# Supplementary material
Source: Research Square preprint supplement (doi:10.21203/rs.3.rs-9858454/v1)
Supplement: Supplementary file 1 [file 0af3807cab9f2fdb7bab2639.xlsx]

## Sheet: Fig.1 & Supp. 1
Raw data_pmol / sample: Total SL_ HeLa- HUVEC_ Fig 1													Raw data_pmol / sample: Individual SL_HeLa-HUVEC_ Supp.Fig 1
cell line	infection	dhSph	Sph	S1P	dhCer total	Cer total	dhSM total	SM total	HexCer total	LacCer total			cell_line	infection	dhSph	Sph	S1P	dhCer 16:0	dhCer 18:0	dhCer 20:0	dhCer 22:0	dhCer 24:0	dhCer 24:1	Cer 16:0	Cer 18:0	Cer 20:0	Cer 22:0	Cer 24:0	Cer 24:1	dhSM 16:0	dhSM 18:0	dhSM 20:0	dhSM 22:0	dhSM 24:0	dhSM 24:1	SM 16:0	SM 18:0	SM 20:0	SM 22:0	SM 24:0	SM 24:1	HexCer 16:0	HexCer 24:1	LacCer 16:0	LacCer 24:1
huvec	uninfected	1.84852	14.9406	20.6228	24.2837	284.762	86.659	1142.11	8.2949	18.7572			huvec	uninfected	1.84852	14.9406	20.6228	12.0861	1.78412	1.50185	3.61896	1.94611	3.34649	75.0083	22.124	4.97473	37.8211	81.4335	63.3999	74.5028	1.49554	0.394365	2.23718	2.28175	5.74736	744.64	17.8811	3.45792	61.6037	96.8503	217.678	4.05646	4.23844	15.9764	2.78077
huvec	uninfected	1.79093	15.488	35.4776	23.999	271.779	109.531	1345.29	8.48765	19.0251			huvec	uninfected	1.79093	15.488	35.4776	13.5541	1.72651	1.19741	2.75613	1.79747	2.96732	80.7412	21.5702	4.03407	30.8248	74.3831	60.2259	94.6708	2.00106	0.467184	2.62876	2.71068	7.05269	825.493	24.1088	4.06131	80.8094	128.149	282.67	4.0284	4.45925	15.9714	3.05371
huvec	uninfected	1.58084	12.2484	14.95	23.131	230.891	99.6408	1056.02	6.59991	14.4866			huvec	uninfected	1.58084	12.2484	14.95	12.6478	1.81561	1.32387	2.67941	1.52506	3.13923	69.6298	21.1114	4.53999	30.5136	54.8289	50.2669	85.7486	1.56266	0.383031	2.37579	2.30004	7.27066	711.907	20.4267	2.97525	52.3376	86.0478	182.328	3.33017	3.26974	12.0144	2.47227
huvec	uninfected	1.88028	15.8605	21.8563	25.1247	334.136	114.559	1456.17	8.40155	16.3313			huvec	uninfected	1.88028	15.8605	21.8563	12.399	2.03944	1.38594	3.49141	2.10601	3.70287	77.8482	22.1	4.65182	42.5067	107.251	79.7778	97.7142	2.02327	0.473646	2.98511	3.2764	8.08603	854.388	28.1116	4.26253	89.1665	168.394	311.846	3.65652	4.74503	13.1265	3.20482
huvec	infected	0.953176	7.98957	10.6916	20.842	227.623	71.6197	678.955	10.0478	12.9028			huvec	infected	0.953176	7.98957	10.6916	10.2648	1.46129	1.14006	2.7549	1.97556	3.24534	64.0077	18.7256	4.07399	28.3155	61.0141	51.4857	59.8745	1.44717	0.395943	2.19276	2.28568	5.42361	477.799	11.2022	2.36518	30.0814	50.9027	106.606	5.09272	4.95507	10.7502	2.15255
huvec	infected	1.04475	8.67825	15.6579	20.3325	230.094	83.6748	829.017	8.95416	13.2588			huvec	infected	1.04475	8.67825	15.6579	10.3789	1.41944	0.99276	2.46625	2.058	3.01721	66.0508	17.1798	3.54195	26.3834	62.2625	54.675	68.358	1.75876	0.468392	2.66283	2.80549	7.62129	552.143	13.3571	2.64696	39.483	68.8999	152.486	4.33373	4.62043	10.9048	2.35396
huvec	infected	0.838693	6.43349	8.26491	18.7735	212.818	85.7139	728.324	7.69561	9.3213			huvec	infected	0.838693	6.43349	8.26491	8.55116	1.4164	1.12043	2.4435	1.94274	3.29928	54.3725	17.0512	3.96529	29.304	54.9055	53.22	70.8532	1.52448	0.39968	2.50727	2.69113	7.73813	496.639	13.572	2.29849	32.7611	59.9	123.153	3.75223	3.94338	7.43497	1.88633
huvec	infected	1.08389	8.88194	11.8646	22.6546	276.625	89.6379	894.97	8.52624	12.1182			huvec	infected	1.08389	8.88194	11.8646	10.4144	1.7958	1.24903	3.00645	2.32589	3.86307	68.1727	19.0911	4.26266	33.9596	83.4769	67.662	73.4042	1.82227	0.469324	2.90418	3.04827	7.98964	571.419	16.1047	2.88389	46.1405	88.5094	169.912	3.86351	4.66273	9.47763	2.6406
hela	uninfected	3.66281	26.2665	7.2611	16.9991	233.428	432.958	3663.41	278.175	200.604			hela	uninfected	3.66281	26.2665	7.2611	5.10614	0.468485	0.236082	1.19332	1.44494	8.55012	58.909	4.56958	0.827158	14.2869	36.8416	117.994	353.142	5.82656	1.49816	10.4467	6.60987	55.4347	1562.56	85.6835	14.1312	261.95	148.672	1590.42	150.442	127.733	168.656	31.9482
hela	uninfected	2.69664	18.2987	12.2474	18.4166	224.729	383.413	3344.43	220.43	128.932			hela	uninfected	2.69664	18.2987	12.2474	5.0968	0.451115	0.236294	1.36105	1.96527	9.3061	47.8287	3.53202	0.709033	13.3263	42.5752	116.758	313.689	4.98397	1.25887	8.9253	6.31857	48.2372	1475.21	64.6698	11.0239	218.317	162.981	1412.23	116.497	103.933	103.807	25.1253
hela	uninfected	1.96571	16.6134	5.3293	10.2008	128.22	311.786	3225.91	147.518	96.6958			hela	uninfected	1.96571	16.6134	5.3293	3.05277	0.278355	0.19837	0.749132	1.19256	4.72961	32.0828	2.54056	0.428946	7.51656	25.0689	60.5819	259.52	4.50733	1.22897	8.17938	6.0769	32.2728	1527.25	59.7655	10.8573	255.05	132.697	1240.29	79.8186	67.6997	80.7559	15.9399
hela	uninfected	3.13922	22.9982	9.30038	16.3175	153.978	371.831	2822.29	231.455	217.416			hela	uninfected	3.13922	22.9982	9.30038	6.2488	0.332322	0.161507	0.926553	1.33176	7.31657	46.5604	3.21978	0.47281	7.89004	24.6054	71.2293	302.35	6.34768	1.49145	8.96165	6.52448	46.1557	1179.09	85.5859	14.228	213.862	136.963	1192.56	119.382	112.073	172.157	45.2586
hela	uninfected	3.29317	26.9131	8.52957	13.5985	190.034	366.489	3410.45	257.415	180.927			hela	uninfected	3.29317	26.9131	8.52957	4.48606	0.391007	0.238586	0.949001	1.21134	6.32252	48.1008	3.80322	0.659688	10.8949	33.4794	93.096	299.846	5.35876	1.31704	8.46505	6.16317	45.339	1429.88	82.0096	13.2482	244.685	158.162	1482.46	134.072	123.342	149.416	31.511
hela	infected	1.89426	10.2026	12.7404	31.6292	154.591	303.573	1868.37	141.552	84.05			hela	infected	1.89426	10.2026	12.7404	5.88274	0.48022	0.293473	1.95104	5.99222	17.0295	39.877	3.35749	0.576318	8.89108	36.5032	65.386	234.74	4.72429	1.38851	10.2043	9.43829	43.0779	1032.21	39.9769	6.88992	117.991	68.3104	602.988	78.637	62.9147	71.3182	12.7318
hela	infected	1.49473	7.96044	14.2417	40.6649	146.172	221.726	1403.85	136.413	71.7794			hela	infected	1.49473	7.96044	14.2417	6.78473	0.485375	0.275087	2.54735	10.0784	20.494	36.1006	2.60486	0.500906	8.51786	42.1488	56.299	169.776	3.70815	1.16012	8.12483	9.16496	29.7914	828.214	30.0174	6.25982	89.457	72.0923	377.807	82.2246	54.1887	59.3688	12.4106
hela	infected	1.50494	8.04	11.2011	19.1087	109.161	292.308	1864.41	119.379	74.7523			hela	infected	1.50494	8.04	11.2011	4.29986	0.426363	0.25203	1.3563	3.78761	8.98656	30.0698	2.44402	0.456533	6.44691	28.6057	41.138	237.425	5.11432	1.56308	9.70746	8.50971	29.9882	1105.51	37.4828	7.84628	134.719	72.7675	506.082	70.2823	49.0964	61.639	13.1133
hela	infected	2.2701	12.855	14.0999	20.2756	142.008	403.473	2407.64	193.035	150.119			hela	infected	2.2701	12.855	14.0999	6.18916	0.439247	0.230009	1.21404	2.74477	9.45834	44.6766	3.25559	0.506122	7.33808	30.0748	56.1566	313.827	7.01385	1.87524	12.9481	11.1164	56.6924	1121.99	58.8355	11.1561	193.495	95.8126	926.343	109.221	83.8139	122.317	27.802
hela	infected	1.9531	11.0305	17.2924	23.888	136.998	312.239	1817.15	170.41	126.245			hela	infected	1.9531	11.0305	17.2924	5.77501	0.443478	0.228338	1.44226	4.56435	11.4346	41.3138	3.1709	0.502999	6.66144	34.1588	51.1901	243.228	5.89652	1.72994	10.8604	10.8955	39.6282	964.871	45.0034	8.94045	136.94	72.899	588.496	97.975	72.4353	103.955	22.2906
Multivariate analysis: Total SL_ HeLa- HUVEC_ Fig1A													Univariate analysis: Individual SL_HeLa-HUVEC_ Supp, Fig 1A
Variance explained:													Variance explained:
PC	Variance	Pct											PC	Var	Pct
PC1	57399479983938	637771999821533											PC1	233130042681704	752032395747432
PC2	157710826274275	175234251415861											PC2	455157894486886	146825127253834
PC3	126004237109999	140004707899999											PC3	16713781677044	539154247646582
PC4	0.293668696092004	326298551213337											PC4	0.673445734159595	217240559406321
PC5	0.072785427074833	0.808726967498145											PC5	0.351729509346638	113461132047303
PC6	0.0385689840699536	0.428544267443929											PC6	0.161270879798089	0.520228644509963
PC7	0.0146254252562455	0.162504725069394											PC7	0.104802810689835	0.338073582870437
PC8	0.00229798610066195	0.0255331788962439											PC8	0.0752008350851037	0.242583338984206
PC9	0.00095484916977112	0.0106094352196791											PC9	0.0484382223935498	0.156252330301774
													PC10	0.019727288250463	0.0636364137111711
Permanova:													PC11	0.0106891772798161	0.034481217031665
													PC12	0.00704156144124863	0.0227147143266085
													PC13	0.00379908534416663	0.0122551140134408
													PC14	0.00333496830658851	0.0107579622793178
													PC15	0.00239383160207379	0.0077220374260445
													PC16	0.0014624694855477	0.00471764350176679
													PC17	0.000702246073639997	0.00226530991496773
													PC18	6.13999e-16	1.98064e-15
													Permanova: (original file is same as Total SL, get again from sudip)
Univariate analysis: Total SL_ HeLa- HUVEC_ Fig. 1B
lipid	cell_line	contrast	estimate	std.error	df	statistic	p.value	p_fdr
sph	hela	infected - uninfected	-0.322656	0.0463123	14	-6.96697	6.58375e-06	0.000118507
sm_total	hela	infected - uninfected	-0.249888	0.0398146	14	-6.27628	2.0348e-05	0.000183132
dh_sph	hela	infected - uninfected	-0.143217	0.0322429	14	-4.4418	0.000558112	0.0020092
sm_total	huvec	infected - uninfected	-0.20201	0.0445141	14	-4.53811	0.000464111	0.0020092
sph	huvec	infected - uninfected	-0.240783	0.0517788	14	-4.65024	0.000374916	0.0020092
dh_cer_total	hela	infected - uninfected	0.233033	0.0562112	14	4.14567	0.00098989	0.00295349					Univariate analysis: Individual SL_ HeLa- HUVEC_Supp, Fig 1B
dh_sph	huvec	infected - uninfected	-0.1467	0.0360486	14	-4.06951	0.00114858	0.00295349					lipid	cell_line	contrast	estimate	std.error	df	statistic	p.value	p_fdr
hex_cer_total	hela	infected - uninfected	-0.169416	0.0489858	14	-3.45848	0.00383936	0.00767871					dh_sm_24_0	hela	infected - uninfected	0.167086	0.0251068	14	6.655	1.08723e-05	0.000337041
s1p	huvec	infected - uninfected	-0.273244	0.07848	14	-3.4817	0.00366618	0.00767871					sph	hela	infected - uninfected	-0.322656	0.0463123	14	-6.96697	6.58375e-06	0.000337041
lac_cer_total	hela	infected - uninfected	-0.210447	0.0731681	14	-2.87621	0.0122022	0.0199673					dh_cer_24_0	hela	infected - uninfected	0.394885	0.0644801	14	6.12414	2.63203e-05	0.000543953
s1p	hela	infected - uninfected	0.203245	0.0701947	14	2.89545	0.0117472	0.0199673					sm_24_1	hela	infected - uninfected	-0.37835	0.0651587	14	-5.80659	4.55057e-05	0.000705338
cer_total	hela	infected - uninfected	-0.121847	0.0482997	14	-2.52273	0.0243715	0.0365573					sm_16_0	hela	infected - uninfected	-0.152573	0.0288688	14	-5.28506	0.000115254	0.00102082
dh_sm_total	hela	infected - uninfected	-0.0905393	0.0407365	14	-2.22256	0.0432305	0.0598576					sm_16_0	huvec	infected - uninfected	-0.174336	0.0322763	14	-5.40137	9.33803e-05	0.00102082
dh_sm_total	huvec	infected - uninfected	-0.0919128	0.0455448	14	-2.01808	0.0631688	0.0812171					sm_24_0	hela	infected - uninfected	-0.28611	0.0532836	14	-5.36958	9.88929e-05	0.00102082
lac_cer_total	huvec	infected - uninfected	-0.149323	0.0818044	14	-1.82537	0.0893497	0.10722					sm_18_0	hela	infected - uninfected	-0.253275	0.0524498	14	-4.8289	0.000267641	0.00207422
cer_total	huvec	infected - uninfected	-0.071477	0.0540007	14	-1.32363	0.206834	0.232688					sph	huvec	infected - uninfected	-0.240783	0.0517788	14	-4.65024	0.000374916	0.00258276
dh_cer_total	huvec	infected - uninfected	-0.0655134	0.0628461	14	-1.04244	0.314874	0.333396					sm_20_0	hela	infected - uninfected	-0.17667	0.0395287	14	-4.46941	0.000529314	0.00288358
hex_cer_total	huvec	infected - uninfected	0.0400226	0.0547678	14	0.73077	0.476973	0.476973					sm_22_0	hela	infected - uninfected	-0.259723	0.0577483	14	-4.4975	0.00050159	0.00288358
													dh_sph	hela	infected - uninfected	-0.143217	0.0322429	14	-4.4418	0.000558112	0.00288358
													sm_22_0	huvec	infected - uninfected	-0.272474	0.0645646	14	-4.22018	0.000856294	0.00408386
													dh_sph	huvec	infected - uninfected	-0.1467	0.0360486	14	-4.06951	0.00114858	0.00445075
													hex_cer_24_1	hela	infected - uninfected	-0.214781	0.052174	14	-4.11663	0.00104757	0.00445075
													sm_24_0	huvec	infected - uninfected	-0.243539	0.0595728	14	-4.08809	0.0011076	0.00445075
													cer_24_1	hela	infected - uninfected	-0.21774	0.0571389	14	-3.81072	0.00190995	0.00696571
													dh_cer_24_1	hela	infected - uninfected	0.233195	0.0619195	14	3.7661	0.00208592	0.00718484
													dh_cer_20_0	huvec	infected - uninfected	-0.0439363	0.0120053	14	-3.65974	0.00257469	0.00840162
													sm_18_0	huvec	infected - uninfected	-0.207683	0.0586407	14	-3.54163	0.0032546	0.0100893
													s1p	huvec	infected - uninfected	-0.273244	0.07848	14	-3.4817	0.00366618	0.010824
													sm_24_1	huvec	infected - uninfected	-0.251636	0.0728496	14	-3.45418	0.00387232	0.0109129
													dh_cer_18_0	huvec	infected - uninfected	-0.0520272	0.0156422	14	-3.32608	0.00499617	0.0134679
													dh_cer_22_0	hela	infected - uninfected	0.118693	0.037577	14	3.15865	0.00697068	0.0180076
													s1p	hela	infected - uninfected	0.203245	0.0701947	14	2.89545	0.0117472	0.0291331
													hex_cer_16_0	hela	infected - uninfected	-0.131355	0.0464397	14	-2.82851	0.0134061	0.029685
													lac_cer_16_0	hela	infected - uninfected	-0.205856	0.0724856	14	-2.83996	0.0131068	0.029685
													lac_cer_24_1	hela	infected - uninfected	-0.219924	0.0770544	14	-2.85414	0.0127455	0.029685
													dh_sm_16_0	hela	infected - uninfected	-0.111021	0.0404733	14	-2.74307	0.0158592	0.0339059
													sm_20_0	huvec	infected - uninfected	-0.119358	0.0441944	14	-2.70076	0.017231	0.0356107
													cer_22_0	hela	infected - uninfected	-0.128769	0.0496517	14	-2.59345	0.0212466	0.0424931
													dh_sm_16_0	huvec	infected - uninfected	-0.109452	0.0452505	14	-2.41881	0.0297758	0.0576906
													cer_18_0	huvec	infected - uninfected	-0.0779245	0.0335503	14	-2.32262	0.0357806	0.0672242
													dh_cer_16_0	huvec	infected - uninfected	-0.0991499	0.0447074	14	-2.21775	0.0436227	0.0795473
													cer_20_0	huvec	infected - uninfected	-0.0485485	0.02216	14	-2.19082	0.0458827	0.0812779
													lac_cer_16_0	huvec	infected - uninfected	-0.157976	0.0810413	14	-1.94932	0.0715803	0.123277
													cer_16_0	hela	infected - uninfected	-0.0789458	0.0411844	14	-1.91689	0.0758915	0.127169
													cer_18_0	hela	infected - uninfected	-0.0551258	0.0300083	14	-1.83702	0.0875254	0.142805
													dh_cer_16_0	hela	infected - uninfected	0.0725423	0.0399875	14	1.81412	0.0911426	0.144893
													dh_sm_22_0	hela	infected - uninfected	0.0530444	0.0302858	14	1.75146	0.101733	0.157687
													cer_16_0	huvec	infected - uninfected	-0.079121	0.0460455	14	-1.71832	0.107763	0.162959
													dh_sm_20_0	hela	infected - uninfected	0.0310384	0.0191519	14	1.62064	0.127392	0.188055
													dh_cer_18_0	hela	infected - uninfected	0.0221553	0.0139908	14	1.58356	0.135615	0.195538
													cer_20_0	hela	infected - uninfected	-0.0291157	0.0198205	14	-1.46897	0.16395	0.231021
													dh_cer_20_0	hela	infected - uninfected	0.014686	0.0107379	14	1.36769	0.192965	0.265863
													cer_22_0	huvec	infected - uninfected	-0.0748088	0.0555123	14	-1.34761	0.19919	0.268473
													dh_cer_22_0	huvec	infected - uninfected	-0.050807	0.0420124	14	-1.20933	0.246561	0.325251
													cer_24_0	huvec	infected - uninfected	-0.0767099	0.0649316	14	-1.1814	0.257126	0.332121
													dh_sm_24_1	hela	infected - uninfected	-0.0623238	0.0544248	14	-1.14514	0.271352	0.343343
													lac_cer_24_1	huvec	infected - uninfected	-0.0760136	0.0861494	14	-0.882347	0.392488	0.486685
													hex_cer_16_0	huvec	infected - uninfected	0.0414617	0.0519212	14	0.79855	0.437889	0.532335
													cer_24_1	huvec	infected - uninfected	-0.0440932	0.0638832	14	-0.690216	0.501341	0.597753
													hex_cer_24_1	huvec	infected - uninfected	0.0314194	0.0583323	14	0.538628	0.598604	0.700254
													cer_24_0	hela	infected - uninfected	0.0279266	0.0580766	14	0.480859	0.638045	0.706407
													dh_cer_24_0	huvec	infected - uninfected	0.0347945	0.072091	14	0.482646	0.636806	0.706407
													dh_sm_18_0	huvec	infected - uninfected	-0.0203637	0.0414343	14	-0.49147	0.630709	0.706407
													dh_sm_18_0	hela	infected - uninfected	-0.0124526	0.03706	14	-0.336011	0.741845	0.803003
													dh_sm_24_0	huvec	infected - uninfected	0.00907704	0.0280703	14	0.323368	0.751196	0.803003
													dh_cer_24_1	huvec	infected - uninfected	0.00655613	0.0692281	14	0.0947032	0.925893	0.956756
													dh_sm_24_1	huvec	infected - uninfected	0.00688069	0.0608488	14	0.113079	0.911574	0.956756
													dh_sm_20_0	huvec	infected - uninfected	0.00119249	0.0214125	14	0.0556913	0.956375	0.966784
													dh_sm_22_0	huvec	infected - uninfected	0.00143544	0.0338605	14	0.0423927	0.966784	0.966784

## Sheet: Fig 2 & Supp. 4
Pre-treatment_(Fig. 2)										Post-treatment_(Supp.Fig. 4)
Desipramin (Fig. 2A)										ARC39 (Supp. Fig. 4A)
Number of families	1										Untreated	2.5 µM
Number of comparisons per family	4									Theoretical mean	100	100
Alpha	0.05									Actual mean	100	69
										Number of values	1	3
Dunnett's multiple comparisons test	Mean diff.	95.00% CI of diff.	Below threshold?	Summary	Adjusted P Value	A-?
- Desipramine vs. 1 µM Desipramine	14	-18.38 to 46.38	No	ns	0.4802	B	1 µM Desipramine			One sample t test	Too few points
- Desipramine vs. 5 µM Desipramine	33.67	1.282 to 66.05	Yes	*	0.0424	C	5 µM Desipramine			t, df		t=6.712, df=2
- Desipramine vs. 15 µM Desipramine	64.67	32.28 to 97.05	Yes	**	0.0012	D	15 µM Desipramine			P value (two tailed)		0.0215
- Desipramine vs. 30 µM Desipramine	91	58.62 to 123.4	Yes	***	0.0001	E	30 µM Desipramine			P value summary		*
										Significant (alpha=0.05)?		Yes
Test details	Mean 1	Mean 2	Mean diff.	SE of diff.	n1	n2	q	DF
- Desipramine vs. 1 µM Desipramine	100	86	14	11.29	1	3	1.24	8		How big is the discrepancy?
- Desipramine vs. 5 µM Desipramine	100	66.33	33.67	11.29	1	3	2.981	8		Discrepancy		-31
- Desipramine vs. 15 µM Desipramine	100	35.33	64.67	11.29	1	3	5.726	8		SD of discrepancy		8
- Desipramine vs. 30 µM Desipramine	100	9	91	11.29	1	3	8.057	8		SEM of discrepancy		4.619
										95% confidence interval		-50.87 to -11.13
ARC39 (Fig. 2B)										R squared (partial eta squared)		0.9575
Number of families	1
Number of comparisons per family	4									Desipramin (Supp: Fig. 4B)
Alpha	0.05										Untreated	15 µM
										Theoretical mean	100	100
Dunnett's multiple comparisons test	Mean Diff.	95.00% CI of diff.	Below threshold?	Summary	Adjusted P Value	A-?				Actual mean	100	49.33
- ARC39 vs. 1 µM ARC39	40.67	19.79 to 61.54	Yes	**	0.0014	B	1 µM ARC39			Number of values	1	3
- ARC39 vs. 5 µM ARC39	49.33	28.46 to 70.21	Yes	***	0.0004	C	5 µM ARC39
- ARC39 vs. 7.5 µM ARC39	76	55.13 to 96.87	Yes	****	<0.0001	D	7.5 µM ARC39			One sample t test	Too few points
- ARC39 vs. 10 µM ARC39	79.67	58.79 to 100.5	Yes	****	<0.0001	E	10 µM ARC39			t, df		t=12.13, df=2
										P value (two tailed)		0.0067
Test details	Mean 1	Mean 2	Mean Diff.	SE of diff.	n1	n2	q	DF		P value summary		**
- ARC39 vs. 1 µM ARC39	100	59.33	40.67	7.28	1	3	5.586	8		Significant (alpha=0.05)?		Yes
- ARC39 vs. 5 µM ARC39	100	50.67	49.33	7.28	1	3	6.776	8
- ARC39 vs. 7.5 µM ARC39	100	24	76	7.28	1	3	10.44	8		How big is the discrepancy?
- ARC39 vs. 10 µM ARC39	100	20.33	79.67	7.28	1	3	10.94	8		Discrepancy		-50.67
										SD of discrepancy		7.234
HPA-12 (Fig. 2C)										SEM of discrepancy		4.177
Number of families	1									95% confidence interval		-68.64 to -32.70
Number of comparisons per family	4									R squared (partial eta squared)		0.9866
Alpha	0.05
										HPA-12 (Supp: Fig. 4C)
Dunnett's multiple comparisons test	Mean diff.	95.00% CI of diff.	Below threshold?	Summary	Adjusted P Value	A-?					Untreated	10 µM
- HPA-12 vs. 1 µM HPA-12	11.33	-19.33 to 41.99	No	ns	0.5877	B	1 µM HPA-12			Theoretical mean	100	100
- HPA-12 vs. 5 µM HPA-12	43.33	12.67 to 73.99	Yes	**	0.0093	C	5 µM HPA-12			Actual mean	100	96
- HPA-12 vs. 10 µM HPA-12	66	35.34 to 96.66	Yes	***	0.0007	D	10 µM HPA-12			Number of values	1	3
- HPA-12 vs. 15 µM HPA-12	80.67	50.01 to 111.3	Yes	***	0.0002	E	15 µM HPA-12
										One sample t test	Too few points
Test details	Mean 1	Mean 2	Mean diff.	SE of diff.	n1	n2	q	DF		t, df		t=1.386, df=2
- HPA-12 vs. 1 µM HPA-12	100	88.67	11.33	10.69	1	3	1.06	8		P value (two tailed)		0.3001
- HPA-12 vs. 5 µM HPA-12	100	56.67	43.33	10.69	1	3	4.053	8		P value summary		ns
- HPA-12 vs. 10 µM HPA-12	100	34	66	10.69	1	3	6.172	8		Significant (alpha=0.05)?		No
- HPA-12 vs. 15 µM HPA-12	100	19.33	80.67	10.69	1	3	7.544	8
										How big is the discrepancy?
Myriocin (Fig. 2D)										Discrepancy		-4
Number of families	1									SD of discrepancy		5
Number of comparisons per family	4									SEM of discrepancy		2.887
Alpha	0.05									95% confidence interval		-16.42 to 8.421
										R squared (partial eta squared)		0.4898
Dunnett's multiple comparisons test	Mean diff.	95.00% CI of diff.	Below threshold?	Summary	Adjusted P Value	A-?
- Myriocin vs. 1 µM Myriocin	0.3333	-41.10 to 41.76	No	ns	>0.9999	B	1 µM Myriocin			Myriocin (Supp: Fig. 4D)
- Myriocin vs. 5 µM Myriocin	7.667	-33.76 to 49.10	No	ns	0.9121	C	5 µM Myriocin				Untreated	25 µM
- Myriocin vs. 15 µM Myriocin	13.33	-28.10 to 54.76	No	ns	0.6759	D	15 µM Myriocin			Theoretical mean	100	100
- Myriocin vs. 25 µM Myriocin	11.33	-30.10 to 52.76	No	ns	0.7662	E	25 µM Myriocin			Actual mean	100	89
										Number of values	1	3
Test details	Mean 1	Mean 2	Mean diff.	SE of diff.	n1	n2	q	DF
- Myriocin vs. 1 µM Myriocin	100	99.67	0.3333	14.45	1	3	0.02307	8		One sample t test	Too few points
- Myriocin vs. 5 µM Myriocin	100	92.33	7.667	14.45	1	3	0.5306	8		t, df		t=1.057, df=2
- Myriocin vs. 15 µM Myriocin	100	86.67	13.33	14.45	1	3	0.9228	8		P value (two tailed)		0.4014
- Myriocin vs. 25 µM Myriocin	100	88.67	11.33	14.45	1	3	0.7844	8		P value summary		ns
										Significant (alpha=0.05)?		No
AKS466 + Fluoxetine (Fig. 2E)
	+ 0.5 µL/mL DMSO	+ 15 µM AKS466	+ 15 µM Fluoxitin							How big is the discrepancy?
Theoretical mean	100	100	100							Discrepancy		-11
Actual mean	100	37.67	31.33							SD of discrepancy		18.03
Number of values	1	3	3							SEM of discrepancy		10.41
										95% confidence interval		-55.78 to 33.78
One sample t test	Too few points									R squared (partial eta squared)		0.3583
t, df		t=7.409, df=2	t=14.71, df=2
P value (two tailed)		0.0177	0.0046							AKS466 + Fluoxetine (Supp. Fig. 4E)
P value summary		*	**								Untreated	+ 15 µM AKS466	+ 15 µM Fluoxitin
Significant (alpha=0.05)?		Yes	Yes							Theoretical mean	100	100	100
										Actual mean	100	59.67	76
How large is the effect?										Number of values	1	3	3
Discrepancy		-62.33	-68.67
SD of discrepancy		14.57	8.083							One sample t test	Too few points
SEM of discrepancy		8.413	4.667							t, df		t=6.073, df=2	t=3.090, df=2
95% confidence interval		-98.53 to -26.14	-88.75 to -48.59							P value (two tailed)		0.0261	0.0907
R squared (partial eta squared)		0.9648	0.9908							P value summary		*	ns
										Significant (alpha=0.05)?		Yes	No
										How large is the effect?
										Discrepancy		-40.33	-24
										SD of discrepancy		11.5	13.45
										SEM of discrepancy		6.642	7.767
										95% confidence interval		-68.91 to -11.76	-57.42 to 9.421
										R squared (partial eta squared)		0.9486	0.8268

## Sheet: Fig. 3 & Supp. 5
Raw data_ pmol / sample: Water-soluble inhibitors															Raw data_ pmol / sample: DMSO-soluble inhibitors
Infection	Inhibitor	dhSph	Sph	S1P	dhCer total	Cer total	dhSM total	SM total	HexCer total	LacCer total					Infection	Inhibitor	dhSph	Sph	S1P	dhCer total	Cer total	dhSM total	SM total	HexCer total	LacCer total
Uninfected	ARC39	4.61181	23.1797	7.18246	21.4474	182.734	414.683	3137.16	500.055	397.904					Uninfected	HPA-12	1.62582	11.188	27.571	6.60726	177.004	54.2563	1297.27	305.773	270.132
Uninfected	ARC39	2.44884	11.4624	5.85276	23.8674	156.481	332.709	3347.42	341.948	195.913					Uninfected	HPA-12	1.54609	10.1134	32.4537	6.1142	194.314	55.8166	1234.49	339.802	188.62
Uninfected	ARC39	3.69389	16.5167	9.55765	22.6159	150.38	460.503	3487.34	584.203	410.716					Uninfected	HPA-12	1.10102	11.4934	10.7201	1.31889	24.3505	23.0671	1223.95	70.4645	33.4057
infected	ARC39	3.33844	7.54685	2.98196	96.4776	134.404	560.933	2206.44	252.556	204.08					infected	HPA-12	1.29909	8.01212	31.363	8.00816	161.258	52.2666	992.733	252.28	215.979
infected	ARC39	2.36589	6.26334	3.49108	66.1266	113.79	382.224	1998.14	242.679	148					infected	HPA-12	1.0562	6.89612	36.115	8.55218	125.831	47.1582	710.527	232.403	216.303
infected	ARC39	3.08292	9.75886	5.73786	49.8761	134.206	500.848	2600.72	493.425	385.77					infected	HPA-12	1.18988	9.7114	22.9687	2.50938	35.3244	26.7709	860.207	64.6758	33.9084
Uninfected	Desipramine	9.38097	52.1111	7.99258	36.8553	418.863	456.707	3197.86	509.915	532.539					Uninfected	Myriocin	2.11604	16.2093	5.65072	8.67468	107.434	242.714	2353.47	147.366	98.0134
Uninfected	Desipramine	8.54976	40.0604	18.0527	51.2923	433.136	469.858	3034.78	426.031	444.656					Uninfected	Myriocin	1.30464	12.813	9.17611	1.55101	31.0075	24.0275	1379.68	75.564	53.0005
Uninfected	Desipramine	2.38919	16.1943	10.1688	14.1304	182.133	322.799	3535.95	193.373	97.4727					Uninfected	Myriocin	0.997964	10.0792	13.5775	2.11176	32.0277	24.0291	857.951	65.183	38.7534
infected	Desipramine	8.16617	23.8571	6.15785	90.7866	358.921	696.24	2787.7	296.531	323.211					infected	Myriocin	1.16641	11.6684	20.2512	2.26212	36.572	25.2686	938.521	57.2061	38.6489
infected	Desipramine	6.11696	18.2267	5.73227	119.273	392.708	721.531	2856.69	271.338	219.712					infected	Myriocin	1.30267	10.4061	14.6443	2.99217	40.2099	26.0622	993.805	67.1087	29.853
infected	Desipramine	1.54253	9.31332	12.8495	26.0681	116.01	262.745	1689.27	152.58	80.358					infected	Myriocin	1.17198	6.50272	13.6523	27.247	98.0522	186.099	1245.35	119.58	63.2537
Uninfected	untreated	3.66281	26.2665	7.2611	16.9991	233.428	432.958	3663.41	278.175	200.604					Uninfected	AKS466	1.48078	5.81962	1.70823	22.2124	44.8591	145.872	609.238	24.1828	15.0343
Uninfected	untreated	2.69664	18.2987	12.2474	18.4166	224.729	383.413	3344.43	220.43	128.932					Uninfected	AKS466	1.0251	5.87574	5.1236	32.4171	73.6043	147.303	580.603	58.6334	27.5346
Uninfected	untreated	1.96571	16.6134	5.3293	10.2008	128.22	311.786	3225.91	147.518	96.6958					infected	AKS466	1.69427	5.57797	1.33689	33.6815	57.6372	174.121	682.607	29.722	16.9929
Uninfected	untreated	3.13922	22.9982	9.30038	16.3175	153.978	371.831	2822.29	231.455	217.416					infected	AKS466	1.41264	5.53811	8.55938	54.9474	70.3855	166.729	556.489	53.8979	33.9598
Uninfected	untreated	3.29317	26.9131	8.52957	13.5985	190.034	366.489	3410.45	257.415	180.927					Uninfected	DMSO	3.27001	24.5818	13.0112	19.1181	283.109	420.194	3974.15	284.792	233.561
infected	untreated	1.89426	10.2026	12.7404	31.6292	154.591	303.573	1868.37	141.552	84.05					Uninfected	DMSO	2.12737	15.1375	12.5748	15.3356	177.743	274.692	2559.65	183.589	137.59
infected	untreated	1.49473	7.96044	14.2417	40.6649	146.172	221.726	1403.85	136.413	71.7794					Uninfected	DMSO	1.29433	9.49792	28.0402	5.00844	151.174	48.2718	1151.95	341.377	188.813
infected	untreated	1.50494	8.04	11.2011	19.1087	109.161	292.308	1864.41	119.379	74.7523					Uninfected	DMSO	1.55043	10.7093	0.661762	5.38327	62.7634	137.894	1607.83	57.7452	20.3877
infected	untreated	2.2701	12.855	14.0999	20.2756	142.008	403.473	2407.64	193.035	150.119					Uninfected	DMSO	2.07228	20.8523	22.7356	9.03113	160.893	215.451	2600.21	163.498	56.9559
infected	untreated	1.9531	11.0305	17.2924	23.888	136.998	312.239	1817.15	170.41	126.245					infected	DMSO	2.22032	14.5958	16.9202	25.9286	171.806	337.76	2022.76	155.806	117.988
															infected	DMSO	1.66433	9.38097	12.9137	33.7128	166.116	240.768	1569.66	141.58	68.1328
Univariate analysis: Water-soluble inhibitors															infected	DMSO	1.25221	7.40563	37.2837	11.1019	133.158	48.0014	800.91	290.217	269.145
Inhibitors (Fig 3)								Inhibitors + Sne Infection (Supp. Fig. 5)							infected	DMSO	2.02247	9.99133	1.43533	12.2672	76.3332	249.559	1495.93	87.9483	34.2254
Variance explained:								Varianace explained:							infected	DMSO	1.19002	8.71438	10.6649	11.4706	88.5215	212.291	1263.29	88.9097	40.9203
PC	Variance	Pct						PC	Variance	Pct
PC1	579098262119415	643442513466017						PC1	512719574612978	569688416236642					Univariate analysis: DMSO-soluble inhibitors
PC2	118832866582762	132036518425291						PC2	180825920815601	200917689795113					Inhibitors (Fig 3)							Inhibitors + Sne Infection (Supp. Fig. 5)
PC3	0.951827676094448	105758630677161						PC3	11353216566454	126146850738378					Variance explained:							Varianace explained:
PC4	0.670326017081554	744806685646171						PC4	0.578471279692111	642745866324567					PC	Variance	Pct					PC	Variance	Pct
PC5	0.314625832081898	349584257868776						PC5	0.207427024097231	230474471219145					PC1	498313733515645	553681926128494					PC1	418701449303744	465223832559715
PC6	0.0684271733232502	0.76030192581389						PC6	0.11896688680022	132185429778022					PC2	237199996563288	263555551736987					PC2	263692039092743	292991154547493
PC7	0.0109035692010484	0.121150768900538						PC7	0.0123716165884997	0.137462406538886					PC3	128577355209922	142863728011024					PC3	167292372472715	185880413858572
PC8	0.00452281757591802	0.0502535286213113						PC8	0.00630596090178222	0.0700662322420246					PC4	0.201588192967837	223986881075375					PC4	0.231825280231859	257583644702065
PC9	5.56276e+09	0.000618084667881447						PC9	0.00568062098896667	0.0631180109885185					PC5	0.0969213673832331	107690408203592					PC5	0.16358789259141	181764325101566
															PC6	0.0394397574051828	0.438219526724253					PC6	0.052452193601122	0.582802151123578
Permanova:								Permanova:							PC7	0.00959016952927367	0.106557439214152					PC7	0.0261198549569045	0.290220610632272
															PC8	0.00676328648263399	0.075147627584822					PC8	0.0157177607868526	0.174641786520584
															PC9	0.00478637334328754	0.0531819260365281					PC9	0.0134384091398347	0.149315657109274
																						Permanova:
															Permanova:
Dispersion test:
								Dispersion test:
															Dispersion test:							Dispersion test:
Univariate analysis: Water-soluble inhibitors_ (Supp. Fig. 5)
lipid	infection	term	contrast	null.value	estimate	std.error	df	statistic	p.value						Univariate analysis:DMSO-soluble inhibitors_ (Supp. Fig. 5)
s1p	infected	inhibitor	ARC39 - untreated	0	-0.476079	0.0728705	12	-6.53322	2.7971e-05						lipid	infection	term	contrast	null.value	estimate	std.error	df	statistic	p.value
dh_cer_total	infected	inhibitor	ARC39 - untreated	0	0.408645	0.0811173	12	5.0377	0.000290415						dh_sm_total	infected	inhibitor	(HPA-12) - DMSO	0	-0.648705	0.218965	12	-2.9626	0.0118632
hex_cer_total	Uninfected	inhibitor	ARC39 - untreated	0	0.319164	0.084357	12	3.78349	0.00260698						dh_sm_total	Uninfected	inhibitor	(HPA-12) - DMSO	0	-0.621016	0.218965	12	-2.83614	0.0150037
hex_cer_total	infected	inhibitor	ARC39 - untreated	0	0.316104	0.084357	12	3.74722	0.00278506						dh_cer_total	infected	inhibitor	(HPA-12) - DMSO	0	-0.427788	0.175658	12	-2.43534	0.0314243
dh_sm_total	infected	inhibitor	ARC39 - untreated	0	0.197593	0.0555001	12	3.56023	0.0039222						sm_total	Uninfected	inhibitor	(HPA-12) - DMSO	0	-0.240466	0.110107	12	-2.18393	0.0495437
lac_cer_total	infected	inhibitor	ARC39 - untreated	0	0.366513	0.11949	12	3.0673	0.00976565						sm_total	infected	inhibitor	(HPA-12) - DMSO	0	-0.208494	0.110107	12	-1.89356	0.0826392
dh_sph	infected	inhibitor	ARC39 - untreated	0	0.143362	0.0528088	12	2.71474	0.0187898						dh_cer_total	Uninfected	inhibitor	(HPA-12) - DMSO	0	-0.32083	0.175658	12	-1.82644	0.0927502
lac_cer_total	Uninfected	inhibitor	ARC39 - untreated	0	0.301793	0.11949	12	2.52567	0.0266306						dh_sph	Uninfected	inhibitor	(HPA-12) - DMSO	0	-0.0935443	0.0563389	12	-1.66038	0.122721
dh_cer_total	Uninfected	inhibitor	ARC39 - untreated	0	0.17424	0.0811173	12	2.148	0.0528313						sph	Uninfected	inhibitor	(HPA-12) - DMSO	0	-0.132827	0.0847686	12	-1.56694	0.143108
sm_total	infected	inhibitor	ARC39 - untreated	0	0.0870314	0.0433253	12	2.00879	0.067604						dh_sph	infected	inhibitor	(HPA-12) - DMSO	0	-0.0830334	0.0563389	12	-1.47382	0.166273
sph	Uninfected	inhibitor	ARC39 - untreated	0	-0.117762	0.0714491	12	-1.6482	0.125227						s1p	infected	inhibitor	(HPA-12) - DMSO	0	0.399766	0.289554	12	1.38063	0.192568
sph	infected	inhibitor	ARC39 - untreated	0	-0.0943714	0.0714491	12	-1.32082	0.211196						s1p	Uninfected	inhibitor	(HPA-12) - DMSO	0	0.282131	0.289554	12	0.974364	0.349109
dh_sph	Uninfected	inhibitor	ARC39 - untreated	0	0.0611136	0.0528088	12	1.15726	0.269682						cer_total	Uninfected	inhibitor	(HPA-12) - DMSO	0	-0.198654	0.21774	12	-0.912346	0.379551
cer_total	Uninfected	inhibitor	ARC39 - untreated	0	-0.0474326	0.0553475	12	-0.856997	0.408236						sph	infected	inhibitor	(HPA-12) - DMSO	0	-0.0717605	0.0847686	12	-0.846546	0.413812
s1p	Uninfected	inhibitor	ARC39 - untreated	0	-0.0423847	0.0728705	12	-0.581645	0.571571						cer_total	infected	inhibitor	(HPA-12) - DMSO	0	-0.12782	0.21774	12	-0.587031	0.568063
cer_total	infected	inhibitor	ARC39 - untreated	0	-0.0319031	0.0553475	12	-0.576415	0.574988						lac_cer_total	infected	inhibitor	(HPA-12) - DMSO	0	0.168925	0.308018	12	0.548425	0.593457
dh_sm_total	Uninfected	inhibitor	ARC39 - untreated	0	0.0312519	0.0555001	12	0.563095	0.583738						lac_cer_total	Uninfected	inhibitor	(HPA-12) - DMSO	0	0.10585	0.308018	12	0.34365	0.737056
sm_total	Uninfected	inhibitor	ARC39 - untreated	0	0.00519053	0.0433253	12	0.119804	0.906621						hex_cer_total	infected	inhibitor	(HPA-12) - DMSO	0	0.0530549	0.214912	12	0.246868	0.809183
															hex_cer_total	Uninfected	inhibitor	(HPA-12) - DMSO	0	0.0427578	0.214912	12	0.198955	0.845629
dh_cer_total	infected	inhibitor	Desipramin - untreated	0	0.393008	0.149252	12	2.63319	0.0218468
dh_sm_total	infected	inhibitor	Desipramin - untreated	0	0.227497	0.090464	12	2.51478	0.0271682						dh_sph	Uninfected	inhibitor	Myriocin - DMSO	0	-0.0904696	0.061318	12	-1.47542	0.165851
s1p	infected	inhibitor	Desipramin - untreated	0	-0.228277	0.0918188	12	-2.48616	0.0286327						dh_sph	infected	inhibitor	Myriocin - DMSO	0	-0.0764387	0.061318	12	-1.24659	0.236331
dh_sph	infected	inhibitor	Desipramin - untreated	0	0.291477	0.125424	12	2.32394	0.0384914						sph	Uninfected	inhibitor	Myriocin - DMSO	0	-0.068793	0.0939712	12	-0.732065	0.478183
cer_total	infected	inhibitor	Desipramin - untreated	0	0.267121	0.120038	12	2.22529	0.0459987						sph	infected	inhibitor	Myriocin - DMSO	0	-0.0207631	0.0939712	12	-0.220952	0.828845
cer_total	Uninfected	inhibitor	Desipramin - untreated	0	0.246572	0.120038	12	2.05411	0.0624171						s1p	Uninfected	inhibitor	Myriocin - DMSO	0	-0.0695911	0.284409	12	-0.244687	0.810833
dh_sph	Uninfected	inhibitor	Desipramin - untreated	0	0.250453	0.125424	12	1.99685	0.0690349						s1p	infected	inhibitor	Myriocin - DMSO	0	0.142567	0.284409	12	0.501275	0.625247
sm_total	infected	inhibitor	Desipramin - untreated	0	0.110158	0.055734	12	1.9765	0.0715405						dh_cer_total	Uninfected	inhibitor	Myriocin - DMSO	0	-0.391923	0.224936	12	-1.74237	0.106987
dh_cer_total	Uninfected	inhibitor	Desipramin - untreated	0	0.293045	0.149252	12	1.96342	0.0731938						dh_cer_total	infected	inhibitor	Myriocin - DMSO	0	-0.399217	0.224936	12	-1.7748	0.101279
hex_cer_total	Uninfected	inhibitor	Desipramin - untreated	0	0.194172	0.0989499	12	1.96233	0.0733342						cer_total	Uninfected	inhibitor	Myriocin - DMSO	0	-0.493939	0.165034	12	-2.99296	0.0112125
hex_cer_total	infected	inhibitor	Desipramin - untreated	0	0.186098	0.0989499	12	1.88073	0.0844911						cer_total	infected	inhibitor	Myriocin - DMSO	0	-0.357121	0.165034	12	-2.16393	0.0513495
sph	infected	inhibitor	Desipramin - untreated	0	0.194977	0.109074	12	1.78756	0.0991081						dh_sm_total	Uninfected	inhibitor	Myriocin - DMSO	0	-0.519195	0.303412	12	-1.71119	0.112747
sph	Uninfected	inhibitor	Desipramin - untreated	0	0.166067	0.109074	12	1.52251	0.153789						dh_sm_total	infected	inhibitor	Myriocin - DMSO	0	-0.55832	0.303412	12	-1.84014	0.0906001
lac_cer_total	infected	inhibitor	Desipramin - untreated	0	0.26401	0.174314	12	1.51457	0.155769						sm_total	Uninfected	inhibitor	Myriocin - DMSO	0	-0.189589	0.127581	12	-1.48602	0.163066
lac_cer_total	Uninfected	inhibitor	Desipramin - untreated	0	0.255039	0.174314	12	1.4631	0.169134						sm_total	infected	inhibitor	Myriocin - DMSO	0	-0.114589	0.127581	12	-0.898166	0.386764
s1p	Uninfected	inhibitor	Desipramin - untreated	0	0.127459	0.0918188	12	1.38816	0.190322						hex_cer_total	Uninfected	inhibitor	Myriocin - DMSO	0	-0.289677	0.171379	12	-1.69027	0.116763
dh_sm_total	Uninfected	inhibitor	Desipramin - untreated	0	0.0437346	0.090464	12	0.483447	0.637479						hex_cer_total	infected	inhibitor	Myriocin - DMSO	0	-0.250167	0.171379	12	-1.45973	0.170042
sm_total	Uninfected	inhibitor	Desipramin - untreated	0	-0.00422287	0.055734	12	-0.0757683	0.940852						lac_cer_total	Uninfected	inhibitor	Myriocin - DMSO	0	-0.200893	0.248487	12	-0.808464	0.434559
															lac_cer_total	infected	inhibitor	Myriocin - DMSO	0	-0.271404	0.248487	12	-1.09222	0.296178
															dh_sph	Uninfected	inhibitor	AKS466 - DMSO	0	-0.125549	0.069881	10	-1.79662	0.102616
															dh_sph	infected	inhibitor	AKS466 - DMSO	0	-0.0149142	0.069881	10	-0.213423	0.835285
															sph	Uninfected	inhibitor	AKS466 - DMSO	0	-0.37344	0.102957	10	-3.62713	0.00463457
															sph	infected	inhibitor	AKS466 - DMSO	0	-0.215684	0.102957	10	-2.09488	0.0626134
															s1p	Uninfected	inhibitor	AKS466 - DMSO	0	-0.457789	0.373869	10	-1.22446	0.248841
															s1p	infected	inhibitor	AKS466 - DMSO	0	-0.412114	0.373869	10	-1.10229	0.296155
															dh_cer_total	Uninfected	inhibitor	AKS466 - DMSO	0	0.42447	0.175738	10	2.41536	0.0363489
															dh_cer_total	infected	inhibitor	AKS466 - DMSO	0	0.389494	0.175738	10	2.21634	0.05101
															cer_total	Uninfected	inhibitor	AKS466 - DMSO	0	-0.413276	0.156146	10	-2.64673	0.0244501
															cer_total	infected	inhibitor	AKS466 - DMSO	0	-0.274806	0.156146	10	-1.75993	0.108916
															dh_sm_total	Uninfected	inhibitor	AKS466 - DMSO	0	-0.078065	0.256887	10	-0.303888	0.767442
															dh_sm_total	infected	inhibitor	AKS466 - DMSO	0	-0.0323034	0.256887	10	-0.12575	0.902422
															sm_total	Uninfected	inhibitor	AKS466 - DMSO	0	-0.563177	0.136443	10	-4.12757	0.00205212
															sm_total	infected	inhibitor	AKS466 - DMSO	0	-0.346162	0.136443	10	-2.53705	0.029512
															hex_cer_total	Uninfected	inhibitor	AKS466 - DMSO	0	-0.660082	0.21124	10	-3.1248	0.0107856
															hex_cer_total	infected	inhibitor	AKS466 - DMSO	0	-0.529814	0.21124	10	-2.50811	0.0310129
															lac_cer_total	Uninfected	inhibitor	AKS466 - DMSO	0	-0.646504	0.304941	10	-2.1201	0.0600139
															lac_cer_total	infected	inhibitor	AKS466 - DMSO	0	-0.503878	0.304941	10	-1.65238	0.129465
															DES activity assay (Fig. 3G)
															FU Berlin sample ID	Würzburg sample ID		Final Conc. nM	Final Conc. nM	Final Conc. nM	conversion rate [%]
															1	1.1	DMSO+ methanol+ HeLa_1	-	-	88.7795	-
															2	1.2	DMSO+ methanol+ HeLa_1	-	-	87.6631	-
															3	1.3	C13-dhCer-d7+ HeLa_1	1.45562	180.36	87.0916	0.800604
															4	1.4	C13-dhCer-d7+ HeLa_1	1.40441	167.809	83.0871	0.829961
															5	1.5	AKS466 + HeLa_1	-	-	73.7445	-
															6	1.6	AKS466 + HeLa_1	-	-	96.3143	-
															7	1.7	AKS466 + C13-dhCer-d7+ HeLa_1	0.98057	250.825	75.2139	0.389415
															8	1.8	AKS466 + C13-dhCer-d7+ HeLa_1	0.928228	293.548	88.1353	0.315213
															9	2.1	DMSO+ methanol+ HeLa_2	-	-	152.711	-
															10	2.2	DMSO+ methanol+ HeLa_2	-	-	130.581	-
															11	2.3	C13-dhCer-d7+ HeLa_2	1.17833	207.295	93.4373	0.565216
															12	2.4	C13-dhCer-d7+ HeLa_2	1.46223	241.773	133.625	0.601158
															13	2.5	AKS466 + HeLa_2	-	-	65.5548	-
															14	2.6	AKS466 + HeLa_2	-	-	101.26	-
															15	2.7	AKS466 + C13-dhCer-d7+ HeLa_2	0.74611	246.67	91.0412	0.30156
															16	2.8	AKS466 + C13-dhCer-d7+ HeLa_2	0.771742	258.82	96.5474	0.29729
															17	3.1	DMSO+ methanol+ HeLa_3	-	-	216.514	-
															18	3.2	DMSO+ methanol+ HeLa_3	-	-	227.167	-
															19	3.3	C13-dhCer-d7+ HeLa_3	2.37838	385.588	239.99	0.613036
															20	3.4	C13-dhCer-d7+ HeLa_3	1.93931	306.887	213.683	0.627962
															21	3.5	AKS466 + HeLa_3	-	-	196.603	-
															22	3.6	AKS466 + HeLa_3	-	-	200.66	-
															23	3.7	AKS466 + C13-dhCer-d7+ HeLa_3	0.79601	247.853	181.224	0.320134
															24	3.8	AKS466 + C13-dhCer-d7+ HeLa_3	1.09485	382.328	207.822	0.285546
															Statistical analysis:
															Table Analyzed
															Group B	+ 15 µM AKS466
															vs.	vs.
															Group A	0
															Unpaired t test with Welch's correction
															P value	0.0003
															P value summary	***
															Significantly different (P < 0.05)?	Yes
															One- or two-tailed P value?	Two-tailed
															Welch-corrected t, df	t=7.331, df=6.055
															How large is the effect?
															Mean of group A	0.673
															Mean of group B	0.3182
															Difference between means (B - A) ± SEM	-0.3548 ± 0.04840
															95% confidence interval	-0.4730 to -0.2367
															R squared (eta squared)	0.8987
															F test to compare variances
															F, DFn, Dfd	9.374, 5, 5
															P value	0.0282
															P value summary	*
															Significantly different (P < 0.05)?	Yes
															Data analyzed
															Sample size, group A	6
															Sample size, group B	6

## Sheet: Fig. 4
ASM kd_ infection assay_ Fig. 4A
Number of families	1
Number of comparisons per family	6
Alpha	0.05
Šídák's multiple comparisons test	Mean diff.	95.00% CI of diff.	Below threshold?	Summary	Adjusted P Value
WT vs. ASM kd2	4.26	-7.894 to 16.41	No	ns	0.8961	A-B
WT vs. ASM kd6	1.025	-11.13 to 13.18	No	ns	>0.9999	A-C
WT vs. ASM kd2	6.878	-5.276 to 19.03	No	ns	0.5097	D-E
WT vs. ASM kd6	19.91	7.755 to 32.06	Yes	***	0.0008	D-F
WT vs. ASM kd2	34.52	22.36 to 46.67	Yes	****	<0.0001	G-H
WT vs. ASM kd6	27.12	14.96 to 39.27	Yes	****	<0.0001	G-I
Test details	Mean 1	Mean 2	Mean diff.	SE of diff.	n1	n2	t	DF
WT vs. ASM kd2	100	95.74	4.26	4.116	3	3	1.035	18
WT vs. ASM kd6	100	98.97	1.025	4.116	3	3	0.2491	18
WT vs. ASM kd2	89.6	82.73	6.878	4.116	3	3	1.671	18
WT vs. ASM kd6	89.6	69.69	19.91	4.116	3	3	4.837	18
WT vs. ASM kd2	84.96	50.44	34.52	4.116	3	3	8.386	18
WT vs. ASM kd6	84.96	57.84	27.12	4.116	3	3	6.588	18
CERT ko_ infection assay_ Fig. 4B
Compare cell means with others in its row and its column
Number of families	5
Number of comparisons per row family	3
Number of comparisons per column family	1
Alpha	0.05
Šídák's multiple comparisons test	Mean diff.	95.00% CI of diff.	Below threshold?	Summary	Adjusted P Value
HeLa Wt
10% fcs inact. vs. 5% fcs inact.	10.46	2.859 to 18.07	Yes	**	0.0074
10% fcs inact. vs. 2.5% fcs inact	11.64	4.032 to 19.24	Yes	**	0.0034
5% fcs inact. vs. 2.5% fcs inact	1.173	-6.430 to 8.776	No	ns	0.9662
CERT_KO
10% fcs inact. vs. 5% fcs inact.	7.19	-0.4127 to 14.79	No	ns	0.0657
10% fcs inact. vs. 2.5% fcs inact	8.902	1.299 to 16.50	Yes	*	0.021
5% fcs inact. vs. 2.5% fcs inact	1.711	-5.892 to 9.314	No	ns	0.9055
10% fcs inact.
HeLa Wt vs. CERT_KO	5.786	-0.1942 to 11.77	No	ns	0.0567
5% fcs inact.
HeLa Wt vs. CERT_KO	2.514	-3.466 to 8.493	No	ns	0.3778
2.5% fcs inact
HeLa Wt vs. CERT_KO	3.052	-2.927 to 9.032	No	ns	0.2879
Test details	Mean 1	Mean 2	Mean diff.	SE of diff.	N1	N2	t	DF
HeLa Wt
10% fcs inact. vs. 5% fcs inact.	100	89.54	10.46	2.745	3	3	3.812	12
10% fcs inact. vs. 2.5% fcs inact	100	88.36	11.64	2.745	3	3	4.239	12
5% fcs inact. vs. 2.5% fcs inact	89.54	88.36	1.173	2.745	3	3	0.4273	12
CERT_KO
10% fcs inact. vs. 5% fcs inact.	94.21	87.02	7.19	2.745	3	3	2.62	12
10% fcs inact. vs. 2.5% fcs inact	94.21	85.31	8.902	2.745	3	3	3.244	12
5% fcs inact. vs. 2.5% fcs inact	87.02	85.31	1.711	2.745	3	3	0.6236	12
10% fcs inact.
HeLa Wt vs. CERT_KO	100	94.21	5.786	2.745	3	3	2.108	12
5% fcs inact.
HeLa Wt vs. CERT_KO	89.54	87.02	2.514	2.745	3	3	0.9159	12
2.5% fcs inact
HeLa Wt vs. CERT_KO	88.36	85.31	3.052	2.745	3	3	1.112	12
AC ko_Infection assay_ Fig. 4C
Number of families	1
Number of comparisons per family	3
Alpha	0.05
Šídák's multiple comparisons test	Mean diff.	95.00% CI of diff.	Below threshold?	Summary	Adjusted P Value
WT vs. AC ko 5	-0.3079	-9.155 to 8.539	No	ns	0.9996	A-B
WT vs. AC ko 5	56.95	48.10 to 65.80	Yes	****	<0.0001	C-D
WT vs. AC ko 5	53.67	44.83 to 62.52	Yes	****	<0.0001	E-F
Test details	Mean 1	Mean 2	Mean diff.	SE of diff.	n1	n2	t	DF
WT vs. AC ko 5	100	100.3	-0.3079	3.193	3	3	0.09642	12
WT vs. AC ko 5	101.9	44.99	56.95	3.193	3	3	17.83	12
WT vs. AC ko 5	98.96	45.28	53.67	3.193	3	3	16.81	12

## Sheet: Fig. 5
SMS2 , SMS2-M64A & SMS2-M64R_ Infection assay_ Fig. 5A
Number of families	1
Number of comparisons per family	9
Alpha	0.05
Šídák's multiple comparisons test	Mean diff.	95.00% CI of diff.	Below threshold?	Summary	Adjusted P Value
Wildtype vs. SMS 1/2 DKO	62.49	47.89 to 77.08	Yes	****	<0.0001	A-B
Wildtype vs. SMS2-M64A	60.56	45.97 to 75.16	Yes	****	<0.0001	A-C
Wildtype vs. SMS2-M64R	49.7	35.10 to 64.30	Yes	****	<0.0001	A-D
Wildtype vs. SMS2	28.74	14.14 to 43.34	Yes	***	0.0004	A-E
SMS 1/2 DKO vs. SMS2-M64R	-12.79	-27.38 to 1.809	No	ns	0.1016	B-D
SMS 1/2 DKO vs. SMS2-M64A	-1.924	-16.52 to 12.67	No	ns	>0.9999	B-C
SMS2-M64R vs. SMS2	-20.96	-35.55 to -6.360	Yes	**	0.0046	D-E
SMS 1/2 DKO vs. SMS2	-33.75	-48.34 to -19.15	Yes	****	<0.0001	B-E
SMS2-M64A vs. SMS2	-31.82	-46.42 to -17.22	Yes	***	0.0002	C-E
Test details	Mean 1	Mean 2	Mean diff.	SE of diff.	n1	n2	t	DF
Wildtype vs. SMS 1/2 DKO	100	37.51	62.49	4.165	3	3	15	10
Wildtype vs. SMS2-M64A	100	39.44	60.56	4.165	3	3	14.54	10
Wildtype vs. SMS2-M64R	100	50.3	49.7	4.165	3	3	11.93	10
Wildtype vs. SMS2	100	71.26	28.74	4.165	3	3	6.901	10
SMS 1/2 DKO vs. SMS2-M64R	37.51	50.3	-12.79	4.165	3	3	3.07	10
SMS 1/2 DKO vs. SMS2-M64A	37.51	39.44	-1.924	4.165	3	3	0.4619	10
SMS2-M64R vs. SMS2	50.3	71.26	-20.96	4.165	3	3	5.032	10
SMS 1/2 DKO vs. SMS2	37.51	71.26	-33.75	4.165	3	3	8.102	10
SMS2-M64A vs. SMS2	39.44	71.26	-31.82	4.165	3	3	7.64	10
SMS1_Infection assay_ Fig. 5B
Number of families	1
Number of comparisons per family	5
Alpha	0.05
Šídák's multiple comparisons test	Mean diff.	95.00% CI of diff.	Below threshold?	Summary	Adjusted P Value
Wildtype (-AHT) vs. Wildtype (+AHT)	4.666	-4.147 to 13.48	No	ns	0.4566	A-B
Wildtype (-AHT) vs. SMS1(-AHT)	48.99	40.17 to 57.80	Yes	****	<0.0001	A-C
Wildtype (-AHT) vs. SMS1(+AHT)	21.98	13.17 to 30.80	Yes	***	0.0002	A-D
SMS1(-AHT) vs. SMS1(+AHT)	-27.01	-35.82 to -18.19	Yes	****	<0.0001	C-D
Wildtype (+AHT) vs. SMS1(+AHT)	17.32	8.503 to 26.13	Yes	***	0.0009	B-D
Test details	Mean 1	Mean 2	Mean diff.	SE of diff.	n1	n2	t	DF
Wildtype (-AHT) vs. Wildtype (+AHT)	100	95.33	4.666	2.637	3	3	1.769	8
Wildtype (-AHT) vs. SMS1(-AHT)	100	51.01	48.99	2.637	3	3	18.57	8
Wildtype (-AHT) vs. SMS1(+AHT)	100	78.02	21.98	2.637	3	3	8.335	8
SMS1(-AHT) vs. SMS1(+AHT)	51.01	78.02	-27.01	2.637	3	3	10.24	8
Wildtype (+AHT) vs. SMS1(+AHT)	95.33	78.02	17.32	2.637	3	3	6.566	8

## Sheet: Fig. 6 & Supp. 13
Raw data_ pmol / sample: SMS1 & SMS2_ Total SL_ Fig 6 & 13
condition	infection	dhSph	Sph	S1P	dhCer total	Cer total	dhSM total	SM total	HexCer total	LacCer total
h_sms12_WT	no	0.536463	2.66768	0.549011	38.2901	124.656	509.284	2842.94	131.146	89.5162
h_sms12_WT	no	0.859116	4.37771	0.985685	45.6942	122.929	494.616	3456.21	130.858	93.4811
h_sms12_WT	no	0.849095	4.28008	0.997099	45.5012	128.481	638.766	3945.08	152.822	101.158
d_sms12_DKO	no	0.385365	4.53352	1.26473	6.29789	100.949	4.56123	145.858	984.469	1565.58
d_sms12_DKO	no	0.464709	4.96951	1.304	7.0287	114.539	4.55486	144.848	1210.12	2039.65
d_sms12_DKO	no	0.511613	5.48571	1.46557	8.32579	110.696	9.0969	185.969	1210.61	2419.41
e_sms1_no_AHT	no	0.55446	6.19379	3.11051	4.43933	122.842	3.83226	128.734	4620.6	720.327
e_sms1_no_AHT	no	0.655504	7.44129	4.3919	6.12389	174.849	3.58523	123.683	4116.22	732.544
e_sms1_no_AHT	no	0.61198	7.24142	3.59798	7.25542	199.35	5.03859	152.729	4224.15	947.867
a_sms1_AHT	no	1.72369	10.0881	3.79941	19.1344	98.2099	699.344	3838.89	208.62	245.447
a_sms1_AHT	no	1.86813	9.84313	4.18071	40.4772	160.048	939.1	4432.33	263.991	281.068
a_sms1_AHT	no	1.60007	10.0818	3.66887	30.1896	109.271	949.696	4298.69	258.521	221.71
f_sms2_no_AHT	no	0.574772	6.54544	3.31564	4.61469	132.411	3.78828	118.682	3874.8	743.118
f_sms2_no_AHT	no	0.520424	8.36936	4.11909	6.06186	162.971	4.38627	152.225	5927.37	1068.76
f_sms2_no_AHT	no	0.686978	8.17852	3.40762	7.32612	205.811	4.78135	149.739	4084.52	925.442
g_sms2-M64R_no_AHT	no	0.509692	7.74598	3.28784	5.47258	169.411	3.59573	129.992	4087.79	769.028
g_sms2-M64R_no_AHT	no	0.813199	8.96114	4.42233	6.40256	163.627	4.75371	175.348	5774.07	1121.88
g_sms2-M64R_no_AHT	no	0.524298	8.24255	3.52993	6.20741	172.143	4.05334	138.201	4199.51	849.752
b_sms2_AHT	no	0.882273	7.39724	1.03871	30.7157	179.082	284.665	2486.58	826.5	1208.38
b_sms2_AHT	no	0.938871	7.1427	1.43404	28.6896	158.749	264.969	2609.81	1008.99	1010.61
b_sms2_AHT	no	0.893566	7.48087	1.07697	31.8447	196.885	245.6	2391.2	669.779	1319.87
c_sms2-M64R_AHT	no	2.02082	14.1557	1.9095	54.4153	254.316	836.262	3141.65	671.349	1820.03
c_sms2-M64R_AHT	no	2.07985	12.3856	2.17697	50.4573	192.402	820.103	3318.22	751.215	1372.28
c_sms2-M64R_AHT	no	3.40063	17.6549	2.67766	63.2047	272.192	955.766	3589.29	1032.73	2708.53
h_sms12_WT	yes	0.50989	3.70842	2.94255	9.78308	63.0245	342.534	2765.75	100.211	98.1756
h_sms12_WT	yes	0.648463	4.84386	3.28477	20.326	77.3632	407.535	3394.14	107.129	93.3177
h_sms12_WT	yes	0.806174	5.52034	2.68573	45.7435	98.1334	596.996	3661.15	135.796	149.366
d_sms12_DKO	yes	0.26495	2.45202	2.12867	6.53012	58.8517	2.57221	62.1257	390.177	741.472
d_sms12_DKO	yes	0.250848	2.60044	2.19789	5.91892	41.8127	2.44898	54.2977	318.87	747.076
d_sms12_DKO	yes	0.281984	2.52764	2.22806	7.67597	53.4081	2.9053	64.7589	412.756	876.839
e_sms1_no_AHT	yes	0.352667	4.38486	4.20304	6.79387	134.614	3.44331	105.092	2800.77	602.668
e_sms1_no_AHT	yes	0.436449	6.53801	6.31105	8.39153	160.875	4.35539	150.763	4025.45	804.511
e_sms1_no_AHT	yes	0.33381	4.76999	4.4135	7.50835	143.634	4.37832	139.107	3134.56	772.858
a_sms1_AHT	yes	0.34757	4.07511	1.75735	6.04913	97.6782	2.69565	78.533	1229.69	696.089
a_sms1_AHT	yes	2.27862	12.406	4.2272	16.819	225.746	6.62349	203.429	1574.96	1617.4
a_sms1_AHT	yes	0.495616	5.33416	2.10727	8.687	130.166	3.36998	113.154	1211.35	1080.67
f_sms2_no_AHT	yes	0.738571	6.16231	6.11258	27.6537	204.427	7.34524	157.323	2395	1520.82
f_sms2_no_AHT	yes	0.803956	6.7639	7.50987	24.4605	218.318	6.23641	163.734	2012.94	1299.52
f_sms2_no_AHT	yes	1.15121	11.0695	6.26919	23.8903	208.81	6.70519	159.458	2361.61	1230.15
g_sms2-M64R_no_AHT	yes	0.741097	9.62041	6.00336	18.1907	185.625	5.60658	173.388	2199.61	1346.81
g_sms2-M64R_no_AHT	yes	0.740513	7.53639	6.37173	24.3273	210.346	4.93597	141.136	1737.35	1127.3
g_sms2-M64R_no_AHT	yes	0.73538	9.09703	5.96115	28.8859	249.928	5.56533	177.659	1900.09	1200.06
b_sms2_AHT	yes	1.02999	5.25754	1.07161	23.5883	117.394	397.609	2099.59	661.723	882.458
b_sms2_AHT	yes	0.961667	6.42661	1.31747	17.3725	129.859	368.354	2263.23	646.22	1272.77
b_sms2_AHT	yes	0.927085	6.18112	1.00404	18.7808	136.858	371.046	2164.84	541.626	1161.55
c_sms2-M64R_AHT	yes	2.06457	10.9158	1.90366	72.0161	225.256	865.068	3092.83	724.662	1397.8
c_sms2-M64R_AHT	yes	1.98088	10.0832	2.52716	61.4693	196.138	905.248	3475.46	887.897	1394.61
c_sms2-M64R_AHT	yes	1.88041	10.8942	1.78239	47.9721	190.729	689.836	2775.72	537.608	1358.95
Univariate analysi: SMS1&2_ Total SL_ Fig 6A
Variance explained:
PC	Var	Pct
PC1	420493627538524	467215141709471
PC2	309612230559637	344013589510708
PC3	0.867295672130579	963661857922865
PC4	0.362993623832881	403326248703201
PC5	0.29038714382207	322652382024522
PC6	0.104994222651365	116660247390406
PC7	0.0457134881799518	0.507927646443909
PC8	0.0244413372002409	0.27157041333601
PC9	0.00311593120129913	0.0346214577922126
MANOVA & Per lipid univariate two-way ANOVAs						Dispersion test:

## Sheet: Supp. 6
Raw data_ pmol / sample: Water-soluble inhibitors_ Individual SL species_(Supp. Fig. 6A)																																		Raw data_ pmol / sample: DMSO-soluble inhibitors_ Individual SL species_(Supp. Fig. 6A)
Infection	Inhibitor	dhSph	Sph	S1P	dhCer 16:0	dhCer 18:0	dhCer 20:0	dhCer 22:0	dhCer 24:0	dhCer 24:1	Cer 16:0	Cer 18:0	Cer 20:0	Cer 22:0	Cer 24:0	Cer 24:1	dhSM 16:0	dhSM 18:0	dhSM 20:0	dhSM 22:0	dhSM 24:0	dhSM 24:1	SM 16:0	SM 18:0	SM 20:0	SM 22:0	SM 24:0	SM 24:1	HexCer 16:0	HexCer 24:1	LacCer 16:0	LacCer 24:1		Infection	Inhibitor	dhSph	Sph	S1P	dhCer 16:0	dhCer 18:0	dhCer 20:0	dhCer 22:0	dhCer 24:0	dhCer 24:1	Cer 16:0	Cer 18:0	Cer 20:0	Cer 22:0	Cer 24:0
Uninfected	ARC39	4.61181	23.1797	7.18246	8.19742	0.60536	0.284452	1.46707	1.67877	9.21436	53.9058	3.68898	0.809062	10.9993	27.7681	85.5629	332.708	7.67148	3.59874	11.8485	6.05038	52.8059	1228.64	106.654	25.7816	267.591	154.017	1354.48	247.056	252.999	292.912	104.992		Uninfected	HPA-12	1.62582	11.188	27.571	1.98169	0.254223	0.298289	0.591724	0.757714	2.72363	52.7766	4.46768	0.743567	7.98869	26.3651
Uninfected	ARC39	2.44884	11.4624	5.85276	6.50982	0.626551	0.346317	1.84654	2.12513	12.413	30.9112	2.77969	0.65464	10.0439	33.2802	78.8116	263.878	6.3253	2.74861	10.8387	5.72701	43.1907	1406.23	75.4458	17.9241	279.034	172.678	1396.1	180.712	161.236	146.377	49.5366		Uninfected	HPA-12	1.54609	10.1134	32.4537	1.40848	0.178599	0.179144	0.526978	0.796961	3.02404	42.1173	3.98231	0.524208	10.3337	37.3826
Uninfected	ARC39	3.69389	16.5167	9.55765	8.94647	0.61634	0.218365	1.10242	1.09883	10.6335	47.9689	3.37739	0.690546	7.86809	18.4905	71.9843	372.329	8.53181	3.46993	12.5255	6.4111	57.2357	1408.28	113.029	24.381	300.296	164.902	1476.45	298.122	286.081	304.267	106.448		Uninfected	HPA-12	1.10102	11.4934	10.7201	0.402278	0.13605	0.137322	0.203675	0.135143	0.304419	10.7598	1.04197	0.180539	1.40228	2.9748
infected	ARC39	3.33844	7.54685	2.98196	21.4115	2.09213	1.01973	6.56136	15.9832	49.4097	37.8882	4.31203	1.06644	10.3147	25.6353	55.1877	402.035	12.2955	5.44418	28.1735	17.4272	95.5578	990.236	70.2549	20.3367	249.849	91.1014	784.663	136.624	115.932	146.024	58.0553		infected	HPA-12	1.29909	8.01212	31.363	1.69576	0.302603	0.254025	0.648141	1.23229	3.87534	39.4573	3.5441	0.633605	7.93624	30.5378
infected	ARC39	2.36589	6.26334	3.49108	12.2225	1.36393	0.721164	4.85201	12.6867	34.2804	25.0902	2.75243	0.766256	8.68156	27.4653	49.034	286.608	8.5527	4.0276	17.2579	11.7753	54.0025	999.858	55.7456	16.88	199.054	102.355	624.245	135.498	107.181	105.927	42.0732		infected	HPA-12	1.0562	6.89612	36.115	1.55565	0.229068	0.163322	0.662945	1.87036	4.07083	27.9877	2.52624	0.405761	6.38925	34.345
infected	ARC39	3.08292	9.75886	5.73786	14.3826	1.12986	0.528937	2.87805	5.95169	25.005	44.2237	3.5345	0.810643	8.16141	20.8341	56.642	368.747	10.5649	4.92086	21.4053	12.8845	82.3261	1081.08	86.6688	23.3037	274.692	121.225	1013.75	249.058	244.367	260.47	125.3		infected	HPA-12	1.18988	9.7114	22.9687	0.697497	0.116744	0.136144	0.26411	0.430476	0.864404	13.9938	1.25063	0.248693	1.97303	6.7558
Uninfected	Desipramine	9.38097	52.1111	7.99258	18.5536	1.6243	0.880532	2.62879	1.65548	11.5125	159.093	22.1166	3.73779	34.0419	47.7607	152.112	356.279	8.01884	6.78014	18.3741	6.40169	60.8534	1263.62	146.403	46.1206	365.052	132.872	1243.79	285.534	224.381	405.448	127.091		Uninfected	Myriocin	2.11604	16.2093	5.65072	3.27071	0.24759	0.139282	0.57583	0.860764	3.58051	30.456	2.09487	0.349441	5.49124	18.4358
Uninfected	Desipramine	8.54976	40.0604	18.0527	24.3946	1.90169	0.990833	4.1477	2.82001	17.0375	148.062	22.1007	4.21001	40.7434	61.3242	156.695	367.161	7.94631	6.98473	18.7244	7.56217	61.4785	1219.81	128.21	42.2264	339.624	161.674	1143.24	231.939	194.093	318.371	126.285		Uninfected	Myriocin	1.30464	12.813	9.17611	0.415419	0.140459	0.163651	0.282253	0.196735	0.352494	13.2323	1.18324	0.236758	1.76767	3.61115
Uninfected	Desipramine	2.38919	16.1943	10.1688	4.21004	0.464533	0.231044	0.997927	1.31253	6.9143	42.7741	3.61867	0.684153	11.386	33.0964	90.5738	259.479	4.33463	1.20793	8.94197	7.35418	41.4811	1538.22	62.171	10.8683	257.961	148.864	1517.87	90.512	102.861	79.7192	17.7535		Uninfected	Myriocin	0.997964	10.0792	13.5775	0.533188	0.130357	0.135527	0.267715	0.355152	0.68982	12.0797	1.10987	0.222005	1.89127	5.7704
infected	Desipramine	8.16617	23.8571	6.15785	35.468	3.37655	1.71691	7.01593	4.96697	38.2422	127.527	24.8711	5.24867	34.7961	41.1038	125.375	492.277	12.7586	8.28078	34.5735	11.782	136.569	1204.47	121.813	37.1896	353.345	106.869	964.011	170.866	125.665	257.486	65.7254		infected	Myriocin	1.16641	11.6684	20.2512	0.636847	0.164408	0.125894	0.26715	0.375799	0.692022	14.5907	1.25472	0.239781	2.064	6.27226
infected	Desipramine	6.11696	18.2267	5.73227	35.7959	3.24713	1.98349	9.93874	9.6089	58.6984	119.029	24.366	5.37817	41.9641	59.4839	142.487	492.904	11.7339	8.43966	36.0623	17.2487	155.142	1248.37	110.311	35.3781	347.774	141.621	973.238	142.023	129.315	170.98	48.7317		infected	Myriocin	1.30267	10.4061	14.6443	0.622847	0.18157	0.197804	0.405582	0.532682	1.05169	12.4814	1.26891	0.267903	2.58668	8.71355
infected	Desipramine	1.54253	9.31332	12.8495	6.10125	0.447537	0.230682	1.45055	4.97072	12.8674	35.2502	2.70912	0.447918	5.89907	27.457	44.2464	200.701	4.27024	1.29362	9.72747	12.3084	34.4445	967.58	32.9879	6.6232	116.461	79.0218	486.598	86.7321	65.8479	67.5275	12.8305		infected	Myriocin	1.17198	6.50272	13.6523	5.88709	0.404441	0.204587	1.59565	5.80343	13.3518	28.8877	2.13286	0.383848	5.18347	24.3314
Uninfected	Untreated	3.66281	26.2665	7.2611	5.10614	0.468485	0.236082	1.19332	1.44494	8.55012	58.909	4.56958	0.827158	14.2869	36.8416	117.994	353.142	5.82656	1.49816	10.4467	6.60987	55.4347	1562.56	85.6835	14.1312	261.95	148.672	1590.42	150.442	127.733	168.656	31.9482		Uninfected	AKS466	1.48078	5.81962	1.70823	4.05482	0.671602	0.299967	3.61248	4.76019	8.81334	11.6395	1.74671	0.398488	4.13556	13.7279
Uninfected	Untreated	2.69664	18.2987	12.2474	5.0968	0.451115	0.236294	1.36105	1.96527	9.3061	47.8287	3.53202	0.709033	13.3263	42.5752	116.758	313.689	4.98397	1.25887	8.9253	6.31857	48.2372	1475.21	64.6698	11.0239	218.317	162.981	1412.23	116.497	103.933	103.807	25.1253		Uninfected	AKS466	1.0251	5.87574	5.1236	6.08689	1.43925	0.99573	4.13838	4.48025	15.2766	21.4095	3.36012	0.934741	9.58944	12.4238
Uninfected	Untreated	1.96571	16.6134	5.3293	3.05277	0.278355	0.19837	0.749132	1.19256	4.72961	32.0828	2.54056	0.428946	7.51656	25.0689	60.5819	259.52	4.50733	1.22897	8.17938	6.0769	32.2728	1527.25	59.7655	10.8573	255.05	132.697	1240.29	79.8186	67.6997	80.7559	15.9399		infected	AKS466	1.69427	5.57797	1.33689	3.84412	0.747409	0.409515	5.01967	8.2941	15.3667	12.5023	1.93043	0.482728	5.1941	18.4202
Uninfected	Untreated	3.13922	22.9982	9.30038	6.2488	0.332322	0.161507	0.926553	1.33176	7.31657	46.5604	3.21978	0.47281	7.89004	24.6054	71.2293	302.35	6.34768	1.49145	8.96165	6.52448	46.1557	1179.09	85.5859	14.228	213.862	136.963	1192.56	119.382	112.073	172.157	45.2586		infected	AKS466	1.41264	5.53811	8.55938	15.7147	2.8928	2.02247	6.48172	6.14449	21.6912	25.9595	3.7326	1.08875	8.28805	9.67374
Uninfected	Untreated	3.29317	26.9131	8.52957	4.48606	0.391007	0.238586	0.949001	1.21134	6.32252	48.1008	3.80322	0.659688	10.8949	33.4794	93.096	299.846	5.35876	1.31704	8.46505	6.16317	45.339	1429.88	82.0096	13.2482	244.685	158.162	1482.46	134.072	123.342	149.416	31.511		Uninfected	DMSO	3.27001	24.5818	13.0112	5.96323	0.545422	0.284639	1.37451	1.46908	9.48121	73.8648	5.79218	1.04095	16.349	45.8352
infected	Untreated	1.89426	10.2026	12.7404	5.88274	0.48022	0.293473	1.95104	5.99222	17.0295	39.877	3.35749	0.576318	8.89108	36.5032	65.386	234.74	4.72429	1.38851	10.2043	9.43829	43.0779	1032.21	39.9769	6.88992	117.991	68.3104	602.988	78.637	62.9147	71.3182	12.7318		Uninfected	DMSO	2.12737	15.1375	12.5748	4.7263	0.387283	0.221634	1.21008	1.46495	7.32533	43.3069	3.29758	0.612054	11.3351	34.0001
infected	Untreated	1.49473	7.96044	14.2417	6.78473	0.485375	0.275087	2.54735	10.0784	20.494	36.1006	2.60486	0.500906	8.51786	42.1488	56.299	169.776	3.70815	1.16012	8.12483	9.16496	29.7914	828.214	30.0174	6.25982	89.457	72.0923	377.807	82.2246	54.1887	59.3688	12.4106		Uninfected	DMSO	1.29433	9.49792	28.0402	1.52389	0.160105	0.1255	0.350152	0.541515	2.30727	44.2384	3.78389	0.439365	6.58745	24.0808
infected	Untreated	1.50494	8.04	11.2011	4.29986	0.426363	0.25203	1.3563	3.78761	8.98656	30.0698	2.44402	0.456533	6.44691	28.6057	41.138	237.425	5.11432	1.56308	9.70746	8.50971	29.9882	1105.51	37.4828	7.84628	134.719	72.7675	506.082	70.2823	49.0964	61.639	13.1133		Uninfected	DMSO	1.55043	10.7093	0.661762	1.76538	0.165378	0.0854117	0.566381	0.890529	1.91018	20.9457	1.39542	0.190233	2.68057	13.6966
infected	Untreated	2.2701	12.855	14.0999	6.18916	0.439247	0.230009	1.21404	2.74477	9.45834	44.6766	3.25559	0.506122	7.33808	30.0748	56.1566	313.827	7.01385	1.87524	12.9481	11.1164	56.6924	1121.99	58.8355	11.1561	193.495	95.8126	926.343	109.221	83.8139	122.317	27.802		Uninfected	DMSO	2.07228	20.8523	22.7356	3.77846	0.298307	0.14735	0.447468	0.732126	3.62742	56.6755	4.69826	0.593083	8.61254	22.5586
infected	Untreated	1.9531	11.0305	17.2924	5.77501	0.443478	0.228338	1.44226	4.56435	11.4346	41.3138	3.1709	0.502999	6.66144	34.1588	51.1901	243.228	5.89652	1.72994	10.8604	10.8955	39.6282	964.871	45.0034	8.94045	136.94	72.899	588.496	97.975	72.4353	103.955	22.2906		infected	DMSO	2.22032	14.5958	16.9202	6.4581	0.69956	0.592846	1.78666	4.01866	12.3728	46.0682	3.58361	0.754519	9.72948	36.6843
																																		infected	DMSO	1.66433	9.38097	12.9137	5.94063	0.540136	0.304671	2.25811	7.28167	17.3876	37.7785	2.96683	0.611054	10.0903	43.0067
Multivariate analysis:																																		infected	DMSO	1.25221	7.40563	37.2837	2.34258	0.215151	0.161933	0.775692	2.18262	5.4239	33.0432	2.8425	0.450503	6.83169	30.1086
(Supp. Fig. 6A)																																		infected	DMSO	2.02247	9.99133	1.43533	3.56714	0.254074	0.111793	0.974433	2.32225	5.03748	28.136	1.44308	0.192932	2.8135	17.9926
Variance explained																																		infected	DMSO	1.19002	8.71438	10.6649	4.17057	0.27499	0.17515	0.579596	1.47477	4.79548	37.9889	1.8831	0.302896	4.08957	15.1468
PC	Variance	Pct
PC1	173728156932332	560413409459134																																Univariate analysis_ Supp. Fig 6A
PC2	747477244102573	241121691645991																																Sne Infected
PC3	319557056278995	103082921380321																																Variance explained
PC4	140156676660709	452118311808738																																PC	Variance	Pct
PC5	0.594013344720043	191617207974207																																PC1	147279258078402	475094380898071
PC6	0.398172330379192	128442687219094																																PC2	882756362362189	284760116891029
PC7	0.195356192565441	0.630181266340131																																PC3	436836789405337	14091509335656
PC8	0.101760608355019	0.328260026951674																																PC4	132358150199072	426961774835716
PC9	0.092007604439222	0.29679872399749																																PC5	0.628348298529525	202692999525653
PC10	0.0743018408855958	0.23968335769547																																PC6	0.352988722795461	11386732993402
PC11	0.0300011441696299	0.0967778844181608																																PC7	0.272874915518657	0.88024166296341
PC12	0.0272656887565384	0.0879538346985109																																PC8	0.136918637097779	0.441673022896061
PC13	0.0126437840950173	0.0407864003065075																																PC9	0.0999999819454056	0.322580586920664
PC14	0.0100654715272462	0.0324692629911168																																PC10	0.0624049918392881	0.201306425288026
PC15	0.00712008057083433	0.0229680018414011																																PC11	0.0585997225722656	0.189031363136341
PC16	0.00349132081001909	0.01126232519361																																PC12	0.0414552287180159	0.133726544251664
PC17	0.00278838949292458	0.00899480481588574																																PC13	0.0237931139191455	0.0767519803843404
PC18	0.00252056866314556	0.00813086665530827																																PC14	0.0191492665107128	0.0617718274539124
PC19	0.00183384386477739	0.00591562537024964																																PC15	0.0136667029398204	0.0440861385155499
PC20	0.00108497805938906	0.00349992922383569																																PC16	0.0122033390299071	0.039365609773894
PC21	0.000847344990037796	0.00273337093560579																																PC17	0.00886118818632732	0.0285844780204108
PC22	2.45377e-18	7.91538e-18																																PC18	0.0064698621579471	0.020870523090152
																																		PC19	0.00585886813940244	0.0188995746432337
Permanova:																																		PC20	0.00352440314181726	0.0113690423929589
																																		PC21	0.00197234279368052	0.00636239610864685
																																		PC22	0.00152183815813063	0.00490915534880849
																																		PC23	0.00108800325166161	0.00350968790858586
																																		PC24	0.000575114480729553	0.0018552080023534
																																		PC25	0.000286630768127417	0.000924615381056184
																																		PC26	7.97855e-18	2.57373e-19
																																		Permanova:
Dispersion test:
																																		Dispersion test:
Univariate analysis: Water-soluble inhibitors_ (Supp. Fig. 6B & C)
lipid	infection	term	contrast	null.value	estimate	std.error	df	statistic	p.value
s1p	infected	inhibitor	ARC39 - untreated	0	-0.406651	0.100286	14	-4.05492	0.00118181
dh_sm_18_0	infected	inhibitor	ARC39 - untreated	0	0.217083	0.0660437	14	3.28696	0.00540061
hex_cer_24_1	infected	inhibitor	ARC39 - untreated	0	0.315954	0.0975769	14	3.238	0.00595315
lac_cer_24_1	infected	inhibitor	ARC39 - untreated	0	0.515557	0.159273	14	3.23693	0.00596582
sm_24_0	infected	inhibitor	ARC39 - untreated	0	0.123902	0.0391717	14	3.16304	0.00691016
hex_cer_16_0	Uninfected	inhibitor	ARC39 - untreated	0	0.26747	0.0851568	14	3.14091	0.0072209
hex_cer_24_1	Uninfected	inhibitor	ARC39 - untreated	0	0.305075	0.0975769	14	3.12651	0.00743056
dh_cer_24_0	infected	inhibitor	ARC39 - untreated	0	0.277467	0.0945379	14	2.93498	0.010864
hex_cer_16_0	infected	inhibitor	ARC39 - untreated	0	0.249407	0.0851568	14	2.9288	0.0109976
dh_cer_24_1	infected	inhibitor	ARC39 - untreated	0	0.330272	0.122919	14	2.6869	0.0177049
lac_cer_24_1	Uninfected	inhibitor	ARC39 - untreated	0	0.376157	0.159273	14	2.36171	0.0332136
sm_22_0	infected	inhibitor	ARC39 - untreated	0	0.199939	0.0860241	14	2.32422	0.0356714
dh_sm_20_0	infected	inhibitor	ARC39 - untreated	0	0.272943	0.119349	14	2.28692	0.0382874
cer_24_0	infected	inhibitor	ARC39 - untreated	0	-0.137681	0.060496	14	-2.27587	0.0390968
sm_20_0	infected	inhibitor	ARC39 - untreated	0	0.276386	0.122498	14	2.25624	0.0405734
dh_sm_22_0	infected	inhibitor	ARC39 - untreated	0	0.227669	0.101063	14	2.25274	0.0408423
dh_sm_24_0	infected	inhibitor	ARC39 - untreated	0	0.103676	0.0470897	14	2.20168	0.0449587
sph	Uninfected	inhibitor	ARC39 - untreated	0	-0.14718	0.0752326	14	-1.95633	0.0706787
dh_cer_22_0	infected	inhibitor	ARC39 - untreated	0	0.22947	0.121492	14	1.88876	0.0798187
dh_sm_24_1	infected	inhibitor	ARC39 - untreated	0	0.200989	0.107793	14	1.86459	0.08334
dh_sm_18_0	Uninfected	inhibitor	ARC39 - untreated	0	0.12181	0.0660437	14	1.84438	0.0863895
sm_18_0	infected	inhibitor	ARC39 - untreated	0	0.162915	0.0893111	14	1.82413	0.089545
dh_sm_16_0	infected	inhibitor	ARC39 - untreated	0	0.122715	0.0697275	14	1.75992	0.100243
sm_24_1	infected	inhibitor	ARC39 - untreated	0	0.121856	0.0694098	14	1.7556	0.101001
lac_cer_16_0	infected	inhibitor	ARC39 - untreated	0	0.234338	0.134467	14	1.74272	0.103295
cer_24_0	Uninfected	inhibitor	ARC39 - untreated	0	-0.101583	0.060496	14	-1.67917	0.115289
sm_24_0	Uninfected	inhibitor	ARC39 - untreated	0	0.0636644	0.0391717	14	1.62527	0.126398
sph	infected	inhibitor	ARC39 - untreated	0	-0.11863	0.0752326	14	-1.57685	0.137152
dh_sm_20_0	Uninfected	inhibitor	ARC39 - untreated	0	0.183528	0.119349	14	1.53774	0.146403
lac_cer_16_0	Uninfected	inhibitor	ARC39 - untreated	0	0.2015	0.134467	14	1.49851	0.156208
dh_cer_16_0	infected	inhibitor	ARC39 - untreated	0	0.255049	0.180155	14	1.41573	0.178717
sm_20_0	Uninfected	inhibitor	ARC39 - untreated	0	0.172426	0.122498	14	1.40758	0.181071
dh_cer_18_0	infected	inhibitor	ARC39 - untreated	0	0.147528	0.107519	14	1.37211	0.191617
sm_18_0	Uninfected	inhibitor	ARC39 - untreated	0	0.0931067	0.0893111	14	1.0425	0.314849
dh_cer_24_1	Uninfected	inhibitor	ARC39 - untreated	0	0.126925	0.122919	14	1.03259	0.319307
dh_cer_20_0	infected	inhibitor	ARC39 - untreated	0	0.0798018	0.0804188	14	0.992328	0.33788
cer_24_1	Uninfected	inhibitor	ARC39 - untreated	0	-0.0716039	0.0752876	14	-0.951073	0.357699
cer_16_0	infected	inhibitor	ARC39 - untreated	0	-0.119779	0.129725	14	-0.923328	0.371476
cer_22_0	Uninfected	inhibitor	ARC39 - untreated	0	-0.106768	0.132975	14	-0.802916	0.435443
cer_16_0	Uninfected	inhibitor	ARC39 - untreated	0	-0.0987975	0.129725	14	-0.761592	0.458942
cer_18_0	Uninfected	inhibitor	ARC39 - untreated	0	-0.133547	0.185905	14	-0.718361	0.484352
dh_sm_22_0	Uninfected	inhibitor	ARC39 - untreated	0	0.065227	0.101063	14	0.645408	0.529099
dh_sph	infected	inhibitor	ARC39 - untreated	0	0.0697276	0.108512	14	0.64258	0.53088
sm_22_0	Uninfected	inhibitor	ARC39 - untreated	0	0.0494583	0.0860241	14	0.574935	0.574459
cer_24_1	infected	inhibitor	ARC39 - untreated	0	-0.0429931	0.0752876	14	-0.571052	0.577017
dh_cer_16_0	Uninfected	inhibitor	ARC39 - untreated	0	0.0961439	0.180155	14	0.533674	0.601938
sm_16_0	Uninfected	inhibitor	ARC39 - untreated	0	-0.0165985	0.0312068	14	-0.531887	0.603143
dh_sm_24_0	Uninfected	inhibitor	ARC39 - untreated	0	-0.0228138	0.0470897	14	-0.484477	0.63554
sm_24_1	Uninfected	inhibitor	ARC39 - untreated	0	0.030931	0.0694098	14	0.445629	0.662679
cer_18_0	infected	inhibitor	ARC39 - untreated	0	-0.0794442	0.185905	14	-0.427337	0.675634
dh_sm_24_1	Uninfected	inhibitor	ARC39 - untreated	0	0.0449973	0.107793	14	0.417444	0.682685
cer_20_0	Uninfected	inhibitor	ARC39 - untreated	0	-0.049077	0.130583	14	-0.375829	0.712678
dh_sm_16_0	Uninfected	inhibitor	ARC39 - untreated	0	0.0208618	0.0697275	14	0.299191	0.76919
dh_cer_22_0	Uninfected	inhibitor	ARC39 - untreated	0	0.0323224	0.121492	14	0.266045	0.794083
dh_cer_20_0	Uninfected	inhibitor	ARC39 - untreated	0	-0.0178715	0.0804188	14	-0.222231	0.827343
s1p	Uninfected	inhibitor	ARC39 - untreated	0	-0.0182196	0.100286	14	-0.181677	0.85844
cer_22_0	infected	inhibitor	ARC39 - untreated	0	-0.0233931	0.132975	14	-0.175921	0.862875
dh_cer_24_0	Uninfected	inhibitor	ARC39 - untreated	0	0.0163722	0.0945379	14	0.173181	0.864988
dh_cer_18_0	Uninfected	inhibitor	ARC39 - untreated	0	0.0164003	0.107519	14	0.152534	0.880942
sm_16_0	infected	inhibitor	ARC39 - untreated	0	0.00380538	0.0312068	14	0.121941	0.904679
cer_20_0	infected	inhibitor	ARC39 - untreated	0	-0.00351684	0.130583	14	-0.0269317	0.978894
dh_sph	Uninfected	inhibitor	ARC39 - untreated	0	0.00215435	0.108512	14	0.0198536	0.98444
sm_24_0	infected	inhibitor	Desipramin - untreated	0	0.132077	0.0497165	14	2.6566	0.0187853
dh_sm_24_0	infected	inhibitor	Desipramin - untreated	0	0.0962076	0.0477814	14	2.0135	0.0636996
dh_sm_24_1	infected	inhibitor	Desipramin - untreated	0	0.279534	0.141257	14	1.9789	0.0678436
cer_24_0	Uninfected	inhibitor	Desipramin - untreated	0	0.142303	0.0737097	14	1.93059	0.0740421
dh_sm_22_0	infected	inhibitor	Desipramin - untreated	0	0.252258	0.134704	14	1.87268	0.0821463
dh_cer_24_1	infected	inhibitor	Desipramin - untreated	0	0.279141	0.152595	14	1.82929	0.0887314
sm_22_0	infected	inhibitor	Desipramin - untreated	0	0.206899	0.113294	14	1.82622	0.0892153
cer_24_1	infected	inhibitor	Desipramin - untreated	0	0.191811	0.110218	14	1.7403	0.103731
cer_20_0	infected	inhibitor	Desipramin - untreated	0	0.310189	0.17875	14	1.73533	0.104631
hex_cer_24_1	Uninfected	inhibitor	Desipramin - untreated	0	0.167285	0.0987849	14	1.69342	0.112498
dh_cer_20_0	infected	inhibitor	Desipramin - untreated	0	0.170948	0.101432	14	1.68536	0.11407
hex_cer_24_1	infected	inhibitor	Desipramin - untreated	0	0.166233	0.0987849	14	1.68278	0.114577
dh_cer_18_0	infected	inhibitor	Desipramin - untreated	0	0.226733	0.135092	14	1.67836	0.11545
dh_cer_22_0	infected	inhibitor	Desipramin - untreated	0	0.262025	0.156216	14	1.67733	0.115654
cer_22_0	infected	inhibitor	Desipramin - untreated	0	0.318	0.191511	14	1.66048	0.119041
sph	infected	inhibitor	Desipramin - untreated	0	0.170718	0.105442	14	1.61907	0.127732
dh_sm_20_0	infected	inhibitor	Desipramin - untreated	0	0.279659	0.173265	14	1.61405	0.128821
sm_20_0	infected	inhibitor	Desipramin - untreated	0	0.295638	0.183225	14	1.61352	0.128938
dh_sm_18_0	infected	inhibitor	Desipramin - untreated	0	0.149881	0.0938028	14	1.59783	0.1324
cer_18_0	infected	inhibitor	Desipramin - untreated	0	0.397301	0.249806	14	1.59043	0.134058
dh_sm_16_0	infected	inhibitor	Desipramin - untreated	0	0.142512	0.0901496	14	1.58084	0.136237
sm_18_0	infected	inhibitor	Desipramin - untreated	0	0.202088	0.128052	14	1.57817	0.13685
dh_cer_16_0	infected	inhibitor	Desipramin - untreated	0	0.361793	0.230174	14	1.57182	0.138312
cer_16_0	Uninfected	inhibitor	Desipramin - untreated	0	0.263029	0.169182	14	1.55471	0.142325
dh_sm_20_0	Uninfected	inhibitor	Desipramin - untreated	0	0.267003	0.173265	14	1.54101	0.14561
cer_22_0	Uninfected	inhibitor	Desipramin - untreated	0	0.289232	0.191511	14	1.51026	0.153214
cer_18_0	Uninfected	inhibitor	Desipramin - untreated	0	0.367225	0.249806	14	1.47004	0.163665
dh_sph	infected	inhibitor	Desipramin - untreated	0	0.217842	0.148912	14	1.46289	0.165584
sm_20_0	Uninfected	inhibitor	Desipramin - untreated	0	0.263755	0.183225	14	1.43951	0.171989
hex_cer_16_0	Uninfected	inhibitor	Desipramin - untreated	0	0.152842	0.10669	14	1.43258	0.173929
cer_16_0	infected	inhibitor	Desipramin - untreated	0	0.242197	0.169182	14	1.43158	0.174209
cer_20_0	Uninfected	inhibitor	Desipramin - untreated	0	0.255793	0.17875	14	1.43102	0.174368
s1p	infected	inhibitor	Desipramin - untreated	0	-0.158849	0.112093	14	-1.41712	0.178318
sm_24_1	infected	inhibitor	Desipramin - untreated	0	0.109727	0.0800536	14	1.37067	0.192055
s1p	Uninfected	inhibitor	Desipramin - untreated	0	0.151624	0.112093	14	1.35266	0.197608
lac_cer_24_1	Uninfected	inhibitor	Desipramin - untreated	0	0.284589	0.211411	14	1.34614	0.19965
sm_16_0	infected	inhibitor	Desipramin - untreated	0	0.0481966	0.0364153	14	1.32353	0.206867
sph	Uninfected	inhibitor	Desipramin - untreated	0	0.136649	0.105442	14	1.29597	0.215945
cer_24_1	Uninfected	inhibitor	Desipramin - untreated	0	0.142387	0.110218	14	1.29188	0.21732
dh_sph	Uninfected	inhibitor	Desipramin - untreated	0	0.191494	0.148912	14	1.28595	0.219324
hex_cer_16_0	infected	inhibitor	Desipramin - untreated	0	0.136705	0.10669	14	1.28133	0.220896
dh_cer_16_0	Uninfected	inhibitor	Desipramin - untreated	0	0.288093	0.230174	14	1.25163	0.231215
dh_cer_18_0	Uninfected	inhibitor	Desipramin - untreated	0	0.157064	0.135092	14	1.16265	0.264409
dh_sm_22_0	Uninfected	inhibitor	Desipramin - untreated	0	0.154022	0.134704	14	1.14341	0.272045
lac_cer_16_0	infected	inhibitor	Desipramin - untreated	0	0.190966	0.171834	14	1.11134	0.285145
lac_cer_24_1	infected	inhibitor	Desipramin - untreated	0	0.233854	0.211411	14	1.10616	0.287304
dh_cer_22_0	Uninfected	inhibitor	Desipramin - untreated	0	0.166568	0.156216	14	1.06627	0.304347
cer_24_0	infected	inhibitor	Desipramin - untreated	0	0.0760671	0.0737097	14	1.03198	0.31958
sm_18_0	Uninfected	inhibitor	Desipramin - untreated	0	0.129079	0.128052	14	1.00802	0.33055
lac_cer_16_0	Uninfected	inhibitor	Desipramin - untreated	0	0.167817	0.171834	14	0.976622	0.345331
dh_cer_20_0	Uninfected	inhibitor	Desipramin - untreated	0	0.095444	0.101432	14	0.94097	0.362674
dh_cer_24_1	Uninfected	inhibitor	Desipramin - untreated	0	0.14342	0.152595	14	0.939877	0.363215
sm_22_0	Uninfected	inhibitor	Desipramin - untreated	0	0.10071	0.113294	14	0.888928	0.38906
dh_sm_18_0	Uninfected	inhibitor	Desipramin - untreated	0	0.0724116	0.0938028	14	0.771955	0.452976
dh_sm_24_0	Uninfected	inhibitor	Desipramin - untreated	0	0.0364864	0.0477814	14	0.763612	0.457775
dh_cer_24_0	infected	inhibitor	Desipramin - untreated	0	0.0671479	0.088651	14	0.757441	0.461345
dh_cer_24_0	Uninfected	inhibitor	Desipramin - untreated	0	0.05821	0.088651	14	0.65662	0.522073
sm_16_0	Uninfected	inhibitor	Desipramin - untreated	0	-0.0203431	0.0364153	14	-0.558642	0.585231
dh_sm_24_1	Uninfected	inhibitor	Desipramin - untreated	0	0.0696439	0.141257	14	0.493028	0.629636
sm_24_0	Uninfected	inhibitor	Desipramin - untreated	0	0.0182403	0.0497165	14	0.366886	0.71919
dh_sm_16_0	Uninfected	inhibitor	Desipramin - untreated	0	0.0262998	0.0901496	14	0.291735	0.774767
sm_24_1	Uninfected	inhibitor	Desipramin - untreated	0	-0.0063032	0.0800536	14	-0.0787373	0.938356
[truncated: 17 more columns]

## Sheet: Supp. 7 & 8
Univariate analysis: Supp. Fig. 7 & 8
Supp. Fig 7A
lipid	infection	term	contrast	null.value	estimate	std.error	df	statistic	p.value
cer_16_0	infected	inhibitor	Myriocin - DMSO	0	-0.303713	0.122547	12	-2.47835	0.0290459
cer_24_0	infected	inhibitor	Myriocin - DMSO	0	-0.35561	0.170891	12	-2.08092	0.0595261
lac_cer_24_1	infected	inhibitor	Myriocin - DMSO	0	-0.460936	0.221638	12	-2.07968	0.0596568
dh_sm_24_0	infected	inhibitor	Myriocin - DMSO	0	-0.359409	0.181566	12	-1.9795	0.0711662
cer_24_1	infected	inhibitor	Myriocin - DMSO	0	-0.386061	0.197969	12	-1.95011	0.0749139
dh_sm_24_1	infected	inhibitor	Myriocin - DMSO	0	-0.487731	0.250899	12	-1.94393	0.075724
hex_cer_24_1	infected	inhibitor	Myriocin - DMSO	0	-0.400941	0.210179	12	-1.90762	0.0806536
dh_sm_18_0	infected	inhibitor	Myriocin - DMSO	0	-0.330812	0.182695	12	-1.81073	0.0952732
dh_cer_16_0	infected	inhibitor	Myriocin - DMSO	0	-0.301485	0.168077	12	-1.79373	0.0980739
dh_sm_16_0	infected	inhibitor	Myriocin - DMSO	0	-0.573141	0.322639	12	-1.77641	0.101002
dh_cer_24_1	infected	inhibitor	Myriocin - DMSO	0	-0.38269	0.225062	12	-1.70038	0.114807
dh_sm_20_0	infected	inhibitor	Myriocin - DMSO	0	-0.124726	0.0755735	12	-1.65039	0.124773
dh_sm_22_0	infected	inhibitor	Myriocin - DMSO	0	-0.319538	0.200296	12	-1.59533	0.136622
cer_22_0	infected	inhibitor	Myriocin - DMSO	0	-0.240739	0.157827	12	-1.52534	0.153089
cer_18_0	infected	inhibitor	Myriocin - DMSO	0	-0.136795	0.0939186	12	-1.45653	0.170909
dh_cer_24_0	infected	inhibitor	Myriocin - DMSO	0	-0.221713	0.152562	12	-1.45326	0.171797
sm_18_0	infected	inhibitor	Myriocin - DMSO	0	-0.208798	0.153834	12	-1.3573	0.199666
dh_cer_22_0	infected	inhibitor	Myriocin - DMSO	0	-0.118638	0.0902121	12	-1.3151	0.213053
dh_sph	infected	inhibitor	Myriocin - DMSO	0	-0.0764387	0.061318	12	-1.24659	0.236331
dh_cer_18_0	infected	inhibitor	Myriocin - DMSO	0	-0.0459151	0.0381574	12	-1.20331	0.25206
sm_24_1	infected	inhibitor	Myriocin - DMSO	0	-0.251556	0.213245	12	-1.17966	0.260995
sm_22_0	infected	inhibitor	Myriocin - DMSO	0	-0.242405	0.20962	12	-1.1564	0.270021
sm_20_0	infected	inhibitor	Myriocin - DMSO	0	-0.140067	0.123578	12	-1.13343	0.279171
cer_20_0	infected	inhibitor	Myriocin - DMSO	0	-0.048356	0.0469363	12	-1.03025	0.323213
dh_cer_20_0	infected	inhibitor	Myriocin - DMSO	0	-0.0295541	0.0295998	12	-0.998454	0.337767
hex_cer_16_0	infected	inhibitor	Myriocin - DMSO	0	-0.154226	0.157058	12	-0.981972	0.345498
lac_cer_16_0	infected	inhibitor	Myriocin - DMSO	0	-0.22025	0.259191	12	-0.849757	0.412093
sm_24_0	infected	inhibitor	Myriocin - DMSO	0	-0.128283	0.15601	12	-0.822273	0.426959
sm_16_0	infected	inhibitor	Myriocin - DMSO	0	-0.0426259	0.0802327	12	-0.531278	0.604921
s1p	infected	inhibitor	Myriocin - DMSO	0	0.142567	0.284409	12	0.501275	0.625247
sph	infected	inhibitor	Myriocin - DMSO	0	-0.0207631	0.0939712	12	-0.220952	0.828845
Supp. Fig 7B
lipid	infection	term	contrast	null.value	estimate	std.error	df	statistic	p.value
dh_sm_16_0	Uninfected	inhibitor	(HPA-12) - DMSO	0	-0.6533	0.235154	12	-2.77817	0.016707
dh_sm_18_0	Uninfected	inhibitor	(HPA-12) - DMSO	0	-0.39692	0.14601	12	-2.71843	0.018662
sm_22_0	Uninfected	inhibitor	(HPA-12) - DMSO	0	-0.44863	0.174291	12	-2.57405	0.024363
dh_sm_22_0	Uninfected	inhibitor	(HPA-12) - DMSO	0	-0.40396	0.162395	12	-2.48753	0.028561
dh_cer_16_0	Uninfected	inhibitor	(HPA-12) - DMSO	0	-0.29041	0.117868	12	-2.46389	0.029825
dh_sm_20_0	Uninfected	inhibitor	(HPA-12) - DMSO	0	-0.161	0.067448	12	-2.3871	0.034316
dh_sm_24_1	Uninfected	inhibitor	(HPA-12) - DMSO	0	-0.45717	0.193014	12	-2.36858	0.035493
sm_20_0	Uninfected	inhibitor	(HPA-12) - DMSO	0	-0.25534	0.112068	12	-2.27841	0.041798
sm_24_0	Uninfected	inhibitor	(HPA-12) - DMSO	0	-0.31706	0.140657	12	-2.25413	0.043671
sm_18_0	Uninfected	inhibitor	(HPA-12) - DMSO	0	-0.30534	0.1382	12	-2.2094	0.047331
dh_sm_24_0	Uninfected	inhibitor	(HPA-12) - DMSO	0	-0.27356	0.129386	12	-2.11431	0.0561
sm_24_1	Uninfected	inhibitor	(HPA-12) - DMSO	0	-0.37191	0.179349	12	-2.07367	0.060295
sm_16_0	Uninfected	inhibitor	(HPA-12) - DMSO	0	-0.13002	0.072724	12	-1.78787	0.099057
dh_sph	Uninfected	inhibitor	(HPA-12) - DMSO	0	-0.09354	0.056339	12	-1.66038	0.122721
dh_cer_24_1	Uninfected	inhibitor	(HPA-12) - DMSO	0	-0.28756	0.179303	12	-1.60376	0.134746
sph	Uninfected	inhibitor	(HPA-12) - DMSO	0	-0.13283	0.084769	12	-1.56694	0.143108
cer_16_0	Uninfected	inhibitor	(HPA-12) - DMSO	0	-0.17717	0.153829	12	-1.15175	0.271855
dh_cer_22_0	Uninfected	inhibitor	(HPA-12) - DMSO	0	-0.08577	0.078466	12	-1.0931	0.295807
dh_cer_18_0	Uninfected	inhibitor	(HPA-12) - DMSO	0	-0.04006	0.036975	12	-1.08357	0.299845
dh_cer_24_0	Uninfected	inhibitor	(HPA-12) - DMSO	0	-0.11264	0.110629	12	-1.01822	0.328664
cer_24_0	Uninfected	inhibitor	(HPA-12) - DMSO	0	-0.22379	0.223157	12	-1.00283	0.335737
s1p	Uninfected	inhibitor	(HPA-12) - DMSO	0	0.282131	0.289554	12	0.974364	0.349109
cer_22_0	Uninfected	inhibitor	(HPA-12) - DMSO	0	-0.15562	0.190557	12	-0.81668	0.430029
cer_24_1	Uninfected	inhibitor	(HPA-12) - DMSO	0	-0.20606	0.263196	12	-0.78293	0.448842
hex_cer_16_0	Uninfected	inhibitor	(HPA-12) - DMSO	0	0.126722	0.192513	12	0.658252	0.522804
cer_18_0	Uninfected	inhibitor	(HPA-12) - DMSO	0	-0.07427	0.120642	12	-0.6156	0.549657
cer_20_0	Uninfected	inhibitor	(HPA-12) - DMSO	0	-0.02513	0.05531	12	-0.45435	0.657687
lac_cer_16_0	Uninfected	inhibitor	(HPA-12) - DMSO	0	0.141194	0.312946	12	0.451175	0.659908
dh_cer_20_0	Uninfected	inhibitor	(HPA-12) - DMSO	0	0.011802	0.031188	12	0.378425	0.711725
hex_cer_24_1	Uninfected	inhibitor	(HPA-12) - DMSO	0	-0.06757	0.259473	12	-0.26042	0.798956
lac_cer_24_1	Uninfected	inhibitor	(HPA-12) - DMSO	0	-0.03688	0.299902	12	-0.12297	0.904164
Supp. Fig 8
lipid	infection	term	contrast	null.value	estimate	std.error	df	statistic	p.value
dh_cer_22_0	infected	inhibitor	AKS466 - DMSO	0	0.486506	0.0940467	10	5.17302	0.000417272
sm_16_0	infected	inhibitor	AKS466 - DMSO	0	-0.383808	0.0927043	10	-4.14013	0.00201141
hex_cer_16_0	infected	inhibitor	AKS466 - DMSO	0	-0.689702	0.192317	10	-3.58629	0.00495961
dh_cer_18_0	infected	inhibitor	AKS466 - DMSO	0	0.275057	0.0842956	10	3.26301	0.0085306
dh_sm_20_0	infected	inhibitor	AKS466 - DMSO	0	0.257611	0.0872466	10	2.95267	0.0144683
dh_cer_20_0	infected	inhibitor	AKS466 - DMSO	0	0.214921	0.0799542	10	2.68806	0.0227756
dh_cer_24_0	infected	inhibitor	AKS466 - DMSO	0	0.303797	0.121214	10	2.50629	0.0311098
cer_16_0	infected	inhibitor	AKS466 - DMSO	0	-0.289185	0.134311	10	-2.1531	0.0567663
sph	infected	inhibitor	AKS466 - DMSO	0	-0.215684	0.102957	10	-2.09488	0.0626134
cer_24_0	infected	inhibitor	AKS466 - DMSO	0	-0.281561	0.149997	10	-1.87711	0.0899498
lac_cer_16_0	infected	inhibitor	AKS466 - DMSO	0	-0.595783	0.317628	10	-1.87573	0.0901551
cer_24_1	infected	inhibitor	AKS466 - DMSO	0	-0.357385	0.192828	10	-1.85339	0.0935238
dh_cer_24_1	infected	inhibitor	AKS466 - DMSO	0	0.33641	0.184656	10	1.82183	0.0984826
dh_sm_24_0	infected	inhibitor	AKS466 - DMSO	0	0.272442	0.152008	10	1.79229	0.103341
sm_24_1	infected	inhibitor	AKS466 - DMSO	0	-0.389992	0.220697	10	-1.7671	0.107658
hex_cer_24_1	infected	inhibitor	AKS466 - DMSO	0	-0.381578	0.238612	10	-1.59916	0.140869
dh_sm_22_0	infected	inhibitor	AKS466 - DMSO	0	0.311459	0.209148	10	1.48918	0.167286
sm_18_0	infected	inhibitor	AKS466 - DMSO	0	-0.220953	0.15654	10	-1.41148	0.188452
dh_cer_16_0	infected	inhibitor	AKS466 - DMSO	0	0.231899	0.164553	10	1.40927	0.189087
dh_sm_18_0	infected	inhibitor	AKS466 - DMSO	0	0.247737	0.182993	10	1.3538	0.205604
cer_20_0	infected	inhibitor	AKS466 - DMSO	0	0.0846113	0.0690937	10	1.22459	0.248795
s1p	infected	inhibitor	AKS466 - DMSO	0	-0.412114	0.373869	10	-1.10229	0.296155
lac_cer_24_1	infected	inhibitor	AKS466 - DMSO	0	-0.247542	0.253617	10	-0.976046	0.352061
dh_sm_24_1	infected	inhibitor	AKS466 - DMSO	0	0.153001	0.228492	10	0.669611	0.518267
sm_22_0	infected	inhibitor	AKS466 - DMSO	0	-0.140297	0.217678	10	-0.644514	0.533747
dh_sm_16_0	infected	inhibitor	AKS466 - DMSO	0	-0.17824	0.28212	10	-0.63179	0.541697
sm_24_0	infected	inhibitor	AKS466 - DMSO	0	-0.0980868	0.189304	10	-0.518144	0.615627
cer_18_0	infected	inhibitor	AKS466 - DMSO	0	0.032603	0.121233	10	0.268927	0.793452
dh_sph	infected	inhibitor	AKS466 - DMSO	0	-0.0149142	0.069881	10	-0.213423	0.835285
sm_20_0	infected	inhibitor	AKS466 - DMSO	0	0.0248281	0.141142	10	0.175909	0.863876
cer_22_0	infected	inhibitor	AKS466 - DMSO	0	0.0284744	0.184671	10	0.15419	0.880527

## Sheet: Supp. 9
AC ko qPCR_analysis_ Supp.Fig. 9D																				SMS1 FRET Analysis_Supp.Fig 9E
Well Position	Sample	Target	Reporter	Cq	Cq Confidence	Cq Mean	Cq SD													24h	Donor Pre	Donor post	donor (post-pre)	Fret efficiency(%)	R1Mean		24h	Donor Pre	Donor post	donor (post-pre)	Fret efficiency(%)	R2Mean		24h	Donor Pre	Donor post	donor (post-pre)	Fret efficiency(%)	R3Mean
A1	Hela con	Gapdh	SYBR	16.9211	0.945224	16.852	0.0625809													WT_							WT_							WT_
A2	Hela con	Gapdh	SYBR	16.8357	0.940522		0.0625809													ROI1	20.47	23.11	2.64	11.4236	13.6456		ROI1	16.4	20.12	3.72	18.4891	15.2472		ROI1	28.51	32.3	3.79	11.7337	10.6059
A3	Hela con	Gapdh	SYBR	16.7992	0.952462		0.0625809				Sample Name	Target Name	Cт Mean	ΔCт	-ΔCт	ΔΔCт (Uninf)	2^(-ΔΔCт)	L2FC		ROI2	21.08	24.6	3.52	14.3089			ROI2	15.98	20.07	4.09	20.3787			ROI2	27.83	30.93	3.1	10.0226
A4	Hela con	Asah 7 8	SYBR	24.5062	0.966289	24.4823	0.0650107			Hu_asah1_exon_7&8	Control	asah1_exon_7&8	24.4823	7.63029	-7.63029	0	1	0		ROI3	25.17	29.99	4.82	16.072			ROI3	24.13	27.63	3.5	12.6674			ROI3	29.77	34.06	4.29	12.5954
A5	Hela con	Asah 7 8	SYBR	24.532	0.968122		0.0650107					GAPDH	16.852							ROI4	28.23	32.27	4.04	12.5194			ROI4	28.47	32.29	3.82	11.8303			ROI4	1.33	1.46	0.13	8.90411
A6	Hela con	Asah 7 8	SYBR	24.4087	0.963484		0.0650107													ROI5	25.14	29.2	4.06	13.9041			ROI5	37.91	43.51	5.6	12.8706			ROI5	34.25	37.96	3.71	9.77345
B1	positive con	Gapdh	SYBR	16.3089	0.950688	16.2931	0.201471				pos. Con	asah1_exon_7&8	27.6458	11.3527	-11.3527	3.72239	0.0757614	-3.72239
B2	positive con	Gapdh	SYBR	16.0842	0.972644		0.201471					GAPDH	16.2931							DKO							DKO							DKO
B3	positive con	Gapdh	SYBR	16.4862	0.988191		0.201471													ROI1	30.09	30.43	0.34	1.11732	3.66277		ROI1	28.69	31.15	2.46	7.89727	5.95304		ROI1	45.55	45.12	-0.43	0	1.56742
B4	positive con	Asah 7 8	SYBR	27.7008	0.976637	27.6458	0.116545				clone1	asah1_exon_7&8	23.9621	7.36134	-7.36134	-0.268952	1.20493	0.268952		ROI2	29.87	31.7	1.83	5.77287			ROI2	34.14	36.13	1.99	5.50789			ROI2	44.6	45.22	0.62	1.37107
B5	positive con	Asah 7 8	SYBR	27.5119	0.972626		0.116545					GAPDH	16.6008							ROI3	34.44	35.51	1.07	3.01324			ROI3	25.1	26.72	1.62	6.06287			ROI3	39.67	40.21	0.54	1.34295
B6	positive con	Asah 7 8	SYBR	27.7247	0.977733		0.116545													ROI4	29.76	31.17	1.41	4.52358			ROI4	28.89	31.01	2.12	6.8365			ROI4	33.15	34.94	1.79	5.12307
C1	clone 1	Gapdh	SYBR	16.7688	0.94199	16.6008	0.152054				clone2	asah1_exon_7&8	23.5849	7.38783	-7.38783	-0.242463	1.18301	0.242463		ROI5	36.35	37.82	1.47	3.88683			ROI5	21.48	22.25	0.77	3.46067			ROI5	45.67	45.36	-0.31	0
C2	clone 1	Gapdh	SYBR	16.561	0.963523		0.152054					GAPDH	16.1971
C3	clone 1	Gapdh	SYBR	16.4726	0.959243		0.152054													SMS1(-aht)							SMS1 (-aht)							SMS1(-aht)
C4	clone 1	Asah 7 8	SYBR	23.9632	0.965684	23.9621	0.140684				clone3	asah1_exon_7&8	24.144	7.35173	-7.35173	-0.27856	1.21298	0.27856		ROI1	24.82	26.94	2.12	7.86934	4.87317		ROI1	32.04	33.59	1.55	4.61447	4.25137		ROI1	61.76	63.26	1.5	2.37117	1.73118
C5	clone 1	Asah 7 8	SYBR	23.8209	0.963347		0.140684					GAPDH	16.7922							ROI2	32.84	34.39	1.55	4.50712			ROI2	30.19	31.12	0.93	2.98843			ROI2	63.15	63.88	0.73	1.14277
C6	clone 1	Asah 7 8	SYBR	24.1023	0.968188		0.140684													ROI3	39.71	42.1	2.39	5.67696			ROI3	32.88	34.53	1.65	4.77845			ROI3	65.39	64.7	-0.69	0
D1	clone 2	Gapdh	SYBR	16.3135	0.93999	16.1971	0.101941				clone4	asah1_exon_7&8	27.8386	11.3284	-11.3284	3.6981	0.077048	-3.6981		ROI4	31.28	31.82	0.54	1.69705			ROI4	24.91	25.57	0.66	2.58115			ROI4	65.63	66.25	0.62	0.935849
D2	clone 2	Gapdh	SYBR	16.1536	0.952419		0.101941					GAPDH	16.5102							ROI5	20.46	21.45	0.99	4.61538			ROI5	19.8	21.13	1.33	6.29437			ROI5	61.72	64.43	2.71	4.20612
D3	clone 2	Gapdh	SYBR	16.1241	0.960954		0.101941
D4	clone 2	Asah 7 8	SYBR	23.5301	0.952336	23.5849	0.0777043				clone5	asah1_exon_7&8	30.9116	14.0155	-14.0155	6.3852	0.0119636	-6.3852		SMS1(+aht)							SMS1 (+aht)							SMS1(+aht)
D5	clone 2	Asah 7 8	SYBR	23.5508	0.953065		0.0777043					GAPDH	16.8961							ROI1	39.75	44.28	4.53	10.2304	12.6136		ROI1	17.43	19.48	2.05	10.5236	14.9377		ROI1	11.8	14.97	3.17	21.1757	15.5272
D6	clone 2	Asah 7 8	SYBR	23.6738	0.905761		0.0777043													ROI2	44.17	50.12	5.95	11.8715			ROI2	42.6	52.56	9.96	18.9498			ROI2	13.26	15.06	1.8	11.9522
E1	clone 3	Gapdh	SYBR	16.8482	0.877408	16.7922	0.0696625				clone6	asah1_exon_7&8	24.4446	7.4901	-7.4901	-0.140192	1.10205	0.140192		ROI3	35.21	40.87	5.66	13.8488			ROI3	22.34	25.86	3.52	13.6118			ROI3	27.07	32.99	5.92	17.9448
E2	clone 3	Gapdh	SYBR	16.7142	0.944726		0.0696625					GAPDH	16.9545							ROI4	29.36	35.19	5.83	16.5672			ROI4	34.76	42.11	7.35	17.4543			ROI4	26.47	30.68	4.21	13.7223
E3	clone 3	Gapdh	SYBR	16.8143	0.949473		0.0696625													ROI5	29.76	33.27	3.51	10.55			ROI5	19.72	22.97	3.25	14.1489			ROI5	25.25	28.97	3.72	12.8409
E4	clone 3	Asah 7 8	SYBR	24.0887	0.936243	24.144	0.0538618				clone7	asah1_exon_7&8	24.7596	7.97747	-7.97747	0.347179	0.78612	-0.347179
E5	clone 3	Asah 7 8	SYBR	24.1963	0.91652		0.0538618					GAPDH	16.7821
E6	clone 3	Asah 7 8	SYBR	24.1469	0.938256		0.0538618													Statistical analysis
F1	clone 4	Gapdh	SYBR	16.9349	0.96266	16.5102	0.342395				clone8	asah1_exon_7&8	30.8811	14.7822	-14.7822	7.15189	0.0070318	-7.15189
F2	clone 4	Gapdh	SYBR	16.7778	0.968946		0.342395					GAPDH	16.099							Number of families	1
F3	clone 4	Gapdh	SYBR	16.6732	0.951581		0.342395													Number of comparisons per family	4
F4	clone 4	Asah 7 8	SYBR	24.8677	0.957043	27.8386	3.17365				clone9	asah1_exon_7&8	26.1196	8.1976	-8.1976	0.567308	0.674875	-0.567308		Alpha	0.05
F5	clone 4	Asah 7 8	SYBR	24.9048	0.95622		3.17365					GAPDH	17.922
F6	clone 4	Asah 7 8	SYBR	25.0612	0.95781		3.17365													Šídák's multiple comparisons test	Mean diff.	95.00% CI of diff.	Below threshold?	Summary	Adjusted P Value
G1	clone 5	Gapdh	SYBR	17.0622	0.916159	16.8961	0.143856				clone10	asah1_exon_7&8	32.7359	15.5126	-15.5126	7.88231	0.00423827	-7.88231		Wildtype vs. SMS1/2 DKO	9.438	4.304 to 14.57	Yes	**	0.0015	A-B
G2	clone 5	Gapdh	SYBR	16.8107	0.954918		0.143856					GAPDH	17.2233							SMS1/2 DKO vs. SMS1-16(+AHT)	-10.63	-15.77 to -5.498	Yes	***	0.0007	B-D
G3	clone 5	Gapdh	SYBR	16.8153	0.939447		0.143856													SMS1-16(-AHT) vs. SMS1-16(+AHT)	-10.74	-15.88 to -5.607	Yes	***	0.0006	C-D
G4	clone 5	Asah 7 8	SYBR	31.0637	0.941708	30.9116	0.145328													Wildtype vs. SMS1-16(-AHT)	9.548	4.413 to 14.68	Yes	**	0.0014	A-C
G5	clone 5	Asah 7 8	SYBR	30.7742	0.932908		0.145328
G6	clone 5	Asah 7 8	SYBR	30.8968	0.947995		0.145328													Test details	Mean 1	Mean 2	Mean diff.	SE of diff.	n1	n2	t	DF
D1	clone 6	GAPDH	SYBR	16.9912	0.919631	16.9545	0.0403653													Wildtype vs. SMS1/2 DKO	13.17	3.728	9.438	1.608	3	3	5.87	8
D2	clone 6	GAPDH	SYBR	16.9113	0.967828		0.0403653													SMS1/2 DKO vs. SMS1-16(+AHT)	3.728	14.36	-10.63	1.608	3	3	6.612	8
D3	clone 6	GAPDH	SYBR	16.9611	0.959481		0.0403653													SMS1-16(-AHT) vs. SMS1-16(+AHT)	3.619	14.36	-10.74	1.608	3	3	6.68	8
D4	clone 6	Asah 7 8	SYBR	24.3978	0.958047	24.4446	0.0508079													Wildtype vs. SMS1-16(-AHT)	13.17	3.619	9.548	1.608	3	3	5.938	8
D5	clone 6	Asah 7 8	SYBR	24.4375	0.959152		0.0508079
D6	clone 6	Asah 7 8	SYBR	24.4986	0.961041		0.0508079
E1	clone 7	GAPDH	SYBR	16.9656	0.947892	16.7821	0.158954
E2	clone 7	GAPDH	SYBR	16.693	0.972426		0.158954
E3	clone 7	GAPDH	SYBR	16.6877	0.965614		0.158954
E4	clone 7	Asah 7 8	SYBR	24.6673	0.97121	24.7596	0.182596
E5	clone 7	Asah 7 8	SYBR	24.6415	0.964879		0.182596
E6	clone 7	Asah 7 8	SYBR	24.9699	0.972651		0.182596
F1	clone 8	GAPDH	SYBR	16.1773	0.894767	16.099	0.0679088
F2	clone 8	GAPDH	SYBR	16.0616	0.915491		0.0679088
F3	clone 8	GAPDH	SYBR	16.0579	0.925654		0.0679088
F4	clone 8	Asah 7 8	SYBR	30.7307	0.907571	30.8811	0.258737
F5	clone 8	Asah 7 8	SYBR	30.7328	0.906817		0.258737
F6	clone 8	Asah 7 8	SYBR	31.1799	0.912164		0.258737
G1	clone 9	GAPDH	SYBR	17.9592	0.947502	17.922	0.0364378
G2	clone 9	GAPDH	SYBR	17.8864	0.981562		0.0364378
G3	clone 9	GAPDH	SYBR	17.9204	0.983058		0.0364378
G4	clone 9	Asah 7 8	SYBR	26.2027	0.977364	26.1196	0.0720972
G5	clone 9	Asah 7 8	SYBR	26.0731	0.977488		0.0720972
G6	clone 9	Asah 7 8	SYBR	26.0831	0.981512		0.0720972
F1	clone 10	GAPDH	SYBR	17.3624	0.943617	17.2233	0.128336
F2	clone 10	GAPDH	SYBR	17.1096	0.965674		0.128336
F3	clone 10	GAPDH	SYBR	17.198	0.967811		0.128336
F4	clone 10	asah 7 8	SYBR	32.5207	0.967446	32.7359	0.525714
F5	clone 10	asah 7 8	SYBR	33.3351	0.98598		0.525714
F6	clone 10	asah 7 8	SYBR	32.352	0.962261		0.525714

## Sheet: Supp. 10
Univariate analysis_ SMS1 & SMS2_ Total SL_Supp. Fig 10
lipid	family	contrast	infection	estimate	SE	df	lower.CL	upper.CL	t.ratio	p.value	FDR
dh_sph	Condition|within Infection	a_sms1_AHT - b_sms2_AHT	no	0.156076	0.0514073	32	0.0513626	0.260789	3.03606	0.00473673	0.00710509
dh_sph	Condition|within Infection	a_sms1_AHT - (c_sms2-M64R_AHT)	no	-0.101476	0.0514073	32	-0.20619	0.00323707	-1.97396	0.0570714	0.0733775
dh_sph	Condition|within Infection	a_sms1_AHT - d_sms12_DKO	no	0.273661	0.0514073	32	0.168948	0.378375	5.32339	7.75411e-06	9.96958e-06
dh_sph	Condition|within Infection	a_sms1_AHT - e_sms1_no_AHT	no	0.229957	0.0514073	32	0.125243	0.33467	4.47323	9.11779e-05	0.000136767
dh_sph	Condition|within Infection	a_sms1_AHT - f_sms2_no_AHT	no	0.233816	0.0514073	32	0.129103	0.338529	4.5483	7.34722e-05	0.000110208
dh_sph	Condition|within Infection	a_sms1_AHT - (g_sms2-M64R_no_AHT)	no	0.229112	0.0514073	32	0.124399	0.333825	4.4568	9.55827e-05	0.000143374
dh_sph	Condition|within Infection	a_sms1_AHT - h_sms12_WT	no	0.194984	0.0514073	32	0.0902706	0.299697	3.79292	0.00062429	0.00112372
dh_sph	Condition|within Infection	b_sms2_AHT - (c_sms2-M64R_AHT)	no	-0.257552	0.0514073	32	-0.362266	-0.152839	-5.01003	1.93008e-05	8.68538e-05
dh_sph	Condition|within Infection	b_sms2_AHT - d_sms12_DKO	no	0.117585	0.0514073	32	0.0128719	0.222299	2.28732	0.0289336	0.0363872
dh_sph	Condition|within Infection	b_sms2_AHT - e_sms1_no_AHT	no	0.0738807	0.0514073	32	-0.0308326	0.178594	1.43716	0.160379	0.206201
dh_sph	Condition|within Infection	b_sms2_AHT - f_sms2_no_AHT	no	0.0777401	0.0514073	32	-0.0269732	0.182453	1.51224	0.140288	0.18037
dh_sph	Condition|within Infection	b_sms2_AHT - (g_sms2-M64R_no_AHT)	no	0.0730361	0.0514073	32	-0.0316772	0.177749	1.42073	0.165066	0.212228
dh_sph	Condition|within Infection	b_sms2_AHT - h_sms12_WT	no	0.038908	0.0514073	32	-0.0658053	0.143621	0.756857	0.454672	0.454672
dh_sph	Condition|within Infection	(c_sms2-M64R_AHT) - d_sms12_DKO	no	0.375137	0.0514073	32	0.270424	0.479851	7.29735	2.70369e-08	6.08329e-08
dh_sph	Condition|within Infection	(c_sms2-M64R_AHT) - e_sms1_no_AHT	no	0.331433	0.0514073	32	0.22672	0.436146	6.44719	2.99311e-07	5.3876e-07
dh_sph	Condition|within Infection	(c_sms2-M64R_AHT) - f_sms2_no_AHT	no	0.335292	0.0514073	32	0.230579	0.440006	6.52227	2.41429e-07	4.34572e-07
dh_sph	Condition|within Infection	(c_sms2-M64R_AHT) - (g_sms2-M64R_no_AHT)	no	0.330588	0.0514073	32	0.225875	0.435302	6.43076	3.13743e-07	5.64737e-07
dh_sph	Condition|within Infection	(c_sms2-M64R_AHT) - h_sms12_WT	no	0.29646	0.0514073	32	0.191747	0.401174	5.76688	2.13378e-06	4.80101e-06
dh_sph	Condition|within Infection	d_sms12_DKO - e_sms1_no_AHT	no	-0.0437046	0.0514073	32	-0.148418	0.0610088	-0.850162	0.401552	0.423626
dh_sph	Condition|within Infection	d_sms12_DKO - f_sms2_no_AHT	no	-0.0398452	0.0514073	32	-0.144558	0.0648682	-0.775087	0.443978	0.451156
dh_sph	Condition|within Infection	d_sms12_DKO - (g_sms2-M64R_no_AHT)	no	-0.0445492	0.0514073	32	-0.149263	0.0601642	-0.866592	0.392617	0.504794
dh_sph	Condition|within Infection	d_sms12_DKO - h_sms12_WT	no	-0.0786772	0.0514073	32	-0.183391	0.0260361	-1.53047	0.135728	0.152694
dh_sph	Condition|within Infection	e_sms1_no_AHT - f_sms2_no_AHT	no	0.00385939	0.0514073	32	-0.100854	0.108573	0.0750747	0.940623	0.96225
dh_sph	Condition|within Infection	e_sms1_no_AHT - (g_sms2-M64R_no_AHT)	no	-0.000844617	0.0514073	32	-0.105558	0.103869	-0.0164299	0.986993	0.997603
dh_sph	Condition|within Infection	e_sms1_no_AHT - h_sms12_WT	no	-0.0349727	0.0514073	32	-0.139686	0.0697406	-0.680305	0.501204	0.501204
dh_sph	Condition|within Infection	f_sms2_no_AHT - (g_sms2-M64R_no_AHT)	no	-0.00470401	0.0514073	32	-0.109417	0.100009	-0.0915046	0.927662	0.995854
dh_sph	Condition|within Infection	f_sms2_no_AHT - h_sms12_WT	no	-0.0388321	0.0514073	32	-0.143545	0.0658812	-0.75538	0.455545	0.455545
dh_sph	Condition|within Infection	(g_sms2-M64R_no_AHT) - h_sms12_WT	no	-0.0341281	0.0514073	32	-0.138841	0.0705853	-0.663875	0.511525	0.511525
sph	Condition|within Infection	a_sms1_AHT - b_sms2_AHT	no	0.120426	0.0644242	32	-0.0108022	0.251653	1.86926	0.0707622	0.0796075
sph	Condition|within Infection	a_sms1_AHT - (c_sms2-M64R_AHT)	no	-0.151128	0.0644242	32	-0.282356	-0.0199001	-2.34582	0.0253449	0.0380173
sph	Condition|within Infection	a_sms1_AHT - d_sms12_DKO	no	0.264575	0.0644242	32	0.133347	0.395803	4.10676	0.000259222	0.000291624
sph	Condition|within Infection	a_sms1_AHT - e_sms1_no_AHT	no	0.141751	0.0644242	32	0.0105234	0.272979	2.20028	0.0351236	0.0451589
sph	Condition|within Infection	a_sms1_AHT - f_sms2_no_AHT	no	0.104152	0.0644242	32	-0.0270761	0.235379	1.61665	0.11577	0.130241
sph	Condition|within Infection	a_sms1_AHT - (g_sms2-M64R_no_AHT)	no	0.0729043	0.0644242	32	-0.0583234	0.204132	1.13163	0.266199	0.299474
sph	Condition|within Infection	a_sms1_AHT - h_sms12_WT	no	0.368998	0.0644242	32	0.23777	0.500226	5.72763	2.39152e-06	7.17456e-06
sph	Condition|within Infection	b_sms2_AHT - (c_sms2-M64R_AHT)	no	-0.271553	0.0644242	32	-0.402781	-0.140326	-4.21508	0.000190684	0.000572053
sph	Condition|within Infection	b_sms2_AHT - d_sms12_DKO	no	0.144149	0.0644242	32	0.0129216	0.275377	2.2375	0.0323442	0.0363872
sph	Condition|within Infection	b_sms2_AHT - e_sms1_no_AHT	no	0.0213257	0.0644242	32	-0.109902	0.152553	0.33102	0.742787	0.742787
sph	Condition|within Infection	b_sms2_AHT - f_sms2_no_AHT	no	-0.0162739	0.0644242	32	-0.147502	0.114954	-0.252605	0.802189	0.802189
sph	Condition|within Infection	b_sms2_AHT - (g_sms2-M64R_no_AHT)	no	-0.0475212	0.0644242	32	-0.178749	0.0837066	-0.73763	0.466114	0.524379
sph	Condition|within Infection	b_sms2_AHT - h_sms12_WT	no	0.248572	0.0644242	32	0.117345	0.3798	3.85837	0.000520505	0.00117114
sph	Condition|within Infection	(c_sms2-M64R_AHT) - d_sms12_DKO	no	0.415703	0.0644242	32	0.284475	0.546931	6.45259	2.94717e-07	5.3049e-07
sph	Condition|within Infection	(c_sms2-M64R_AHT) - e_sms1_no_AHT	no	0.292879	0.0644242	32	0.161651	0.424107	4.5461	7.39383e-05	9.50635e-05
sph	Condition|within Infection	(c_sms2-M64R_AHT) - f_sms2_no_AHT	no	0.255279	0.0644242	32	0.124052	0.386507	3.96248	0.000389128	0.000500308
sph	Condition|within Infection	(c_sms2-M64R_AHT) - (g_sms2-M64R_no_AHT)	no	0.224032	0.0644242	32	0.0928044	0.35526	3.47746	0.00148018	0.0016652
sph	Condition|within Infection	(c_sms2-M64R_AHT) - h_sms12_WT	no	0.520126	0.0644242	32	0.388898	0.651353	8.07345	3.21924e-09	9.65772e-09
sph	Condition|within Infection	d_sms12_DKO - e_sms1_no_AHT	no	-0.122824	0.0644242	32	-0.254051	0.00840404	-1.90648	0.0656013	0.098402
sph	Condition|within Infection	d_sms12_DKO - f_sms2_no_AHT	no	-0.160423	0.0644242	32	-0.291651	-0.0291955	-2.49011	0.0181545	0.0326781
sph	Condition|within Infection	d_sms12_DKO - (g_sms2-M64R_no_AHT)	no	-0.191671	0.0644242	32	-0.322898	-0.0604428	-2.97513	0.00553454	0.0109282
sph	Condition|within Infection	d_sms12_DKO - h_sms12_WT	no	0.104423	0.0644242	32	-0.0268049	0.235651	1.62086	0.114861	0.147678
sph	Condition|within Infection	e_sms1_no_AHT - f_sms2_no_AHT	no	-0.0375995	0.0644242	32	-0.168827	0.0936282	-0.583625	0.563564	0.96225
sph	Condition|within Infection	e_sms1_no_AHT - (g_sms2-M64R_no_AHT)	no	-0.0688469	0.0644242	32	-0.200075	0.0623809	-1.06865	0.293223	0.997603
sph	Condition|within Infection	e_sms1_no_AHT - h_sms12_WT	no	0.227247	0.0644242	32	0.0960188	0.358474	3.52735	0.00129329	0.00166281
sph	Condition|within Infection	f_sms2_no_AHT - (g_sms2-M64R_no_AHT)	no	-0.0312473	0.0644242	32	-0.162475	0.0999804	-0.485025	0.630963	0.995854
sph	Condition|within Infection	f_sms2_no_AHT - h_sms12_WT	no	0.264846	0.0644242	32	0.133618	0.396074	4.11097	0.000256155	0.000329342
sph	Condition|within Infection	(g_sms2-M64R_no_AHT) - h_sms12_WT	no	0.296093	0.0644242	32	0.164866	0.427321	4.596	6.40377e-05	8.23342e-05
s1p	Condition|within Infection	a_sms1_AHT - b_sms2_AHT	no	0.350559	0.0469381	32	0.254949	0.446169	7.46854	1.6808e-08	3.7818e-08
s1p	Condition|within Infection	a_sms1_AHT - (c_sms2-M64R_AHT)	no	0.177795	0.0469381	32	0.0821856	0.273405	3.78787	0.000633091	0.00142445
s1p	Condition|within Infection	a_sms1_AHT - d_sms12_DKO	no	0.318458	0.0469381	32	0.222848	0.414068	6.78463	1.14339e-07	2.0581e-07
s1p	Condition|within Infection	a_sms1_AHT - e_sms1_no_AHT	no	0.0188618	0.0469381	32	-0.076748	0.114472	0.401845	0.69047	0.69047
s1p	Condition|within Infection	a_sms1_AHT - f_sms2_no_AHT	no	0.025449	0.0469381	32	-0.0701608	0.121059	0.542183	0.591448	0.591448
s1p	Condition|within Infection	a_sms1_AHT - (g_sms2-M64R_no_AHT)	no	0.0140912	0.0469381	32	-0.0815186	0.109701	0.300207	0.765961	0.765961
s1p	Condition|within Infection	a_sms1_AHT - h_sms12_WT	no	0.425475	0.0469381	32	0.329865	0.521085	9.06459	2.36758e-10	2.13082e-09
s1p	Condition|within Infection	b_sms2_AHT - (c_sms2-M64R_AHT)	no	-0.172764	0.0469381	32	-0.268374	-0.0771539	-3.68067	0.000850986	0.00191472
s1p	Condition|within Infection	b_sms2_AHT - d_sms12_DKO	no	-0.0321013	0.0469381	32	-0.127711	0.0635085	-0.683907	0.498957	0.498957
s1p	Condition|within Infection	b_sms2_AHT - e_sms1_no_AHT	no	-0.331697	0.0469381	32	-0.427307	-0.236087	-7.0667	5.15545e-08	1.15998e-07
s1p	Condition|within Infection	b_sms2_AHT - f_sms2_no_AHT	no	-0.32511	0.0469381	32	-0.42072	-0.2295	-6.92636	7.65536e-08	1.60382e-07
s1p	Condition|within Infection	b_sms2_AHT - (g_sms2-M64R_no_AHT)	no	-0.336468	0.0469381	32	-0.432078	-0.240858	-7.16833	3.87661e-08	8.72238e-08
s1p	Condition|within Infection	b_sms2_AHT - h_sms12_WT	no	0.0749158	0.0469381	32	-0.020694	0.170526	1.59605	0.120307	0.151153
s1p	Condition|within Infection	(c_sms2-M64R_AHT) - d_sms12_DKO	no	0.140662	0.0469381	32	0.0450526	0.236272	2.99676	0.00523778	0.00673429
s1p	Condition|within Infection	(c_sms2-M64R_AHT) - e_sms1_no_AHT	no	-0.158934	0.0469381	32	-0.254543	-0.0633238	-3.38602	0.00189232	0.00212886
s1p	Condition|within Infection	(c_sms2-M64R_AHT) - f_sms2_no_AHT	no	-0.152346	0.0469381	32	-0.247956	-0.0567366	-3.24569	0.00274638	0.00308968
s1p	Condition|within Infection	(c_sms2-M64R_AHT) - (g_sms2-M64R_no_AHT)	no	-0.163704	0.0469381	32	-0.259314	-0.0680944	-3.48766	0.00143995	0.0016652
s1p	Condition|within Infection	(c_sms2-M64R_AHT) - h_sms12_WT	no	0.24768	0.0469381	32	0.15207	0.343289	5.27673	8.88265e-06	1.59888e-05
s1p	Condition|within Infection	d_sms12_DKO - e_sms1_no_AHT	no	-0.299596	0.0469381	32	-0.395206	-0.203986	-6.38279	3.60029e-07	1.62013e-06
s1p	Condition|within Infection	d_sms12_DKO - f_sms2_no_AHT	no	-0.293009	0.0469381	32	-0.388619	-0.197399	-6.24245	5.38986e-07	2.42544e-06
s1p	Condition|within Infection	d_sms12_DKO - (g_sms2-M64R_no_AHT)	no	-0.304367	0.0469381	32	-0.399976	-0.208757	-6.48443	2.69034e-07	1.21065e-06
s1p	Condition|within Infection	d_sms12_DKO - h_sms12_WT	no	0.107017	0.0469381	32	0.0114073	0.202627	2.27996	0.0294163	0.0441245
s1p	Condition|within Infection	e_sms1_no_AHT - f_sms2_no_AHT	no	0.0065872	0.0469381	32	-0.0890226	0.102197	0.140338	0.889273	0.96225
s1p	Condition|within Infection	e_sms1_no_AHT - (g_sms2-M64R_no_AHT)	no	-0.00477068	0.0469381	32	-0.10038	0.0908391	-0.101638	0.919678	0.997603
s1p	Condition|within Infection	e_sms1_no_AHT - h_sms12_WT	no	0.406613	0.0469381	32	0.311003	0.502223	8.66275	6.71821e-10	1.20928e-09
s1p	Condition|within Infection	f_sms2_no_AHT - (g_sms2-M64R_no_AHT)	no	-0.0113579	0.0469381	32	-0.106968	0.0842519	-0.241976	0.810343	0.995854
s1p	Condition|within Infection	f_sms2_no_AHT - h_sms12_WT	no	0.400026	0.0469381	32	0.304416	0.495636	8.52241	9.71798e-10	1.74924e-09
s1p	Condition|within Infection	(g_sms2-M64R_no_AHT) - h_sms12_WT	no	0.411384	0.0469381	32	0.315774	0.506994	8.76439	5.15028e-10	9.2705e-10
dh_cer_total	Condition|within Infection	a_sms1_AHT - b_sms2_AHT	no	-0.0248622	0.0956281	32	-0.21965	0.169926	-0.259989	0.796538	0.796538
dh_cer_total	Condition|within Infection	a_sms1_AHT - (c_sms2-M64R_AHT)	no	-0.282295	0.0956281	32	-0.477083	-0.0875071	-2.95201	0.00586932	0.0105648
dh_cer_total	Condition|within Infection	a_sms1_AHT - d_sms12_DKO	no	0.55941	0.0956281	32	0.364622	0.754198	5.84985	1.67712e-06	2.51568e-06
dh_cer_total	Condition|within Infection	a_sms1_AHT - e_sms1_no_AHT	no	0.636919	0.0956281	32	0.442131	0.831707	6.66037	1.62782e-07	2.93008e-07
dh_cer_total	Condition|within Infection	a_sms1_AHT - f_sms2_no_AHT	no	0.632357	0.0956281	32	0.437569	0.827145	6.61267	1.8649e-07	3.35682e-07
dh_cer_total	Condition|within Infection	a_sms1_AHT - (g_sms2-M64R_no_AHT)	no	0.62584	0.0956281	32	0.431052	0.820628	6.54452	2.26548e-07	4.07786e-07
dh_cer_total	Condition|within Infection	a_sms1_AHT - h_sms12_WT	no	-0.171751	0.0956281	32	-0.366539	0.0230373	-1.79603	0.0819377	0.105348
dh_cer_total	Condition|within Infection	b_sms2_AHT - (c_sms2-M64R_AHT)	no	-0.257433	0.0956281	32	-0.452221	-0.0626449	-2.69202	0.0112025	0.0168037
dh_cer_total	Condition|within Infection	b_sms2_AHT - d_sms12_DKO	no	0.584272	0.0956281	32	0.389484	0.77906	6.10984	7.90109e-07	2.37033e-06
dh_cer_total	Condition|within Infection	b_sms2_AHT - e_sms1_no_AHT	no	0.661781	0.0956281	32	0.466993	0.856569	6.92036	7.78611e-08	1.4015e-07
dh_cer_total	Condition|within Infection	b_sms2_AHT - f_sms2_no_AHT	no	0.657219	0.0956281	32	0.462431	0.852007	6.87266	8.91011e-08	1.60382e-07
dh_cer_total	Condition|within Infection	b_sms2_AHT - (g_sms2-M64R_no_AHT)	no	0.650702	0.0956281	32	0.455914	0.84549	6.80451	1.08072e-07	1.94529e-07
dh_cer_total	Condition|within Infection	b_sms2_AHT - h_sms12_WT	no	-0.146889	0.0956281	32	-0.341677	0.0478995	-1.53604	0.134358	0.151153
dh_cer_total	Condition|within Infection	(c_sms2-M64R_AHT) - d_sms12_DKO	no	0.841705	0.0956281	32	0.646917	1.03649	8.80186	4.67113e-10	1.40134e-09
dh_cer_total	Condition|within Infection	(c_sms2-M64R_AHT) - e_sms1_no_AHT	no	0.919214	0.0956281	32	0.724426	1.114	9.61238	5.91038e-11	1.32984e-10
dh_cer_total	Condition|within Infection	(c_sms2-M64R_AHT) - f_sms2_no_AHT	no	0.914652	0.0956281	32	0.719864	1.10944	9.56468	6.65914e-11	1.49831e-10
dh_cer_total	Condition|within Infection	(c_sms2-M64R_AHT) - (g_sms2-M64R_no_AHT)	no	0.908135	0.0956281	32	0.713347	1.10292	9.49653	7.9005e-11	1.77761e-10
dh_cer_total	Condition|within Infection	(c_sms2-M64R_AHT) - h_sms12_WT	no	0.110544	0.0956281	32	-0.0842436	0.305332	1.15598	0.256246	0.288277
dh_cer_total	Condition|within Infection	d_sms12_DKO - e_sms1_no_AHT	no	0.0775088	0.0956281	32	-0.117279	0.272297	0.810524	0.423626	0.423626
dh_cer_total	Condition|within Infection	d_sms12_DKO - f_sms2_no_AHT	no	0.0729472	0.0956281	32	-0.121841	0.267735	0.762822	0.451156	0.451156
dh_cer_total	Condition|within Infection	d_sms12_DKO - (g_sms2-M64R_no_AHT)	no	0.06643	0.0956281	32	-0.128358	0.261218	0.69467	0.492275	0.55381
dh_cer_total	Condition|within Infection	d_sms12_DKO - h_sms12_WT	no	-0.73116	0.0956281	32	-0.925948	-0.536372	-7.64588	1.03078e-08	1.8554e-08
dh_cer_total	Condition|within Infection	e_sms1_no_AHT - f_sms2_no_AHT	no	-0.00456162	0.0956281	32	-0.19935	0.190226	-0.0477017	0.96225	0.96225
dh_cer_total	Condition|within Infection	e_sms1_no_AHT - (g_sms2-M64R_no_AHT)	no	-0.0110788	0.0956281	32	-0.205867	0.183709	-0.115853	0.908493	0.997603
dh_cer_total	Condition|within Infection	e_sms1_no_AHT - h_sms12_WT	no	-0.808669	0.0956281	32	-1.00346	-0.613881	-8.4564	1.15709e-09	1.73563e-09
dh_cer_total	Condition|within Infection	f_sms2_no_AHT - (g_sms2-M64R_no_AHT)	no	-0.00651723	0.0956281	32	-0.201305	0.188271	-0.0681518	0.946089	0.995854
dh_cer_total	Condition|within Infection	f_sms2_no_AHT - h_sms12_WT	no	-0.804108	0.0956281	32	-0.998896	-0.60932	-8.4087	1.31306e-09	1.96958e-09
dh_cer_total	Condition|within Infection	(g_sms2-M64R_no_AHT) - h_sms12_WT	no	-0.79759	0.0956281	32	-0.992378	-0.602802	-8.34055	1.57385e-09	2.36077e-09
cer_total	Condition|within Infection	a_sms1_AHT - b_sms2_AHT	no	-0.169784	0.0643439	32	-0.300848	-0.0387198	-2.6387	0.0127478	0.01639
cer_total	Condition|within Infection	a_sms1_AHT - (c_sms2-M64R_AHT)	no	-0.294679	0.0643439	32	-0.425743	-0.163615	-4.57975	6.71095e-05	0.000201328
cer_total	Condition|within Infection	a_sms1_AHT - d_sms12_DKO	no	0.0422738	0.0643439	32	-0.0887905	0.173338	0.656997	0.515881	0.515881
cer_total	Condition|within Infection	a_sms1_AHT - e_sms1_no_AHT	no	-0.131276	0.0643439	32	-0.26234	-0.000211407	-2.04022	0.0496531	0.0558597
cer_total	Condition|within Infection	a_sms1_AHT - f_sms2_no_AHT	no	-0.13652	0.0643439	32	-0.267585	-0.00545594	-2.12173	0.0416988	0.0536128
cer_total	Condition|within Infection	a_sms1_AHT - (g_sms2-M64R_no_AHT)	no	-0.146811	0.0643439	32	-0.277876	-0.0157469	-2.28166	0.0293041	0.0376767
cer_total	Condition|within Infection	a_sms1_AHT - h_sms12_WT	no	-0.0195315	0.0643439	32	-0.150596	0.111533	-0.303549	0.763436	0.763436
cer_total	Condition|within Infection	b_sms2_AHT - (c_sms2-M64R_AHT)	no	-0.124895	0.0643439	32	-0.255959	0.00616952	-1.94105	0.0611034	0.0687413
cer_total	Condition|within Infection	b_sms2_AHT - d_sms12_DKO	no	0.212058	0.0643439	32	0.0809936	0.343122	3.29569	0.0024066	0.00523265
cer_total	Condition|within Infection	b_sms2_AHT - e_sms1_no_AHT	no	0.0385084	0.0643439	32	-0.092556	0.169573	0.598477	0.553735	0.622952
cer_total	Condition|within Infection	b_sms2_AHT - f_sms2_no_AHT	no	0.0332638	0.0643439	32	-0.0978005	0.164328	0.516969	0.608733	0.684824
cer_total	Condition|within Infection	b_sms2_AHT - (g_sms2-M64R_no_AHT)	no	0.0229729	0.0643439	32	-0.108091	0.154037	0.357032	0.723412	0.723412
cer_total	Condition|within Infection	b_sms2_AHT - h_sms12_WT	no	0.150253	0.0643439	32	0.0191882	0.281317	2.33515	0.0259682	0.0460958
cer_total	Condition|within Infection	(c_sms2-M64R_AHT) - d_sms12_DKO	no	0.336953	0.0643439	32	0.205888	0.468017	5.23674	9.97932e-06	1.4969e-05
cer_total	Condition|within Infection	(c_sms2-M64R_AHT) - e_sms1_no_AHT	no	0.163403	0.0643439	32	0.0323388	0.294468	2.53953	0.0161581	0.0161581
cer_total	Condition|within Infection	(c_sms2-M64R_AHT) - f_sms2_no_AHT	no	0.158159	0.0643439	32	0.0270943	0.289223	2.45802	0.0195695	0.0195695
cer_total	Condition|within Infection	(c_sms2-M64R_AHT) - (g_sms2-M64R_no_AHT)	no	0.147868	0.0643439	32	0.0168033	0.278932	2.29808	0.0282411	0.0282411
cer_total	Condition|within Infection	(c_sms2-M64R_AHT) - h_sms12_WT	no	0.275147	0.0643439	32	0.144083	0.406212	4.2762	0.000160239	0.000240359
cer_total	Condition|within Infection	d_sms12_DKO - e_sms1_no_AHT	no	-0.17355	0.0643439	32	-0.304614	-0.0424852	-2.69722	0.0110617	0.0248887
cer_total	Condition|within Infection	d_sms12_DKO - f_sms2_no_AHT	no	-0.178794	0.0643439	32	-0.309858	-0.0477297	-2.77872	0.00905684	0.0203779
cer_total	Condition|within Infection	d_sms12_DKO - (g_sms2-M64R_no_AHT)	no	-0.189085	0.0643439	32	-0.320149	-0.0580207	-2.93866	0.00607121	0.0109282
cer_total	Condition|within Infection	d_sms12_DKO - h_sms12_WT	no	-0.0618053	0.0643439	32	-0.19287	0.069259	-0.960546	0.343983	0.343983
cer_total	Condition|within Infection	e_sms1_no_AHT - f_sms2_no_AHT	no	-0.00524453	0.0643439	32	-0.136309	0.12582	-0.0815078	0.935546	0.96225
cer_total	Condition|within Infection	e_sms1_no_AHT - (g_sms2-M64R_no_AHT)	no	-0.0155355	0.0643439	32	-0.1466	0.115529	-0.241445	0.810751	0.997603
cer_total	Condition|within Infection	e_sms1_no_AHT - h_sms12_WT	no	0.111744	0.0643439	32	-0.0193201	0.242809	1.73667	0.0920648	0.103573
cer_total	Condition|within Infection	f_sms2_no_AHT - (g_sms2-M64R_no_AHT)	no	-0.010291	0.0643439	32	-0.141355	0.120773	-0.159937	0.873936	0.995854
cer_total	Condition|within Infection	f_sms2_no_AHT - h_sms12_WT	no	0.116989	0.0643439	32	-0.0140756	0.248053	1.81818	0.0784091	0.0882102
cer_total	Condition|within Infection	(g_sms2-M64R_no_AHT) - h_sms12_WT	no	0.12728	0.0643439	32	-0.00378462	0.258344	1.97811	0.0565798	0.0636523
dh_sm_total	Condition|within Infection	a_sms1_AHT - b_sms2_AHT	no	0.507948	0.0624054	32	0.380833	0.635064	8.13949	2.69495e-09	8.08486e-09
dh_sm_total	Condition|within Infection	a_sms1_AHT - (c_sms2-M64R_AHT)	no	-0.00717912	0.0624054	32	-0.134295	0.119937	-0.11504	0.909132	0.909132
dh_sm_total	Condition|within Infection	a_sms1_AHT - d_sms12_DKO	no	2.10083	0.0624054	32	1.97372	2.22795	33.6643	1.48307e-26	1.33476e-25
dh_sm_total	Condition|within Infection	a_sms1_AHT - e_sms1_no_AHT	no	2.22336	0.0624054	32	2.09624	2.35048	35.6277	2.53076e-27	2.27768e-26
dh_sm_total	Condition|within Infection	a_sms1_AHT - f_sms2_no_AHT	no	2.20768	0.0624054	32	2.08056	2.33479	35.3764	3.15692e-27	2.84123e-26
dh_sm_total	Condition|within Infection	a_sms1_AHT - (g_sms2-M64R_no_AHT)	no	2.22355	0.0624054	32	2.09643	2.35066	35.6307	2.52405e-27	2.27165e-26
dh_sm_total	Condition|within Infection	a_sms1_AHT - h_sms12_WT	no	0.19585	0.0624054	32	0.0687341	0.322965	3.13835	0.00363706	0.00545558
dh_sm_total	Condition|within Infection	b_sms2_AHT - (c_sms2-M64R_AHT)	no	-0.515128	0.0624054	32	-0.642243	-0.388012	-8.25453	1.97982e-09	1.78184e-08
dh_sm_total	Condition|within Infection	b_sms2_AHT - d_sms12_DKO	no	1.59288	0.0624054	32	1.46577	1.72	25.5248	7.6244e-23	6.86196e-22
dh_sm_total	Condition|within Infection	b_sms2_AHT - e_sms1_no_AHT	no	1.71541	0.0624054	32	1.5883	1.84253	27.4882	7.86949e-24	7.08254e-23
dh_sm_total	Condition|within Infection	b_sms2_AHT - f_sms2_no_AHT	no	1.69973	0.0624054	32	1.57261	1.82684	27.2369	1.04354e-23	9.39188e-23
dh_sm_total	Condition|within Infection	b_sms2_AHT - (g_sms2-M64R_no_AHT)	no	1.7156	0.0624054	32	1.58848	1.84272	27.4912	7.84288e-24	7.0586e-23
dh_sm_total	Condition|within Infection	b_sms2_AHT - h_sms12_WT	no	-0.312099	0.0624054	32	-0.439214	-0.184983	-5.00115	1.98055e-05	5.94166e-05
dh_sm_total	Condition|within Infection	(c_sms2-M64R_AHT) - d_sms12_DKO	no	2.10801	0.0624054	32	1.9809	2.23513	33.7793	1.33356e-26	1.2002e-25
dh_sm_total	Condition|within Infection	(c_sms2-M64R_AHT) - e_sms1_no_AHT	no	2.23054	0.0624054	32	2.10342	2.35765	35.7427	2.28831e-27	2.05948e-26
dh_sm_total	Condition|within Infection	(c_sms2-M64R_AHT) - f_sms2_no_AHT	no	2.21486	0.0624054	32	2.08774	2.34197	35.4914	2.85255e-27	2.56729e-26
dh_sm_total	Condition|within Infection	(c_sms2-M64R_AHT) - (g_sms2-M64R_no_AHT)	no	2.23073	0.0624054	32	2.10361	2.35784	35.7457	2.28226e-27	2.05404e-26
dh_sm_total	Condition|within Infection	(c_sms2-M64R_AHT) - h_sms12_WT	no	0.203029	0.0624054	32	0.0759132	0.330145	3.25339	0.00269123	0.00346015
dh_sm_total	Condition|within Infection	d_sms12_DKO - e_sms1_no_AHT	no	0.122528	0.0624054	32	-0.00458749	0.249644	1.96342	0.0583368	0.098402
dh_sm_total	Condition|within Infection	d_sms12_DKO - f_sms2_no_AHT	no	0.106845	0.0624054	32	-0.0202707	0.233961	1.71211	0.0965528	0.144829
dh_sm_total	Condition|within Infection	d_sms12_DKO - (g_sms2-M64R_no_AHT)	no	0.122717	0.0624054	32	-0.00439851	0.249833	1.96645	0.0579709	0.0869563
dh_sm_total	Condition|within Infection	d_sms12_DKO - h_sms12_WT	no	-1.90498	0.0624054	32	-2.0321	-1.77787	-30.5259	3.09921e-25	2.78929e-24
dh_sm_total	Condition|within Infection	e_sms1_no_AHT - f_sms2_no_AHT	no	-0.0156832	0.0624054	32	-0.142799	0.111432	-0.251312	0.80318	0.96225
dh_sm_total	Condition|within Infection	e_sms1_no_AHT - (g_sms2-M64R_no_AHT)	no	0.000188979	0.0624054	32	-0.126927	0.127305	0.00302824	0.997603	0.997603
dh_sm_total	Condition|within Infection	e_sms1_no_AHT - h_sms12_WT	no	-2.02751	0.0624054	32	-2.15463	-1.90039	-32.4893	4.47962e-26	4.03166e-25
dh_sm_total	Condition|within Infection	f_sms2_no_AHT - (g_sms2-M64R_no_AHT)	no	0.0158722	0.0624054	32	-0.111243	0.142988	0.25434	0.80086	0.995854
dh_sm_total	Condition|within Infection	f_sms2_no_AHT - h_sms12_WT	no	-2.01183	0.0624054	32	-2.13894	-1.88471	-32.238	5.70234e-26	5.1321e-25
dh_sm_total	Condition|within Infection	(g_sms2-M64R_no_AHT) - h_sms12_WT	no	-2.0277	0.0624054	32	-2.15481	-1.90058	-32.4924	4.46666e-26	4.01999e-25
sm_total	Condition|within Infection	a_sms1_AHT - b_sms2_AHT	no	0.224378	0.0586108	32	0.104992	0.343765	3.82828	0.000565949	0.00101871
sm_total	Condition|within Infection	a_sms1_AHT - (c_sms2-M64R_AHT)	no	0.0970079	0.0586108	32	-0.0223785	0.216394	1.65512	0.107677	0.121137
sm_total	Condition|within Infection	a_sms1_AHT - d_sms12_DKO	no	1.42064	0.0586108	32	1.30125	1.54003	24.2385	3.68531e-22	1.65839e-21
sm_total	Condition|within Infection	a_sms1_AHT - e_sms1_no_AHT	no	1.48962	0.0586108	32	1.37024	1.60901	25.4155	8.69178e-23	3.9113e-22
sm_total	Condition|within Infection	a_sms1_AHT - f_sms2_no_AHT	no	1.4743	0.0586108	32	1.35491	1.59369	25.1541	1.19167e-22	5.3625e-22
sm_total	Condition|within Infection	a_sms1_AHT - (g_sms2-M64R_no_AHT)	no	1.45241	0.0586108	32	1.33302	1.5718	24.7806	1.8802e-22	8.46088e-22
sm_total	Condition|within Infection	a_sms1_AHT - h_sms12_WT	no	0.0918913	0.0586108	32	-0.0274951	0.211278	1.56782	0.12676	0.142605
sm_total	Condition|within Infection	b_sms2_AHT - (c_sms2-M64R_AHT)	no	-0.127371	0.0586108	32	-0.246757	-0.00798422	-2.17316	0.0372811	0.0479328
sm_total	Condition|within Infection	b_sms2_AHT - d_sms12_DKO	no	1.19626	0.0586108	32	1.07687	1.31565	20.4102	6.51725e-20	2.93276e-19
sm_total	Condition|within Infection	b_sms2_AHT - e_sms1_no_AHT	no	1.26524	0.0586108	32	1.14586	1.38463	21.5872	1.21939e-20	5.48726e-20
sm_total	Condition|within Infection	b_sms2_AHT - f_sms2_no_AHT	no	1.24992	0.0586108	32	1.13054	1.36931	21.3258	1.75709e-20	7.9069e-20
sm_total	Condition|within Infection	b_sms2_AHT - (g_sms2-M64R_no_AHT)	no	1.22803	0.0586108	32	1.10864	1.34742	20.9523	2.98139e-20	1.34163e-19
sm_total	Condition|within Infection	b_sms2_AHT - h_sms12_WT	no	-0.132487	0.0586108	32	-0.251873	-0.0131008	-2.26045	0.0307306	0.0460958
sm_total	Condition|within Infection	(c_sms2-M64R_AHT) - d_sms12_DKO	no	1.32363	0.0586108	32	1.20425	1.44302	22.5834	3.13817e-21	1.41218e-20
sm_total	Condition|within Infection	(c_sms2-M64R_AHT) - e_sms1_no_AHT	no	1.39262	0.0586108	32	1.27323	1.512	23.7604	6.74859e-22	3.03687e-21
sm_total	Condition|within Infection	(c_sms2-M64R_AHT) - f_sms2_no_AHT	no	1.37729	0.0586108	32	1.25791	1.49668	23.4989	9.43806e-22	4.24713e-21
sm_total	Condition|within Infection	(c_sms2-M64R_AHT) - (g_sms2-M64R_no_AHT)	no	1.3554	0.0586108	32	1.23601	1.47479	23.1254	1.53295e-21	6.89826e-21
sm_total	Condition|within Infection	(c_sms2-M64R_AHT) - h_sms12_WT	no	-0.00511655	0.0586108	32	-0.124503	0.11427	-0.087297	0.930979	0.930979
sm_total	Condition|within Infection	d_sms12_DKO - e_sms1_no_AHT	no	0.0689836	0.0586108	32	-0.0504027	0.18837	1.17698	0.247885	0.31871
sm_total	Condition|within Infection	d_sms12_DKO - f_sms2_no_AHT	no	0.0536608	0.0586108	32	-0.0657256	0.173047	0.915544	0.366754	0.451156
sm_total	Condition|within Infection	d_sms12_DKO - (g_sms2-M64R_no_AHT)	no	0.0317697	0.0586108	32	-0.0876167	0.151156	0.542044	0.591543	0.591543
sm_total	Condition|within Infection	d_sms12_DKO - h_sms12_WT	no	-1.32875	0.0586108	32	-1.44813	-1.20936	-22.6707	2.79332e-21	1.25699e-20
sm_total	Condition|within Infection	e_sms1_no_AHT - f_sms2_no_AHT	no	-0.0153228	0.0586108	32	-0.134709	0.104064	-0.261434	0.795433	0.96225
sm_total	Condition|within Infection	e_sms1_no_AHT - (g_sms2-M64R_no_AHT)	no	-0.037214	0.0586108	32	-0.1566	0.0821724	-0.634933	0.529986	0.997603
sm_total	Condition|within Infection	e_sms1_no_AHT - h_sms12_WT	no	-1.39773	0.0586108	32	-1.51712	-1.27835	-23.8477	6.03798e-22	1.81139e-21
sm_total	Condition|within Infection	f_sms2_no_AHT - (g_sms2-M64R_no_AHT)	no	-0.0218911	0.0586108	32	-0.141277	0.0974952	-0.3735	0.71124	0.995854
sm_total	Condition|within Infection	f_sms2_no_AHT - h_sms12_WT	no	-1.38241	0.0586108	32	-1.5018	-1.26302	-23.5862	8.43492e-22	2.53047e-21
sm_total	Condition|within Infection	(g_sms2-M64R_no_AHT) - h_sms12_WT	no	-1.36052	0.0586108	32	-1.4799	-1.24113	-23.2127	1.3678e-21	4.10341e-21
hex_cer_total	Condition|within Infection	a_sms1_AHT - b_sms2_AHT	no	-0.529943	0.0576689	32	-0.647411	-0.412475	-9.1894	1.71983e-10	7.73922e-10
hex_cer_total	Condition|within Infection	a_sms1_AHT - (c_sms2-M64R_AHT)	no	-0.519837	0.0576689	32	-0.637305	-0.402369	-9.01416	2.6956e-10	1.21302e-09
hex_cer_total	Condition|within Infection	a_sms1_AHT - d_sms12_DKO	no	-0.66712	0.0576689	32	-0.784587	-0.549652	-11.5681	5.72402e-13	1.2879e-12
hex_cer_total	Condition|within Infection	a_sms1_AHT - e_sms1_no_AHT	no	-1.2488	0.0576689	32	-1.36627	-1.13133	-21.6547	1.11041e-20	3.33124e-20
hex_cer_total	Condition|within Infection	a_sms1_AHT - f_sms2_no_AHT	no	-1.27124	0.0576689	32	-1.3887	-1.15377	-22.0437	6.50316e-21	1.95095e-20
hex_cer_total	Condition|within Infection	a_sms1_AHT - (g_sms2-M64R_no_AHT)	no	-1.27921	0.0576689	32	-1.39667	-1.16174	-22.1819	5.38819e-21	1.61646e-20
hex_cer_total	Condition|within Infection	a_sms1_AHT - h_sms12_WT	no	0.243552	0.0576689	32	0.126085	0.36102	4.22329	0.00018629	0.000419152
hex_cer_total	Condition|within Infection	b_sms2_AHT - (c_sms2-M64R_AHT)	no	0.0101063	0.0576689	32	-0.107362	0.127574	0.175246	0.86199	0.86199
hex_cer_total	Condition|within Infection	b_sms2_AHT - d_sms12_DKO	no	-0.137177	0.0576689	32	-0.254644	-0.0197087	-2.37869	0.0235105	0.0352657
hex_cer_total	Condition|within Infection	b_sms2_AHT - e_sms1_no_AHT	no	-0.718858	0.0576689	32	-0.836326	-0.60139	-12.4653	7.9941e-14	2.39823e-13
hex_cer_total	Condition|within Infection	b_sms2_AHT - f_sms2_no_AHT	no	-0.741293	0.0576689	32	-0.858761	-0.623825	-12.8543	3.50518e-14	1.05155e-13
hex_cer_total	Condition|within Infection	b_sms2_AHT - (g_sms2-M64R_no_AHT)	no	-0.749263	0.0576689	32	-0.866731	-0.631795	-12.9925	2.62596e-14	7.87788e-14
hex_cer_total	Condition|within Infection	b_sms2_AHT - h_sms12_WT	no	0.773495	0.0576689	32	0.656028	0.890963	13.4127	1.10554e-14	4.97494e-14
hex_cer_total	Condition|within Infection	(c_sms2-M64R_AHT) - d_sms12_DKO	no	-0.147283	0.0576689	32	-0.264751	-0.029815	-2.55394	0.0156152	0.0175671
hex_cer_total	Condition|within Infection	(c_sms2-M64R_AHT) - e_sms1_no_AHT	no	-0.728965	0.0576689	32	-0.846432	-0.611497	-12.6405	5.50236e-14	1.65071e-13
hex_cer_total	Condition|within Infection	(c_sms2-M64R_AHT) - f_sms2_no_AHT	no	-0.751399	0.0576689	32	-0.868867	-0.633931	-13.0295	2.43126e-14	7.29379e-14
hex_cer_total	Condition|within Infection	(c_sms2-M64R_AHT) - (g_sms2-M64R_no_AHT)	no	-0.75937	0.0576689	32	-0.876837	-0.641902	-13.1677	1.82631e-14	5.47893e-14
hex_cer_total	Condition|within Infection	(c_sms2-M64R_AHT) - h_sms12_WT	no	0.763389	0.0576689	32	0.645921	0.880857	13.2374	1.58217e-14	7.11976e-14
hex_cer_total	Condition|within Infection	d_sms12_DKO - e_sms1_no_AHT	no	-0.581682	0.0576689	32	-0.69915	-0.464214	-10.0866	1.83527e-11	1.65174e-10
hex_cer_total	Condition|within Infection	d_sms12_DKO - f_sms2_no_AHT	no	-0.604116	0.0576689	32	-0.721584	-0.486649	-10.4756	7.18618e-12	6.46756e-11
hex_cer_total	Condition|within Infection	d_sms12_DKO - (g_sms2-M64R_no_AHT)	no	-0.612087	0.0576689	32	-0.729555	-0.494619	-10.6138	5.17457e-12	4.65711e-11
hex_cer_total	Condition|within Infection	d_sms12_DKO - h_sms12_WT	no	0.910672	0.0576689	32	0.793204	1.02814	15.7914	1.16032e-16	2.61072e-16
hex_cer_total	Condition|within Infection	e_sms1_no_AHT - f_sms2_no_AHT	no	-0.0224347	0.0576689	32	-0.139903	0.0950331	-0.389026	0.699834	0.96225
hex_cer_total	Condition|within Infection	e_sms1_no_AHT - (g_sms2-M64R_no_AHT)	no	-0.030405	0.0576689	32	-0.147873	0.0870628	-0.527233	0.601668	0.997603
hex_cer_total	Condition|within Infection	e_sms1_no_AHT - h_sms12_WT	no	1.49235	0.0576689	32	1.37489	1.60982	25.8779	5.00947e-23	2.25426e-22
hex_cer_total	Condition|within Infection	f_sms2_no_AHT - (g_sms2-M64R_no_AHT)	no	-0.00797027	0.0576689	32	-0.125438	0.109498	-0.138207	0.890943	0.995854
hex_cer_total	Condition|within Infection	f_sms2_no_AHT - h_sms12_WT	no	1.51479	0.0576689	32	1.39732	1.63226	26.267	3.17303e-23	1.42787e-22
hex_cer_total	Condition|within Infection	(g_sms2-M64R_no_AHT) - h_sms12_WT	no	1.52276	0.0576689	32	1.40529	1.64023	26.4052	2.70188e-23	1.21584e-22
lac_cer_total	Condition|within Infection	a_sms1_AHT - b_sms2_AHT	no	-0.672873	0.0703221	32	-0.816115	-0.529632	-9.56845	6.59656e-11	5.93691e-10
lac_cer_total	Condition|within Infection	a_sms1_AHT - (c_sms2-M64R_AHT)	no	-0.880383	0.0703221	32	-1.02362	-0.737142	-12.5193	7.12167e-14	6.4095e-13
lac_cer_total	Condition|within Infection	a_sms1_AHT - d_sms12_DKO	no	-0.899597	0.0703221	32	-1.04284	-0.756356	-12.7925	3.99078e-14	1.19723e-13
lac_cer_total	Condition|within Infection	a_sms1_AHT - e_sms1_no_AHT	no	-0.503649	0.0703221	32	-0.64689	-0.360407	-7.16203	3.94566e-08	8.87773e-08
lac_cer_total	Condition|within Infection	a_sms1_AHT - f_sms2_no_AHT	no	-0.559309	0.0703221	32	-0.702551	-0.416068	-7.95354	4.45178e-09	1.00165e-08
lac_cer_total	Condition|within Infection	a_sms1_AHT - (g_sms2-M64R_no_AHT)	no	-0.558941	0.0703221	32	-0.702182	-0.4157	-7.9483	4.51544e-09	1.01597e-08
lac_cer_total	Condition|within Infection	a_sms1_AHT - h_sms12_WT	no	0.416158	0.0703221	32	0.272917	0.5594	5.91789	1.37683e-06	6.19574e-06
lac_cer_total	Condition|within Infection	b_sms2_AHT - (c_sms2-M64R_AHT)	no	-0.20751	0.0703221	32	-0.350751	-0.0642684	-2.95085	0.00588665	0.010596
lac_cer_total	Condition|within Infection	b_sms2_AHT - d_sms12_DKO	no	-0.226723	0.0703221	32	-0.369965	-0.0834821	-3.22407	0.00290703	0.00523265
lac_cer_total	Condition|within Infection	b_sms2_AHT - e_sms1_no_AHT	no	0.169225	0.0703221	32	0.0259834	0.312466	2.40642	0.0220572	0.0330858
lac_cer_total	Condition|within Infection	b_sms2_AHT - f_sms2_no_AHT	no	0.113564	0.0703221	32	-0.0296773	0.256805	1.61491	0.116148	0.174222
lac_cer_total	Condition|within Infection	b_sms2_AHT - (g_sms2-M64R_no_AHT)	no	0.113932	0.0703221	32	-0.0293089	0.257174	1.62015	0.115014	0.172521
lac_cer_total	Condition|within Infection	b_sms2_AHT - h_sms12_WT	no	1.08903	0.0703221	32	0.94579	1.23227	15.4863	2.01931e-16	1.81738e-15
lac_cer_total	Condition|within Infection	(c_sms2-M64R_AHT) - d_sms12_DKO	no	-0.0192137	0.0703221	32	-0.162455	0.124028	-0.273224	0.786437	0.786437
lac_cer_total	Condition|within Infection	(c_sms2-M64R_AHT) - e_sms1_no_AHT	no	0.376735	0.0703221	32	0.233493	0.519976	5.35727	7.02553e-06	1.05383e-05
lac_cer_total	Condition|within Infection	(c_sms2-M64R_AHT) - f_sms2_no_AHT	no	0.321074	0.0703221	32	0.177833	0.464315	4.56576	6.98686e-05	0.000104803
lac_cer_total	Condition|within Infection	(c_sms2-M64R_AHT) - (g_sms2-M64R_no_AHT)	no	0.321442	0.0703221	32	0.178201	0.464684	4.571	6.88222e-05	0.000103233
lac_cer_total	Condition|within Infection	(c_sms2-M64R_AHT) - h_sms12_WT	no	1.29654	0.0703221	32	1.1533	1.43978	18.4372	1.31624e-18	1.18461e-17
lac_cer_total	Condition|within Infection	d_sms12_DKO - e_sms1_no_AHT	no	0.395948	0.0703221	32	0.252707	0.53919	5.6305	3.17177e-06	9.5153e-06
lac_cer_total	Condition|within Infection	d_sms12_DKO - f_sms2_no_AHT	no	0.340288	0.0703221	32	0.197046	0.483529	4.83899	3.17136e-05	9.51409e-05
lac_cer_total	Condition|within Infection	d_sms12_DKO - (g_sms2-M64R_no_AHT)	no	0.340656	0.0703221	32	0.197415	0.483897	4.84422	3.12356e-05	9.37069e-05
lac_cer_total	Condition|within Infection	d_sms12_DKO - h_sms12_WT	no	1.31576	0.0703221	32	1.17251	1.459	18.7104	8.54561e-19	2.56368e-18
lac_cer_total	Condition|within Infection	e_sms1_no_AHT - f_sms2_no_AHT	no	-0.0556607	0.0703221	32	-0.198902	0.0875807	-0.791511	0.434474	0.96225
lac_cer_total	Condition|within Infection	e_sms1_no_AHT - (g_sms2-M64R_no_AHT)	no	-0.0552923	0.0703221	32	-0.198534	0.087949	-0.786273	0.437492	0.997603
lac_cer_total	Condition|within Infection	e_sms1_no_AHT - h_sms12_WT	no	0.919807	0.0703221	32	0.776566	1.06305	13.0799	2.18991e-14	4.92729e-14
lac_cer_total	Condition|within Infection	f_sms2_no_AHT - (g_sms2-M64R_no_AHT)	no	0.000368321	0.0703221	32	-0.142873	0.14361	0.00523764	0.995854	0.995854
lac_cer_total	Condition|within Infection	f_sms2_no_AHT - h_sms12_WT	no	0.975468	0.0703221	32	0.832226	1.11871	13.8714	4.3934e-15	9.88514e-15
lac_cer_total	Condition|within Infection	(g_sms2-M64R_no_AHT) - h_sms12_WT	no	0.975099	0.0703221	32	0.831858	1.11834	13.8662	4.43938e-15	9.9886e-15

[truncated: 2 more sheets: Supp. 11, Supp. 12]
