# Supplementary material
Source: Research Square preprint supplement (doi:10.21203/rs.3.rs-9858454/v1)
Supplement: Supplementary file 1 [file fbfa45cc16da63ddc5fe641e.pdf]

## Supplementary information

### ***Chlamydia*-like bacterium *Simkania negevensis* exploits host sphingolipid salvage pathway and sphingomyelin synthesis during infection**

Arpita Mohanty<sup>1,†</sup>, Jonas D. Weinrich<sup>1,†</sup>, Fabian Schumacher<sup>2</sup>, Marcel Rühling<sup>1,‡</sup>, Sanisha Sunuwar<sup>1</sup>, Helena Szegedi<sup>1</sup>, Dominik Wigger<sup>2,§</sup>, Fabio Schmelz<sup>1</sup>, Bapin Kumar Panda<sup>3</sup>, Christian Kappe<sup>4</sup>, Daniela Brenner<sup>5</sup>, Melanie Schirmer<sup>6,7,8</sup>, Christoph Arenz<sup>4</sup>, Jürgen Seibel<sup>5</sup>, Joost C. M. Holthuis<sup>3</sup>, Sudip Das<sup>6,7,8</sup>, Martin Fraunholz<sup>1</sup>, Burkhard Kleuser<sup>2</sup>, and Vera Kozjak-Pavlovic<sup>1,\*</sup>

<sup>1</sup>*Department of Microbiology, Biocenter, Julius-Maximilians-Universität Würzburg, Würzburg, Germany.*

<sup>2</sup>*Institute of Pharmacy, Freie Universität Berlin, Berlin, Germany.*

<sup>3</sup>*Molecular Cell Biology Division, Department of Biology and Center of Cellular Nanoanalytics, Osnabrück University, Osnabrück, Germany*

<sup>4</sup>*Institute of Chemistry, Humboldt-Universität zu Berlin, Berlin, Germany.*

<sup>5</sup>*Institute of Organic Chemistry, Julius-Maximilians-University Würzburg, Würzburg, Germany.*

<sup>6</sup>*Translational Microbiome Data Integration, School of Life Sciences, Technical University of Munich, Freising, Germany*

<sup>7</sup>*Center for Organoid Systems, Technical University Munich, Garching, Germany.*

<sup>8</sup>*ZIEL—Institute for Food & Health, Technical University of Munich, Freising, Germany.*

<sup>†</sup>These authors contributed equally

<sup>‡</sup>Present address: MRC Laboratory of Molecular Biology, Francis Crick Avenue, Cambridge Biomedical Campus, Cambridge CB2 0QH, UK

<sup>§</sup> Present address: Department of Veterinary Medicines, Federal Office of Consumer Protection and Food Safety, Berlin, Germany.

\*Corresponding author: Vera Kozjak-Pavlovic; Biocenter, Am Hubland, D-97074 Würzburg, Germany; [vera.kozjak@uni-wuerzburg.de](mailto:vera.kozjak@uni-wuerzburg.de)

28 Table of Contents

| Contents                 | Page no. |
|--------------------------|----------|
| Supplementary methods    | 3        |
| Supplementary figures    | 6        |
| Supplementary tables     | 19       |
| Supplementary references | 21       |

29  
30  
31  
32  
33  
34  
35  
36  
37  
38  
39  
40  
41  
42  
43  
44  
45  
46  
47  
48  
49  
50  
51  
52  
53  
54  
55

## 56 **Supplementary Methods**

### 57 **1. Processing and Statistical Analysis of Targeted Sphingolipidomics Data**

#### 58 **a. Targeted lipidomics dataset**

59 Lipid abundances were reported as absolute molar amounts per sample, expressed as  
60 pmol/sample. Biological replicates were analysed for each experimental condition.

61 The targeted panel was interpreted as a defined analytical panel rather than as a complete  
62 representation of total cellular lipid or total cellular sphingolipid content. Therefore, all  
63 downstream analyses were designed to preserve the quantitative meaning of the measured  
64 absolute abundances and to avoid post hoc transformations that would convert the data into  
65 compositional fractions of the measured panel [1, 2].

#### 66 **b. Use of absolute pmol/sample values for statistical comparison**

67 Absolute pmol/sample values were retained as the main quantitative input for statistical  
68 testing. This approach was chosen because the experimental design already controlled the  
69 relevant denominator at the sample level. Specifically, samples were prepared from  
70 comparable biological input material, processed using the same extraction protocol, and  
71 analysed using the same targeted LC–MS/MS workflow. Internal standards added during  
72 extraction further supported control of extraction and ionisation-related technical variation [1].

73 When these conditions are satisfied, the measured pmol/sample value is directly  
74 interpretable as the amount of a given lipid species recovered from an equivalent sample.  
75 This makes the value suitable for comparing lipid abundance between experimental groups,  
76 provided that the biological input and sample-processing conditions are held constant.

77 No additional normalisation to the sum of measured lipids was applied before statistical  
78 testing. This was an intentional analytical decision, not an omission. Normalising each lipid  
79 to the total signal across the measured panel would change the biological meaning of the  
80 data from absolute abundance to within-panel composition. Such a transformation is not  
81 appropriate when the objective is to determine whether a lipid species or lipid class increases  
82 or decreases in absolute amount between conditions [1].

#### 83 **c. Rationale for not using alternative normalisation methods**

84 An alternative approach sometimes used in targeted lipidomics is to sum all measured lipid  
85 species within each sample and express each lipid as a fraction of this measured total:

$$86 \textit{lipid pmol/sample} \div \textit{sum of measured lipid pmol/sample}$$

87 This transformation was not used for inferential testing because the denominator has limited  
88 biological interpretability. The measured panel contains lipid species from multiple  
89 sphingolipid classes with distinct biochemical roles, subcellular localisations, turnover rates,  
90 and abundance ranges. Therefore, the summed value represents an LC–MS/MS panel-  
91 defined total, not total lipid, total sphingolipid, total membrane content, or any coherent  
92 biological pool.

93 The panel is also incomplete by design. It captures selected detectable lipid species rather  
94 than the full cellular lipidome. Consequently, the denominator reflects only the measured

95 species and should not be interpreted as total cellular sphingolipid, total ceramide, total  
96 sphingomyelin, or total lipid content.

97 In addition, this normalisation introduces compositional closure: all lipid values become  
98 mathematically dependent because they share the same within-sample denominator. A  
99 change in a high-abundance lipid class can make lower-abundance lipids appear relatively  
100 depleted even when their absolute pmol/sample values are unchanged, and vice versa [3].

101 Finally, cross-class row-sum normalisation can distort biologically relevant changes in low-  
102 abundance signalling lipids or pathway intermediates. If the denominator is dominated by  
103 abundant structural lipids, changes in lower-abundance species may be compressed or  
104 misrepresented. For these reasons, absolute pmol/sample values were retained for  
105 inferential analysis [1, 3].

#### 106 **d. Log<sub>10</sub> transformation before statistical testing**

107 Before inferential testing, absolute pmol/sample values were transformed using:

108  $\log_{10}(x + 1)$ ,

109 where x is the measured pmol/sample value for a given lipid in a given sample.

110 This transformation combines two distinct operations. The log<sub>10</sub> component changes the  
111 statistical scale of the positive abundance values, while the +1 offset allows zero-valued  
112 observations to remain mathematically defined. Importantly, this transformation does not  
113 normalise the data to total lipid, total sphingolipid, or any within-sample lipid sum. The  
114 biological denominator remains the original sample [1, 3].

115 The log<sub>10</sub> transformation was used because lipidomics abundance data are commonly right-  
116 skewed. A small number of high-abundance measurements can dominate group means,  
117 variances, and statistical tests on the raw scale. Log transformation compresses the upper  
118 range of the distribution and reduces scale-dependent variation, making the data more  
119 suitable for statistical comparison, particularly when sample sizes are modest [1, 3].

120 The +1 offset was included to handle zero-valued measurements. Since log<sub>10</sub>(0) is undefined,  
121 zero values would otherwise become infinite or unusable in downstream statistics [2, 4, 5].

122 Thus, the purpose of log<sub>10</sub>(x + 1) was to improve statistical behaviour while retaining the  
123 original absolute-abundance framework. It should not be interpreted as a compositional or  
124 total-lipid normalisation step [2, 4, 5].

#### 125 **e. Statistical comparison between experimental conditions**

126 Statistical testing was performed on the log<sub>10</sub>(x + 1)-transformed pmol/sample values. For  
127 each lipid species or lipid-class summary, comparisons were made between predefined  
128 experimental groups according to the experimental design. Where multiple pairwise  
129 comparisons were performed, p-values were adjusted for multiple testing using a false  
130 discovery rate (FDR) procedure [1].

131 Effect estimates from pairwise comparisons were used to summarise the direction and  
132 magnitude of differences between groups. A positive estimate indicates that the first group in

133 the contrast has a higher transformed abundance than the second group. A negative estimate  
134 indicates that the first group has a lower transformed abundance than the second group.

135 Non-significant pairwise comparisons after FDR correction were not interpreted as confirmed  
136 biological changes, even if a numerical estimate was present. In visual summaries, these  
137 comparisons may be masked in grey or labelled as non-significant.

138

Supplementary Figure 1

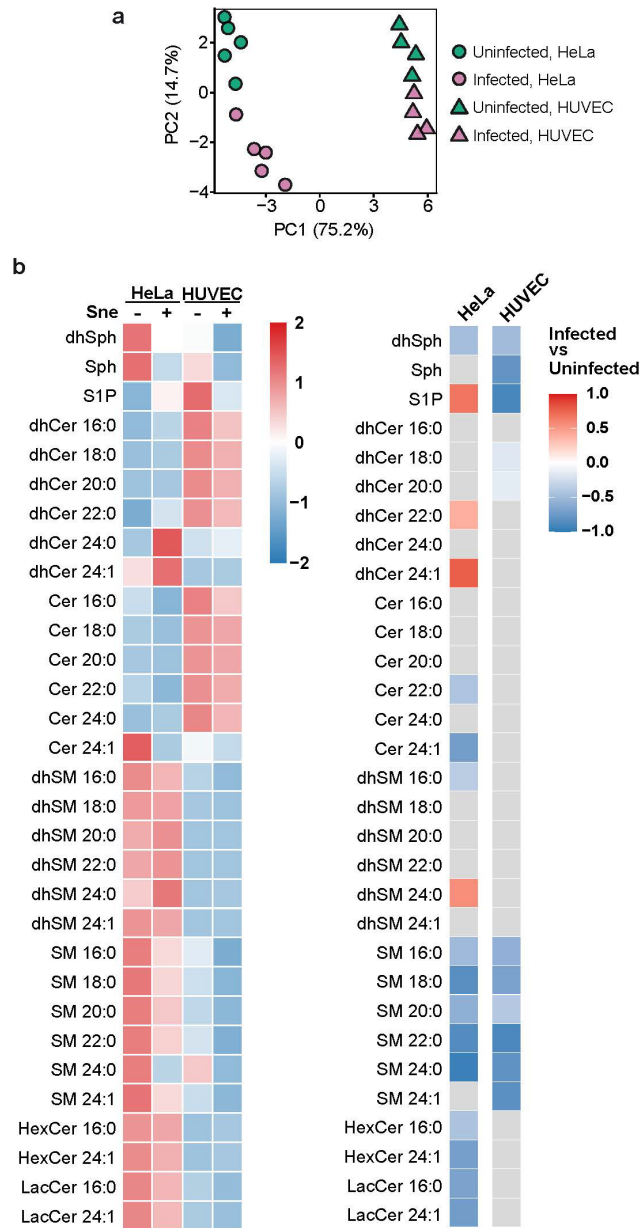

140

141

142

143

144

145

146

147

148

149

150

151

152

153

**Supp. Fig. 1. Species-level sphingolipid remodeling in HeLa and HUVEC cells during Sne infection.** HeLa and HUVEC cells were infected with Sne for 3 or 2 days, respectively, at MOI 1. Lipids were extracted with methanol and analyzed by LC-MS/MS. Lipid abundances were quantified as pmol/sample. For statistical testing, values were transformed as  $\log_{10}(x + 1)$ . **(a)** Principal component analysis (PCA) of individual sphingolipid species abundances  $\log_{10}(x + 1)$ -transformed pmol/sample in uninfected (green) and infected (purple) HeLa ( $n = 5$ ) and HUVEC cells ( $n = 4$ ). PCA was performed on mean-centered and unit-variance-scaled data. Samples segregate primarily by cell type along PC1 (75.2 %) and by infection status along PC2 (14.7 %). Symbols denote cell type (circles, HeLa; triangles, HUVEC) and colors denote infection status (green, uninfected; magenta, infected). **(b)** Heatmaps show row-wise z-scores calculated on  $\log_{10}(x + 1)$ -transformed pmol/sample values (left panel) in uninfected (Sne -) and infected (Sne +) HeLa ( $n = 5$ ) and HUVEC cells ( $n = 4$ ). Heatmap showing pairwise group comparisons performed on  $\log_{10}(x + 1)$ -transformed pmol/sample values between the indicated experimental conditions (right panel), represented as  $\log_2$  values (infected - uninfected) with  $p$ -value adjusted for False-Discovery Rate (FDR). Values are displayed ranging from blue (decrease) to red (increase), with white indicating no change. Non-significant comparisons ( $FDR \geq 0.05$ ) are masked (grey).

Supplementary Figure 2

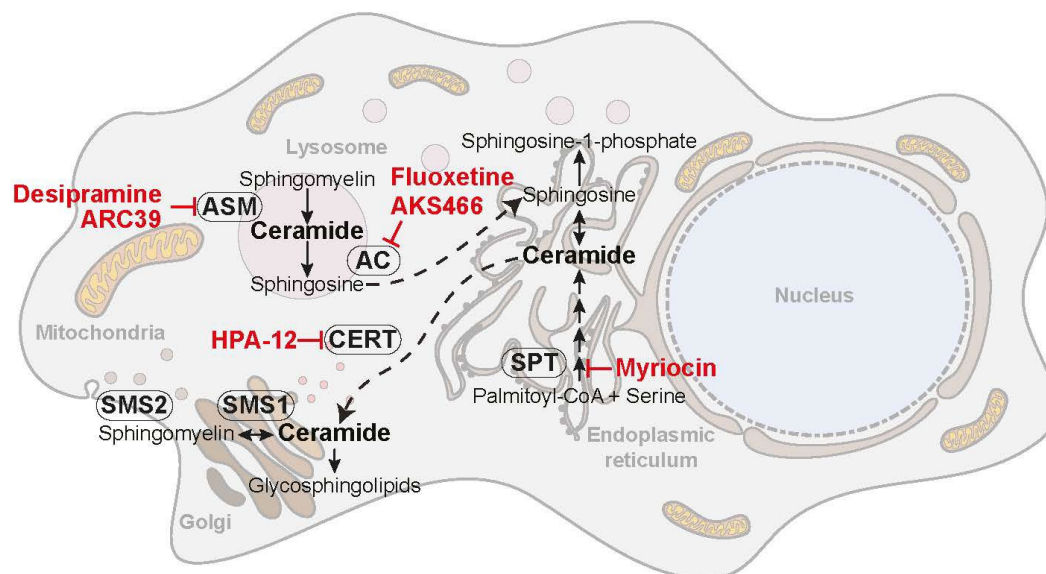

154

155 **Supp. Fig. 2. Overview of sphingolipid metabolic pathways and experimental perturbations.** Schematic overview  
 156 of host sphingolipid metabolic pathways targeted in this study and corresponding pharmacological and genetic  
 157 perturbations used to investigate *S. negevensis* infection. Myriocin blocks *de novo* ceramide synthesis through serine  
 158 palmitoyltransferase (SPT) inhibition. ARC39 and desipramine inhibit acid sphingomyelinase (ASM)-dependent  
 159 sphingomyelin hydrolysis, whereas AKS466 and fluoxetine target acid ceramidase (AC)-associated ceramide  
 160 catabolism. HPA-12 inhibits CERT-mediated non-vesicular ceramide trafficking from the endoplasmic reticulum to the  
 161 Golgi apparatus. The contribution of sphingomyelin synthase activity was assessed using SMS1/2 double knockout  
 162 (dko) cells carrying inducible complementation constructs or catalytically impaired SMS2 mutants.

163

Supplementary Figure 3

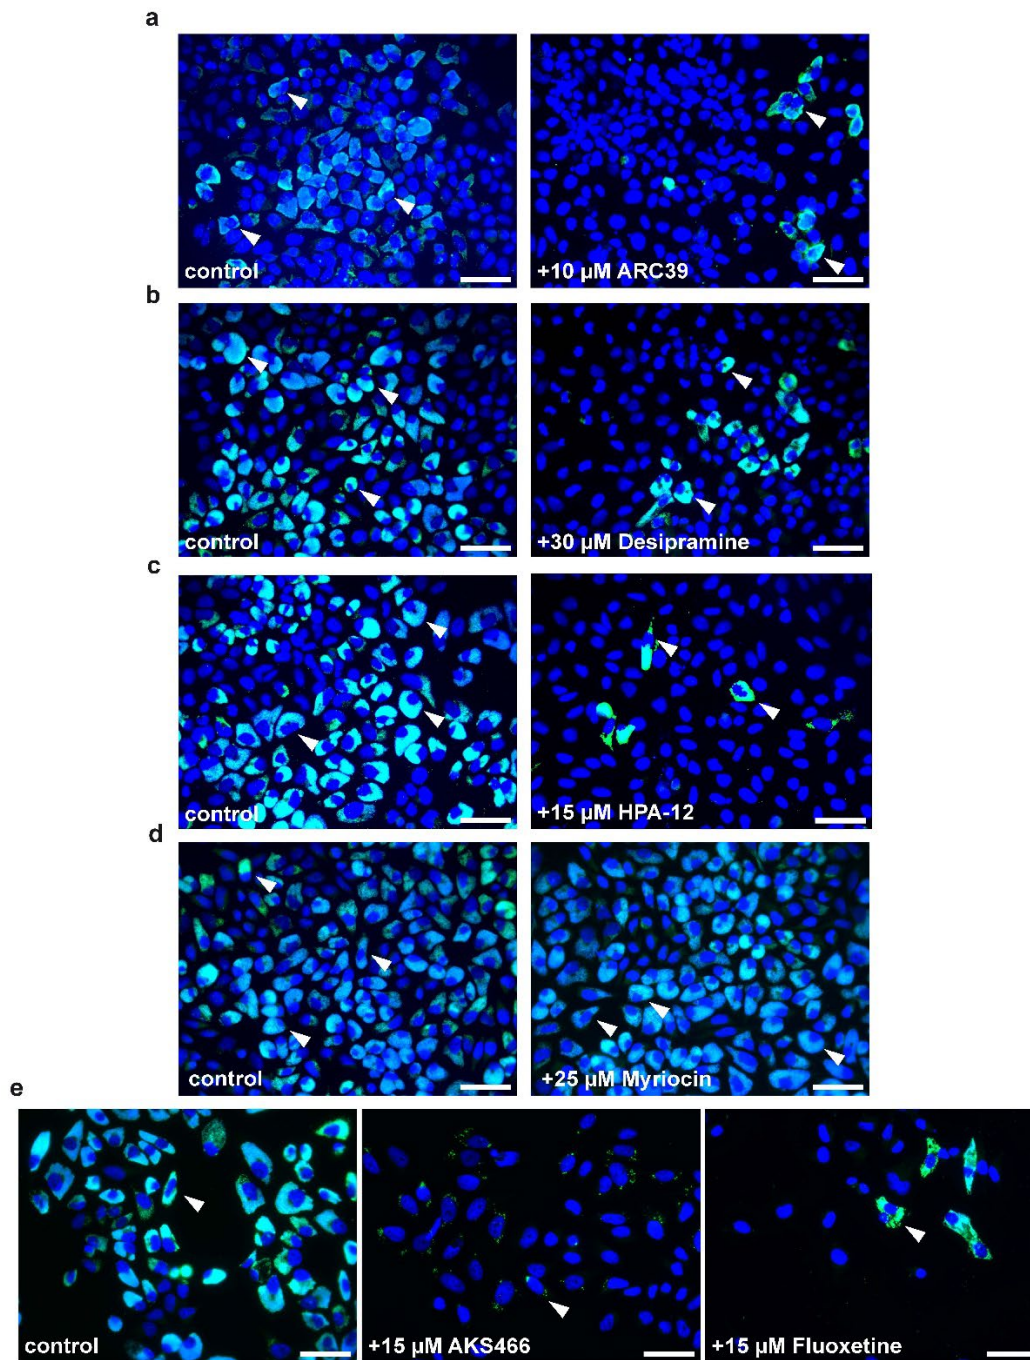

164

165 **Supp. Fig. 3. Inhibition of sphingolipid pathways alters Sne infection and vacuole morphology.** Representative  
166 fluorescence microscopy images of HeLa cells following inhibition of sphingolipid metabolism pathways. Cells were  
167 pre-treated with the indicated inhibitors for 3 h and were infected with Sne (MOI = 1) for 72 h in the presence of  
168 inhibitors. Cells were fixed and stained with DAPI (blue) and an anti-*S. negevensis* (Sn) GroEL (green). Representative  
169 infected cells were indicated by white arrowheads. Solvent-treated cells were used as controls. Scale bar, 50  $\mu\text{m}$ . (a)  
170 Direct inhibition of ASM using ARC39 (10  $\mu\text{M}$ ). (b) Indirect ASM inhibition using desipramine (30  $\mu\text{M}$ ). (c) Inhibition of  
171 ceramide transport via CERT using HPA-12 (15  $\mu\text{M}$ ). (d) Inhibition of *de novo* ceramide synthesis using myriocin (25  
172  $\mu\text{M}$ ) (e) Inhibition of acid ceramidase (AC) using AKS466 (15  $\mu\text{M}$ ) or fluoxetine (15  $\mu\text{M}$ ).

Supplementary Figure 4

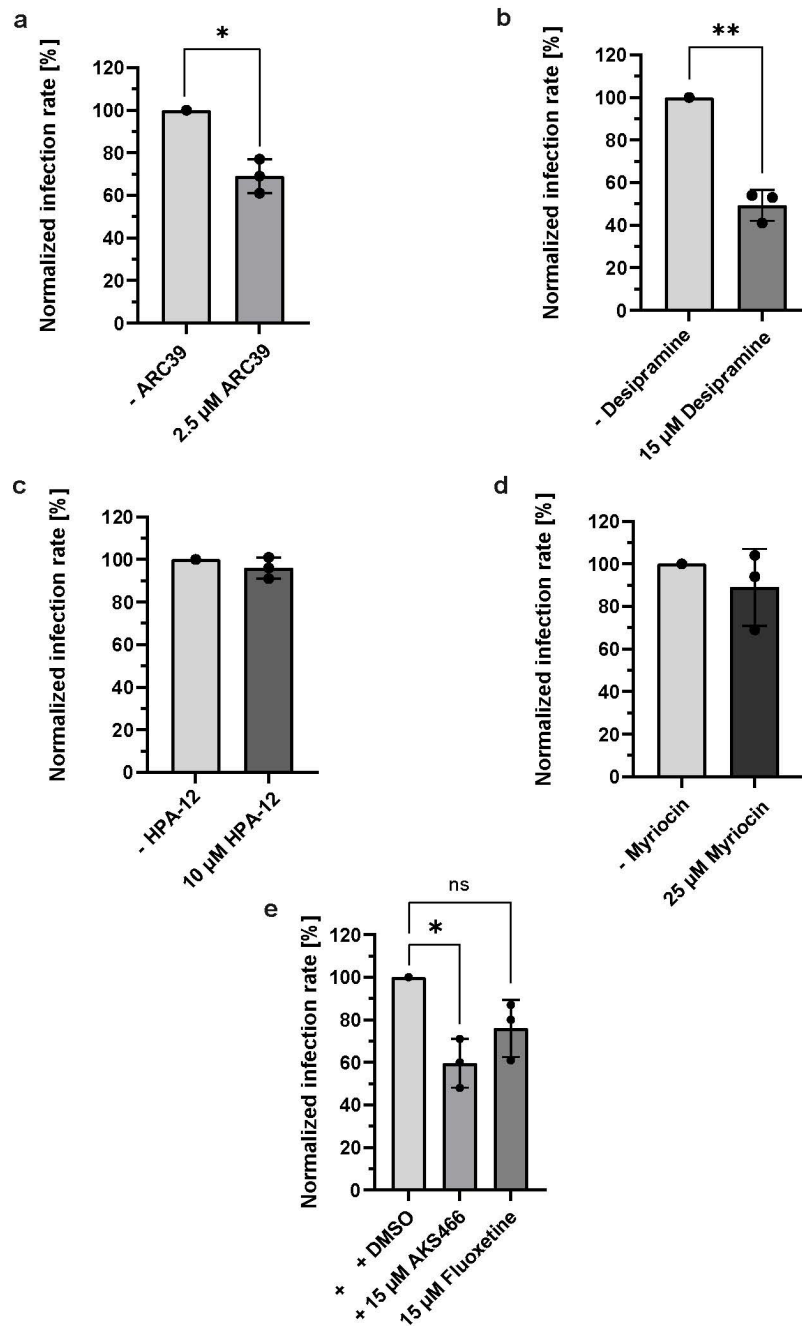

173

174

175 **Supp. Fig. 4. Late-stage inhibition of sphingolipid metabolism has a limited effect on Sne infection.** Infection  
 176 rates in HeLa cells when infected with Sne (MOI = 1) following treatment with the indicated inhibitors 6 h p.i. **(a)** Direct  
 177 inhibition of ASM using ARC39 (2.5 μM). **(b)** Indirect ASM inhibition using desipramine (15 μM). **(c)** Inhibition of  
 178 ceramide transport via CERT using HPA-12 (10 μM). **(d)** Inhibition of *de novo* ceramide synthesis using myriocin (25  
 179 μM). **(e)** Inhibition of acid ceramidase (AC) using AKS466 (15 μM) or fluoxetine (15 μM). Infection rates were averaged  
 180 per well, normalized to the respective solvent control. Bars depict mean ± SD. n = 3. Statistical analysis was performed  
 181 using one-sample t-test and Wilcoxon test (\*p ≤ 0.05, \*\*p ≤ 0.01, \*\*\*p ≤ 0.001).

Supplementary Figure 5

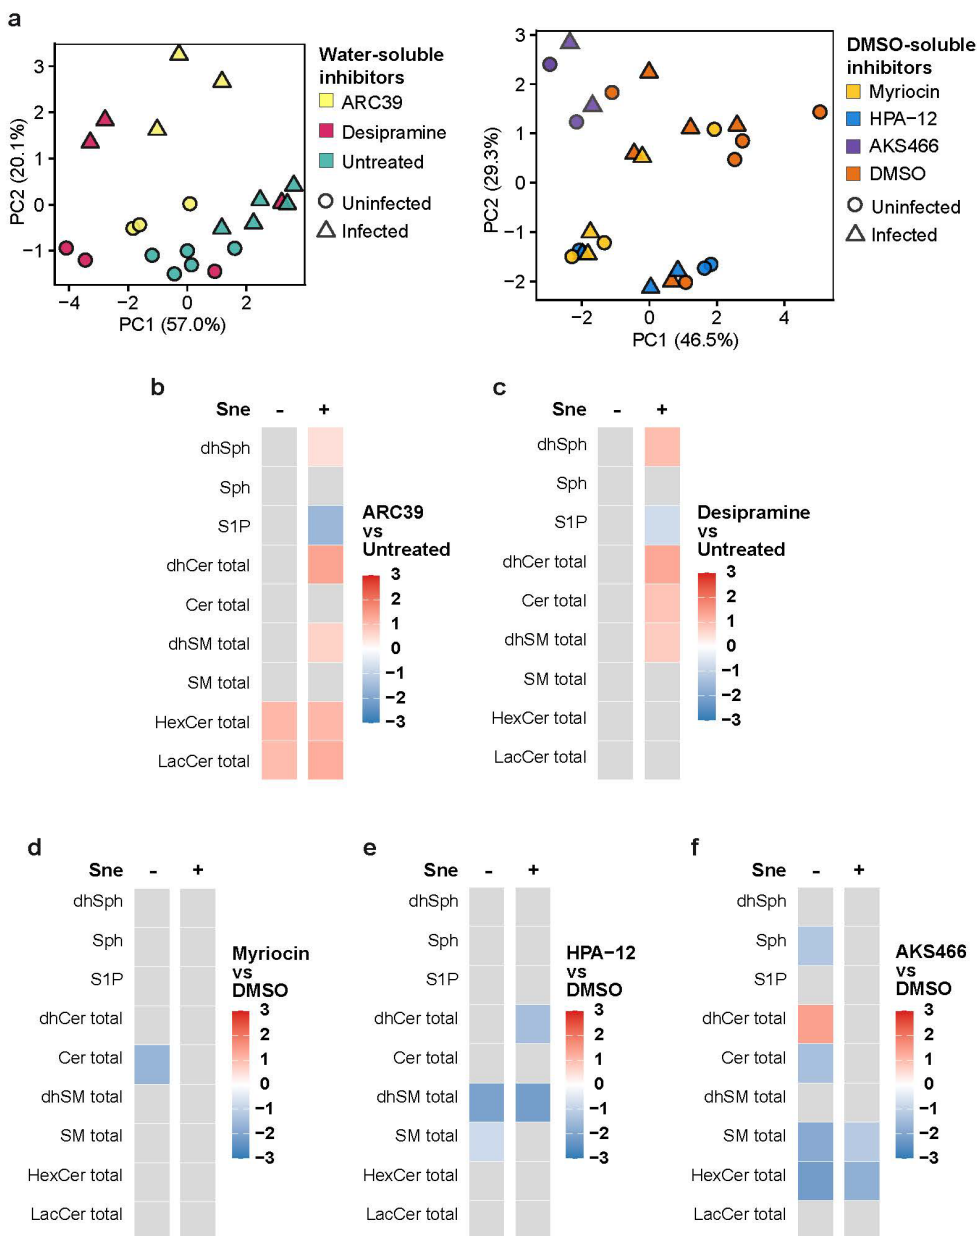

182

183 **Supp. Fig. 5. Spingolipid remodeling during pharmacological pathway inhibition.** HeLa cells treated with  
 184 sphingolipid pathway inhibitors were either left uninfected or infected with Sne (MOI = 1). Lipids were extracted with  
 185 methanol and analyzed by LC-MS/MS. Lipid abundances were quantified as pmol/sample. For statistical testing, values  
 186 were transformed as  $\log_{10}(x + 1)$ . (a) PCA of sphingolipid abundances from uninfected HeLa cells,  $\log_{10}(x + 1)$ -transformed  
 187 pmol/sample, was performed on mean-centered and unit-variance-scaled data. The left panel shows lipidome from cells  
 188 treated with water-soluble ASM inhibitors: ARC39 (yellow) and desipramine (red) or left untreated (teal). The separation  
 189 along PC1 (57.0 %) and PC2 (20.1 %) reflects inhibitor-associated variance. The right panel shows the sphingolipid profile  
 190 of cells treated with DMSO-soluble inhibitors: AKS466 (purple), HPA-12 (blue), myriocin (yellow), and control (orange,  
 191 DMSO). The separation along PC1 (46.5 %) and PC2 (29.3 %) reflects inhibitor-dependent remodeling of the sphingolipid  
 192 profile. Circles represent individual biological replicates, and colors indicate treatment. (b–f) Heatmaps showing pairwise  
 193 group comparisons performed on  $\log_{10}(x + 1)$ -transformed pmol/sample values between uninfected and infected conditions,  
 194 following pharmacological inhibition. Values were represented as  $\log_2$  relative to untreated or vehicle controls (ARC39 vs  
 195 untreated; desipramine vs untreated; HPA-12 vs DMSO; myriocin vs DMSO; AKS466 vs DMSO), with p values adjusted  
 196 for FDR. Rows represented sphingolipid classes and columns represented infection status. Red and blue indicate relative  
 197 increase or decrease in sphingolipid species; non-significant comparisons ( $FDR \geq 0.05$ ) masked (grey).

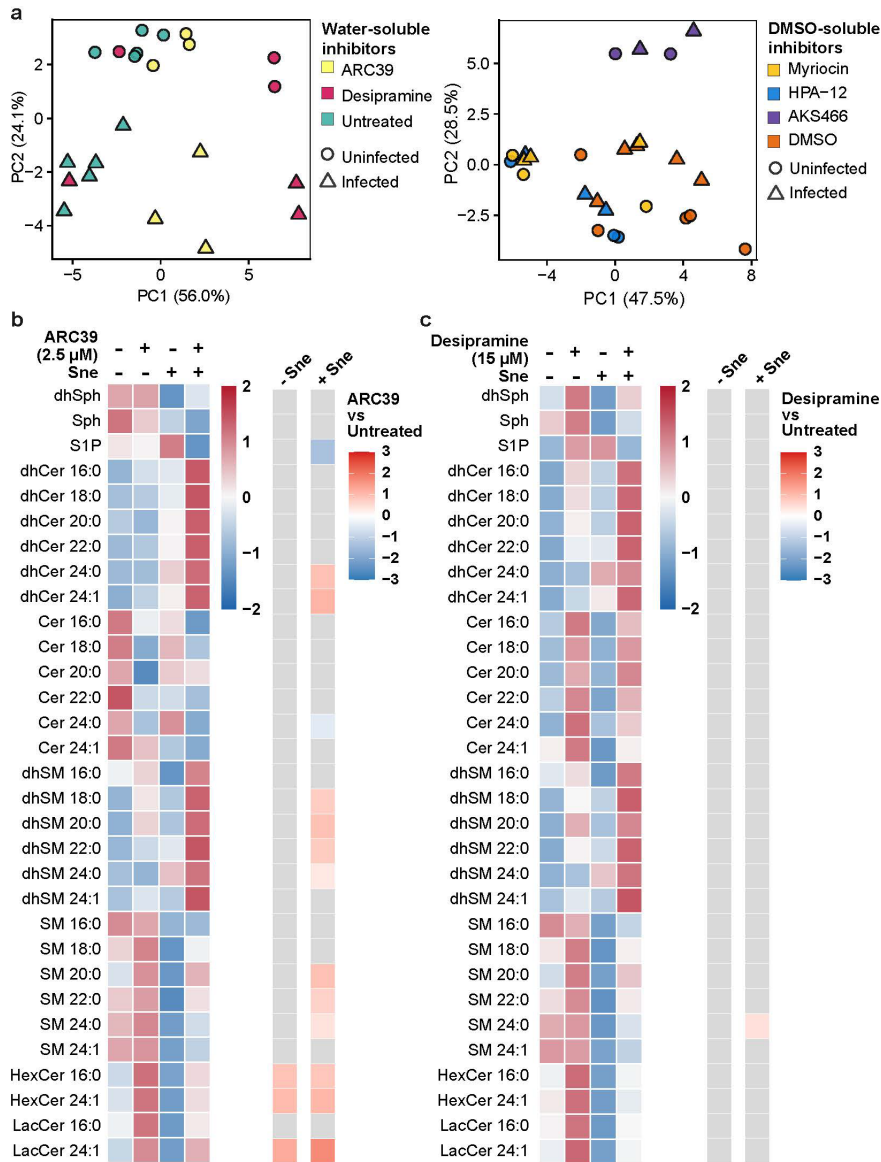

198

199 **Supp. Fig. 6. Species-level sphingolipid remodeling under ASM inhibition.** Lipids were extracted with methanol  
 200 and analyzed by LC-MS/MS. Lipid abundances were quantified as pmol/sample. For statistical testing, values were  
 201 transformed as  $\log_{10}(x + 1)$ . Principal component analysis (PCA) of individual sphingolipid species abundances  $\log_{10}(x$   
 202  $+ 1)$ -transformed pmol/sample from uninfected (circles) and infected (triangles) HeLa cells was performed on mean-  
 203 centered and unit-variance-scaled data. **(a)** Lipidome from cells treated with water-soluble ASM inhibitors; (left panel)  
 204 ARC39 (yellow) and desipramine (red) or left untreated (teal) shows separation primarily along PC1 (56.0 %) and PC2  
 205 (24.1 %), reflecting inhibitor-associated variance. along PC1 (47.5 %) and PC2 (28.5 %), indicating inhibitor-dependent  
 206 remodeling of the sphingolipid profile. Sphingolipid profile of cells treated with DMSO-soluble inhibitors; (right panel)  
 207 AKS466 (purple), HPA-12 (blue), myriocin (yellow), and control (orange, DMSO), shows separation along PC1 (47.5  
 208 %) and PC2 (28.5 %), indicating inhibitor-dependent remodeling of the sphingolipid profile. Circles represent individual  
 209 biological replicates, and colors indicate treatment. **(b, c)** Heatmap showing row-wise z-scores calculated on  $\log_{10}(x +$   
 210  $+ 1)$ -transformed pmol/sample values of individual sphingolipid species, following ARC39 (b) or desipramine (c) inhibition  
 211 under uninfected (Sne -) and infected (Sne +) conditions (left panel). Heatmap of pairwise group comparisons  
 212 performed on  $\log_{10}(x + 1)$ -transformed pmol/sample values (right panel) represented as  $\log_2$  (infected vs uninfected)  
 213 with p-value adjusted for False-Discovery Rate (FDR). Values are displayed ranging from blue (decrease) to red  
 214 (increase), with white indicating no change and non-significant comparisons (FDR  $\geq 0.05$ ) masked (grey).

Supplementary Figure 7

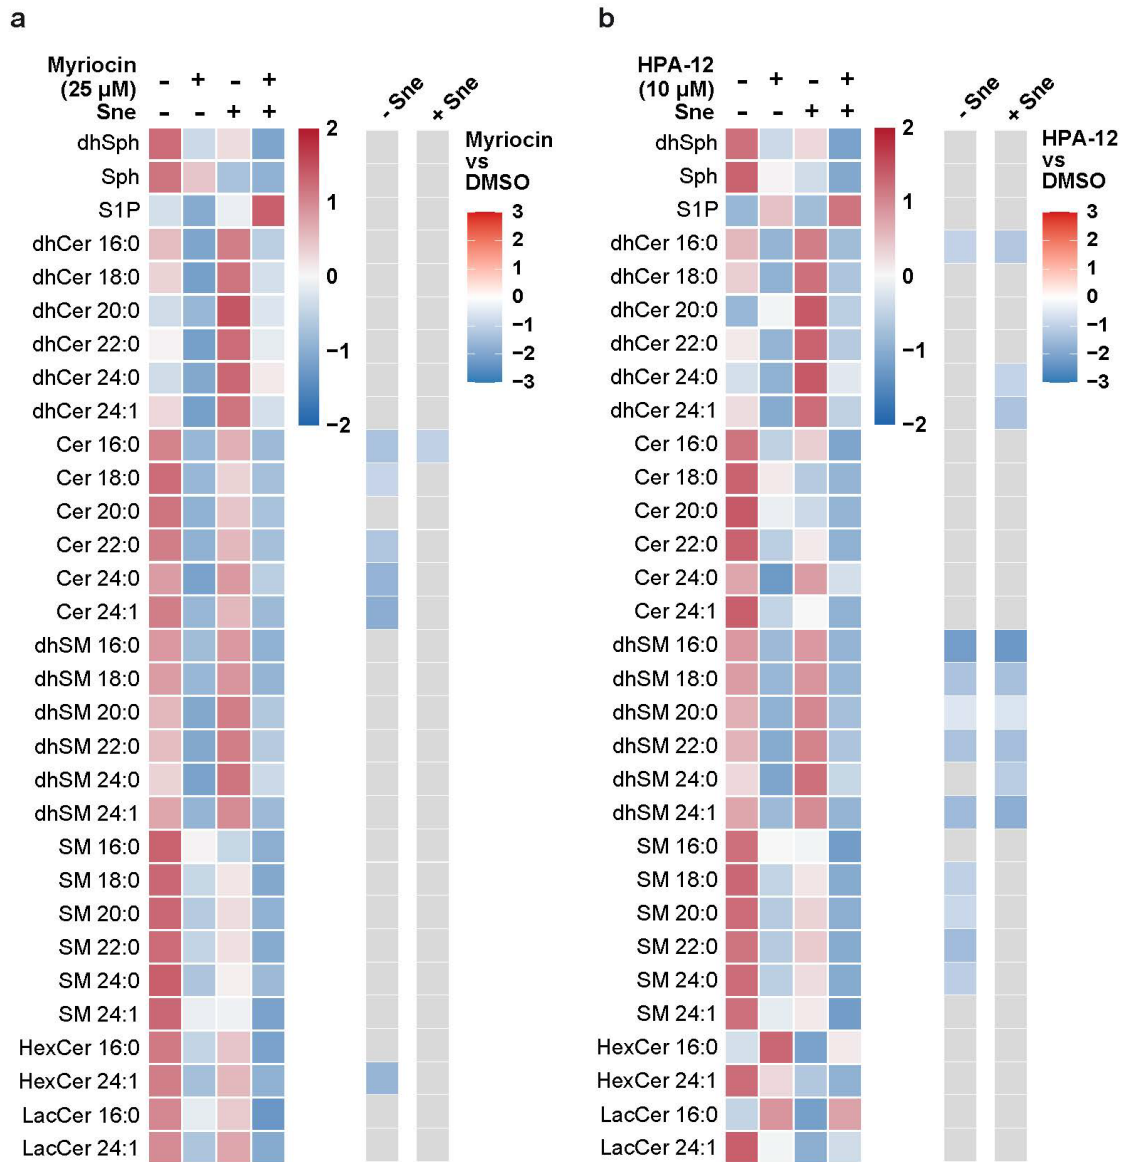

215

216 **Supp. Fig. 7. Species-level sphingolipid remodeling under myriocin and HPA-12 treatment.** Lipids were extracted  
 217 with methanol and analyzed by LC-MS/MS. Lipid abundances were quantified as pmol/sample. For statistical testing,  
 218 values were transformed as  $\log_{10}(x + 1)$ . **(a, b)** Heatmap showing row-wise z-scores calculated on  $\log_{10}(x + 1)$ -  
 219 transformed pmol/sample values of individual sphingolipid species following myriocin (a) or HPA-12 (b) inhibition under  
 220 uninfected (Sne -) and infected (Sne +) conditions (left panel). Right panels depict heatmaps of pairwise group  
 221 comparisons performed on  $\log_{10}(x + 1)$ -transformed pmol/sample values represented as  $\log_2$  (infected vs. uninfected )  
 222 with p-value adjusted for False-Discovery Rate (FDR). Values are displayed ranging from blue (decrease) to red  
 223 (increase), with white indicating no change, and non-significant comparisons (FDR  $\geq 0.05$ ) masked (grey).

Supplementary Figure 8

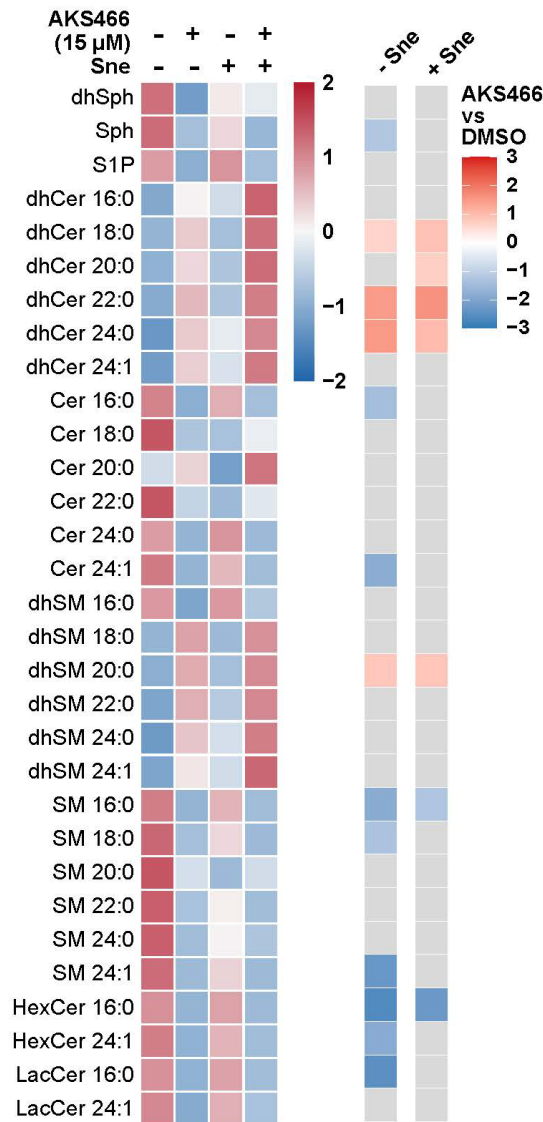

224

225 **Supp. Fig. 8. Species-level sphingolipid remodeling under AKS466 treatment.** Lipids were extracted with  
 226 methanol and analyzed by LC-MS/MS. Lipid abundances were quantified as pmol/sample. For statistical testing, values  
 227 were transformed as  $\log_{10}(x + 1)$ . Heatmap showing row-wise z-scores calculated on  $\log_{10}(x + 1)$ -transformed  
 228 pmol/sample values of individual sphingolipid species following AKS466 inhibition under uninfected (Sne -) and infected  
 229 (Sne +) conditions (left panel). Heatmap of pairwise group comparisons performed on  $\log_{10}(x + 1)$ -transformed  
 230 pmol/sample values (right panel) represented as  $\log_2$  (infected vs. uninfected) with p-value adjusted for False-  
 231 Discovery Rate (FDR). Values are displayed ranging from blue (decrease) to red (increase), with white indicating no  
 232 change, and non-significant comparisons (FDR  $\geq 0.05$ ) masked (grey).

Supplementary Figure 9

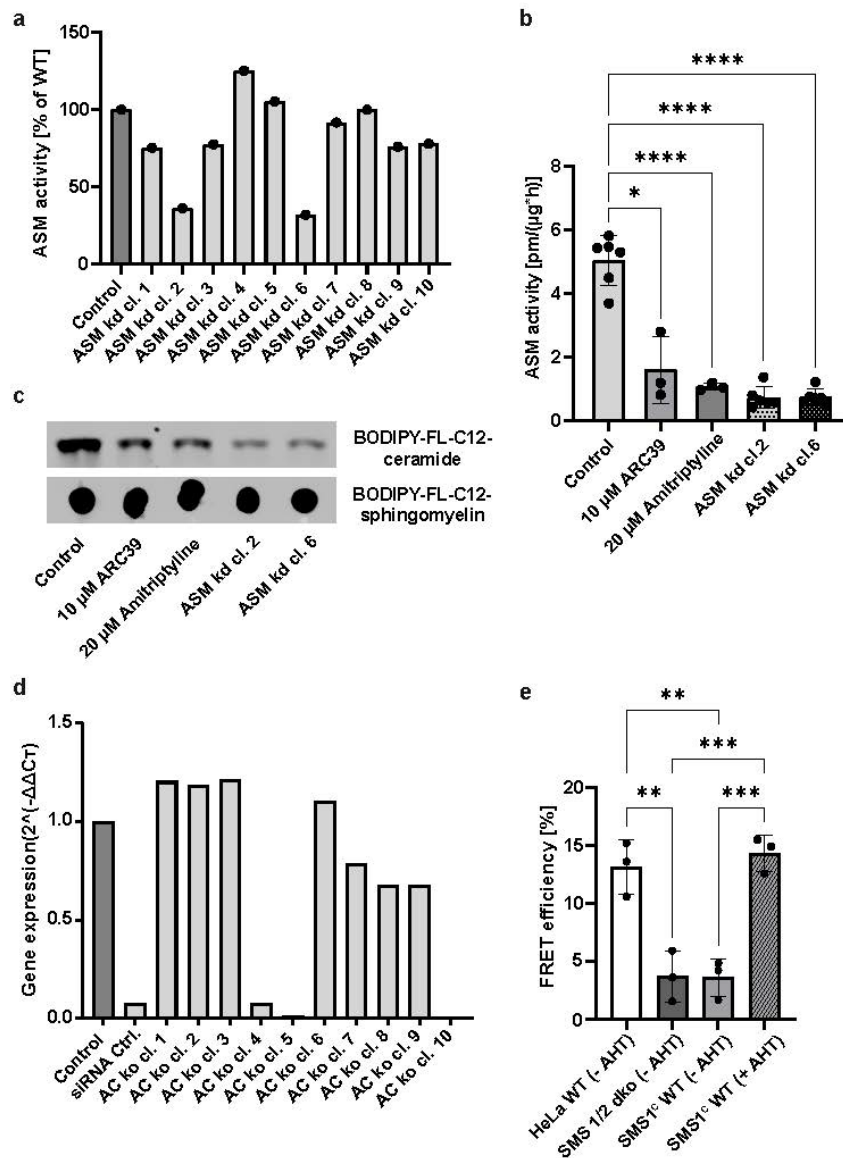

233

234 **Supp. Fig. 9. Validation of genetically modified sphingolipid metabolism cell lines.** (a) Screening of clones with  
 235 the shRNA-mediated knockdown of acid sphingomyelinase (ASM kd). ASM activity was measured and normalized to  
 236 the HeLa WT control. (b) ASM activity was quantified in inhibitor-treated (ARC39 10 µM; amitriptyline, 20 µM) cells and  
 237 ASM kd clones compared with control cells. The graphs show mean value ± SD, (n = 3). Statistical significance was  
 238 determined using one-way ANOVA followed by multiple comparisons. \*p ≤ 0.05; \*\*\*\*p ≤ 0.0001. (c) Representative  
 239 thin-layer chromatography (TLC) analysis using BODIPY-FL-C12-labelled ceramide. Reduced conversion to  
 240 sphingomyelin was observed upon ASM inhibition (ARC39, 10 µM; amitriptyline, 20 µM) and in ASM kd clones (cl.2  
 241 and cl.6), confirming the knockdown. (d) Validation of AC ko clones by gene expression analysis. Relative expression  
 242 levels ( $2^{-\Delta\Delta CT}$ ) confirmed efficient depletion of AC expression in selected knockout clones compared with control  
 243 and *ASAH1*-siRNA-kd control. (e) Validation of sphingomyelin synthase 1 (SMS1) activity using a FRET-based assay.  
 244 HeLa WT, SMS1/2 dko, and SMS1 WT complemented cells (SMS1<sup>1c</sup> WT) were analysed in the absence or presence  
 245 of AHT induction. FRET efficiency was determined by FRET acceptor bleaching. Bar graphs show mean ± SD, (n = 3).  
 246 Statistical significance was assessed using One-way ANOVA followed by Šídák's multiple comparison. \*p < 0.05;  
 247 \*\*p < 0.01; \*\*\*p < 0.001; ns, not significant.

Supplementary Figure 10

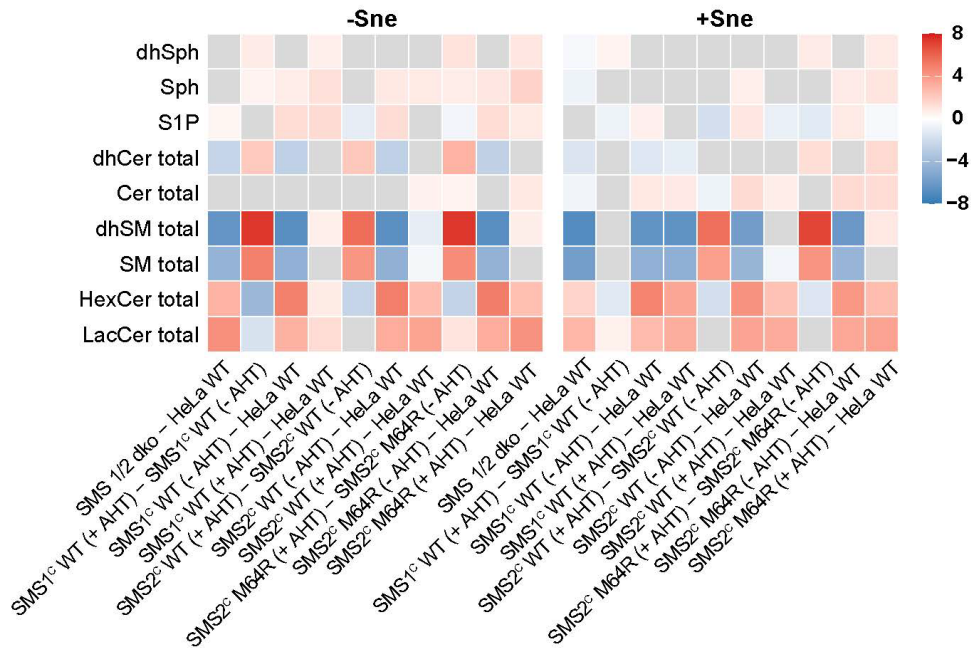

248

249 **Supp. Fig. 10. Differential sphingolipid class remodeling across SMS genotypes.** Lipids were extracted with  
 250 methanol and analyzed by LC-MS/MS. Lipid abundances were quantified as pmol/sample. For statistical testing, values  
 251 were transformed as  $\log_{10}(x + 1)$ . Heatmap showing pairwise group comparisons performed on  $\log_{10}(x + 1)$ -transformed  
 252 pmol/sample values across SMS-modified cell lines represented as  $\log_2$  (uninfected, -Sne and infected +Sne) with p-  
 253 value adjusted for FDR. Pairwise comparisons were performed between SMS1/2 dko, SMS1<sup>c</sup> WT, SMS2<sup>c</sup> WT, and  
 254 SMS2<sup>c</sup> M64R cells relative to HeLa WT controls and under both AHT-induced (+AHT) and non-induced (-AHT)  
 255 conditions. Values are displayed ranging from blue (decrease) to red (increase), with white indicating no change, and  
 256 non-significant comparisons (FDR  $\geq$  0.05) masked (grey).

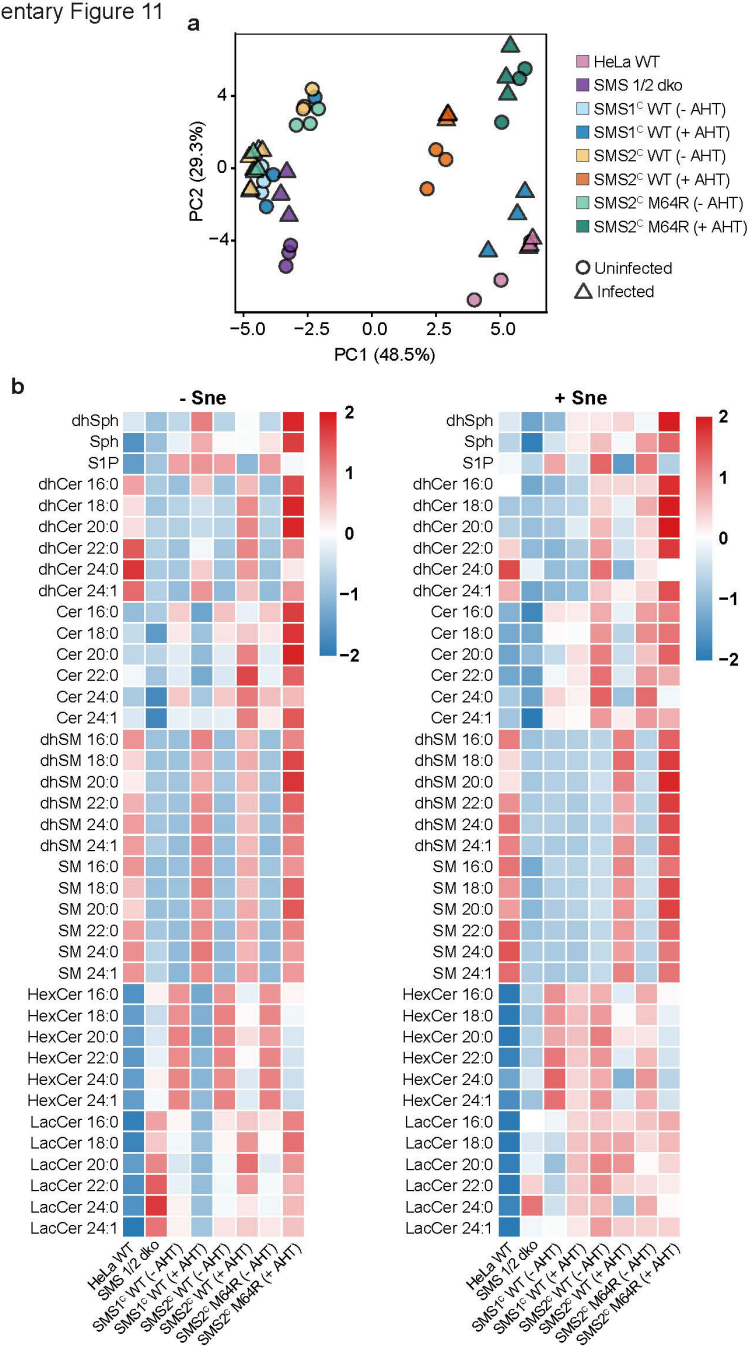

257

258 **Supp. Fig. 11. SMS genotype-dependent remodeling of individual sphingolipid species.** Lipids were extracted  
 259 with methanol and analyzed by LC-MS/MS. Lipid abundances were quantified as pmol/sample. For statistical testing,  
 260 values were transformed as  $\log_{10}(x + 1)$ . **(a)** PCA analysis of individual sphingolipid abundances was performed on  
 261  $\log_{10}(x + 1)$ -transformed pmol/sample values across SMS1/2 genotypes (HeLa WT, SMS1/2 dko, SMS1<sup>C</sup> WT (-/+AHT),  
 262 SMS2<sup>C</sup> WT (-/+AHT), and SMS2<sup>C</sup> M64R (-/+AHT), in uninfected (circle) and infected (triangle) conditions (n = 3).  
 263 Samples segregated along PC1 (48.5 %) and PC2 (29.3 %), reflecting differences associated with SMS genotype,  
 264 AHT-dependent induction, and infection status. Colors denote SMS genotype and shapes indicate infection status. **(b)**  
 265 Heatmap showing row-wise z-scores calculated on  $\log_{10}(x + 1)$ -transformed pmol/sample values across different cell  
 266 lines under uninfected (-Sne) and infected (+Sne) conditions, ranging from low (blue) to high (red).

Supplementary Figure 12

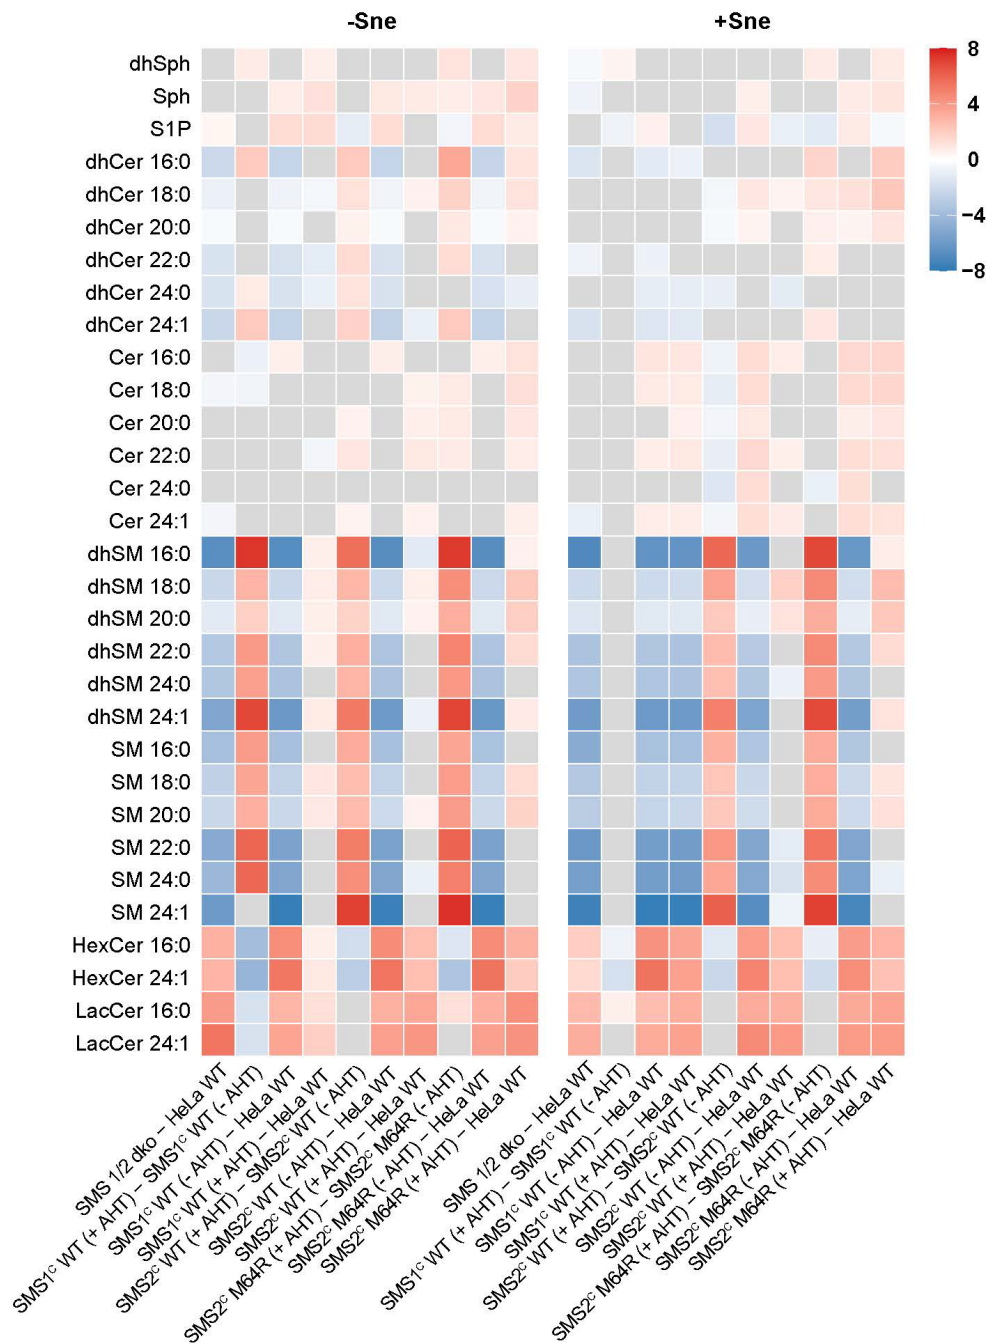

267

268 **Supp. Fig. 12. Differential remodeling of individual sphingolipid species across SMS genotypes.** Heatmap  
 269 showing pairwise group comparisons performed on  $\log_{10}(x + 1)$ -transformed pmol/sample values of individual  
 270 sphingolipids across SMS-modified cell lines, represented as  $\log_2$  (uninfected (-Sne) and infected (+Sne)) with p-value  
 271 adjusted for FDR. Pairwise comparisons were performed between SMS1/2 dko, SMS1<sup>c</sup> WT, SMS2<sup>c</sup> WT, and SMS2<sup>c</sup>  
 272 M64R cells relative to HeLa WT controls and under both AHT-induced (+AHT) and non-induced (-AHT) conditions.  
 273 Values are displayed ranging from blue (decrease) to red (increase), with white indicating no change, and non-  
 274 significant comparisons ( $FDR \geq 0.05$ ) masked (grey).

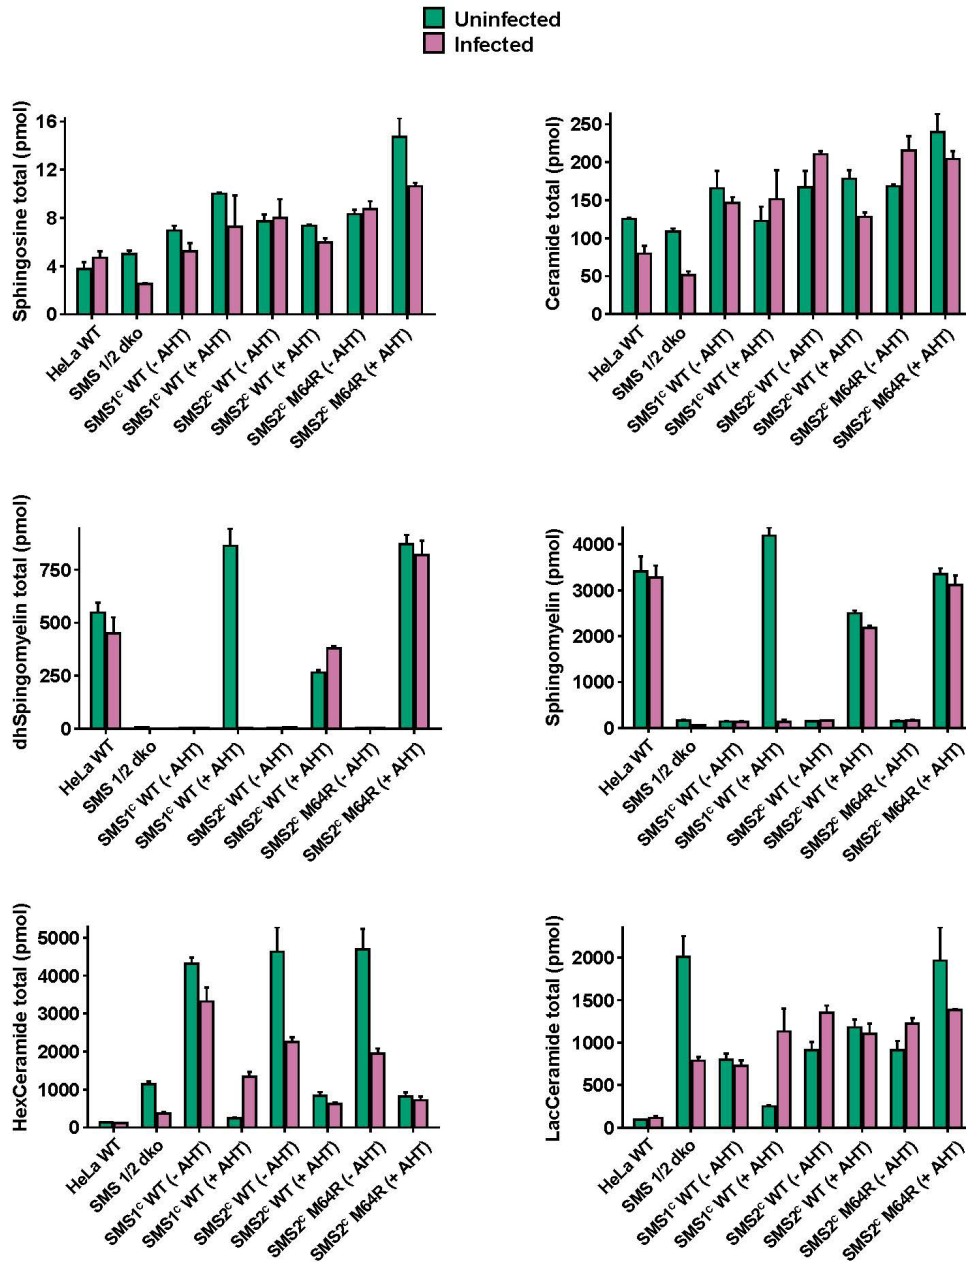

275

276 **Supp. Fig. 13. Quantitative sphingolipid class abundances across SMS genotypes during *Sne* infection.**

277 Quantification of sphingolipids (sphingosine, ceramide, dihydrosphingomyelin, sphingomyelin, hexosylceramide, and  
 278 lactosylceramide) abundances in SMS-modified HeLa cells under uninfected (green) and infected (purple) conditions.  
 279 Infection-dependent changes were compared across following genotypes: HeLa WT, SMS1/2 dko, SMS1<sup>C</sup> WT (-  
 280 /+AHT), SMS2<sup>C</sup> WT (-/+AHT), and SMS2<sup>C</sup> M64R (-/+AHT). Lipid abundances were quantified by targeted LC-MS/MS  
 281 based lipidomics and expressed as pmol/sample. Bar plots represent total levels of sphingolipid classes (mean ± SD),  
 282 with colors indicating infection.

**Supplementary Table:1 Cell lines used**

| Nr. | Cell lines                                     | Description                                              | Genetic modification                                     | Method of generation                            | Credits/source                                                             |
|-----|------------------------------------------------|----------------------------------------------------------|----------------------------------------------------------|-------------------------------------------------|----------------------------------------------------------------------------|
| 1.  | HeLa (ATCC CCL-2™) and HeLa229 (ATCC CCL-2.1™) | Used as control for infection and lipidomics experiments | None                                                     | Standard cell culture                           | Lab stock                                                                  |
| 2.  | HUVEC, Gibco™, Cat. No.C01510C)                | Used as a model for comparison with HeLa cells           | None                                                     | Standard cell culture                           | Lab stock                                                                  |
| 3.  | ASM KD (cl.2, cl.6)                            | HeLa cells with reduced acid sphingomyelinase activity   | Knockdown of ASM (SMPD1)                                 | Stable shRNA-mediated knockdown                 | Generated by Kerstin Paprotka and validated by Marcel Rühling.             |
| 4.  | AC KO (cl.5)                                   | HeLa cells lacking acid ceramidase activity              | Knockout of AC (ASAH1)                                   | CRISPR/Cas9-mediated gene deletion              | Generated in this study.                                                   |
| 5.  | CERT KO                                        | HeLa cells deficient in ceramide transport               | Knockout of CERT (COL4A3BP)                              | CRISPR/Cas9-mediated gene deletion              | Provided by Dagmar Heuer.                                                  |
| 6.  | SMS1/2 DKO                                     | HeLa cells lacking SMS1&2 activity                       | Knockout of SMS1 (SGMS1) and SMS2 (SGMS2)                | CRISPR/Cas9-mediated gene deletion              | Provided by Joost Holthuis                                                 |
| 7.  | SMS1-complemented DKO                          | SMS1/2 DKO cells with restored SMS1 expression           | Re-expression of SMS1 in DKO background                  | Lentiviral transduction of pInducer20-FLAG-SMS1 | Generated in this study. Plasmid construct was provided by Joost Holthuis. |
| 8.  | SMS2 - complemented DKO                        | SMS1/2 DKO cells expressing SMS2                         | Re-expression of SMS2 in DKO background                  | Lentiviral transduction of pInducer20-FLAG-SMS2 | Provided by Joost Holthuis.                                                |
| 9.  | SMS2-M64A-complemented DKO                     | SMS1/2 DKO cells expressing SMS2 mutant                  | M64A mutation (catalytically active variant)             | Lentiviral transduction                         | Provided by Joost Holthuis.                                                |
| 10. | SMS2-M64R-complemented DKO                     | SMS1/2 DKO cells expressing ER-mislocalized SMS2         | M64R mutation (catalytically active but ER-mislocalized) | Lentiviral transduction                         | Provided by Joost Holthuis.                                                |
| 11. | U-2 OS                                         | Used to prepare the Simkania stocks                      | None                                                     | Standard cell culture                           | Lab stock                                                                  |

288

289

290

## Supplementary Table:2 LC-MS/MS parameters for sphingolipid quantification.

291

| Sphingolipid                    | Precursor ion (m/z)                       | Product ion (m/z) <sup>a</sup> | ISTD                     | Calibration reference compound |
|---------------------------------|-------------------------------------------|--------------------------------|--------------------------|--------------------------------|
| d <sub>7</sub> -Sph (ISTD)      | 307.3 [M+H] <sup>+</sup>                  | 289.3 / <b>259.3</b>           | -                        | -                              |
| d <sub>7</sub> -dhSph (ISTD)    | 309.4 [M+H] <sup>+</sup>                  | 291.3 / <b>261.3</b>           | -                        | -                              |
| d <sub>7</sub> -S1P (ISTD)      | 387.3 [M+H] <sup>+</sup>                  | <b>271.3</b> / 82.1            | -                        | -                              |
| Sph                             | 300.3 [M+H] <sup>+</sup>                  | 282.3 / <b>252.3</b>           | d <sub>7</sub> -Sph      | -                              |
| dhSph                           | 302.3 [M+H] <sup>+</sup>                  | 284.3 / <b>254.3</b>           | d <sub>7</sub> -dhSph    | -                              |
| S1P                             | 380.3 [M+H] <sup>+</sup>                  | <b>264.3</b> / 82.1            | d <sub>7</sub> -S1P      | -                              |
| dhCer 16:0                      | 540.5 [M+H] <sup>+</sup>                  | 522.6 / <b>284.3</b>           | Cer 17:0                 | dhCer 16:0                     |
| dhCer 18:0                      | 568.5 [M+H] <sup>+</sup>                  | 550.5 / <b>284.3</b>           | Cer 17:0                 | dhCer 18:0                     |
| dhCer 20:0                      | 596.6 [M+H] <sup>+</sup>                  | 578.6 / <b>284.3</b>           | Cer 17:0                 | dhCer 18:0                     |
| dhCer 22:0                      | 624.6 [M+H] <sup>+</sup>                  | 606.6 / <b>284.3</b>           | Cer 17:0                 | dhCer 24:0                     |
| dhCer 24:0                      | 652.7 [M+H] <sup>+</sup>                  | 634.6 / <b>284.3</b>           | Cer 17:0                 | dhCer 24:0                     |
| dhCer 24:1                      | 650.7 [M+H] <sup>+</sup>                  | 632.7 / <b>284.3</b>           | Cer 17:0                 | dhCer 24:1                     |
| Cer 17:0 (ISTD)                 | 534.5 [M-H <sub>2</sub> O+H] <sup>+</sup> | 282.3 / <b>264.3</b>           | -                        | -                              |
| Cer 16:0                        | 520.5 [M-H <sub>2</sub> O+H] <sup>+</sup> | 282.3 / <b>264.3</b>           | Cer 17:0                 | Cer 16:0                       |
| Cer 18:0                        | 548.5 [M-H <sub>2</sub> O+H] <sup>+</sup> | 282.3 / <b>264.2</b>           | Cer 17:0                 | Cer 18:0                       |
| Cer 20:0                        | 576.6 [M-H <sub>2</sub> O+H] <sup>+</sup> | 282.3 / <b>264.3</b>           | Cer 17:0                 | Cer 20:0                       |
| Cer 22:0                        | 604.6 [M-H <sub>2</sub> O+H] <sup>+</sup> | 282.3 / <b>264.3</b>           | Cer 17:0                 | Cer 22:0                       |
| Cer 24:0                        | 632.6 [M-H <sub>2</sub> O+H] <sup>+</sup> | 282.3 / <b>264.3</b>           | Cer 17:0                 | Cer 24:0                       |
| Cer 24:1                        | 630.6 [M-H <sub>2</sub> O+H] <sup>+</sup> | 282.3 / <b>264.3</b>           | Cer 17:0                 | Cer 24:1                       |
| dhSM 16:0                       | 705.6 [M+H] <sup>+</sup>                  | <b>184.0</b> / 86.1            | d <sub>31</sub> -SM 16:0 | SM 16:0                        |
| dhSM 18:0                       | 733.6 [M+H] <sup>+</sup>                  | <b>184.0</b> / 86.1            | d <sub>31</sub> -SM 16:0 | SM 18:0                        |
| dhSM 20:0                       | 761.6 [M+H] <sup>+</sup>                  | <b>184.0</b> / 86.1            | d <sub>31</sub> -SM 16:0 | SM 20:0                        |
| dhSM 22:0                       | 789.7 [M+H] <sup>+</sup>                  | <b>184.0</b> / 86.1            | d <sub>31</sub> -SM 16:0 | SM 22:0                        |
| dhSM 24:0                       | 817.7 [M+H] <sup>+</sup>                  | <b>184.0</b> / 86.1            | d <sub>31</sub> -SM 16:0 | SM 24:0                        |
| dhSM 24:1                       | 815.7 [M+H] <sup>+</sup>                  | 184.0 / <b>86.1</b>            | d <sub>31</sub> -SM 16:0 | SM 24:1                        |
| d <sub>31</sub> -SM 16:0 (ISTD) | 734.6 [M+H] <sup>+</sup>                  | <b>184.0</b> / 86.1            | -                        | -                              |
| SM 16:0                         | 703.6 [M+H] <sup>+</sup>                  | <b>184.0</b> / 86.1            | d <sub>31</sub> -SM 16:0 | SM 16:0                        |
| SM 18:0                         | 731.6 [M+H] <sup>+</sup>                  | <b>184.0</b> / 86.1            | d <sub>31</sub> -SM 16:0 | SM 18:0                        |
| SM 20:0                         | 759.6 [M+H] <sup>+</sup>                  | <b>184.0</b> / 86.1            | d <sub>31</sub> -SM 16:0 | SM 20:0                        |
| SM 22:0                         | 787.7 [M+H] <sup>+</sup>                  | <b>184.0</b> / 86.1            | d <sub>31</sub> -SM 16:0 | SM 22:0                        |
| SM 24:0                         | 815.7 [M+H] <sup>+</sup>                  | <b>184.0</b> / 86.1            | d <sub>31</sub> -SM 16:0 | SM 24:0                        |
| SM 24:1                         | 813.7 [M+H] <sup>+</sup>                  | 184.0 / <b>86.1</b>            | d <sub>31</sub> -SM 16:0 | SM 24:1                        |
| HexCer 17:0 (ISTD)              | 714.6 [M+H] <sup>+</sup>                  | 696.6 / <b>264.2</b>           | -                        | -                              |
| HexCer 16:0                     | 700.6 [M+H] <sup>+</sup>                  | 682.6 / <b>264.2</b>           | HexCer 17:0              | HexCer 16:0                    |
| HexCer 18:0                     | 728.6 [M+H] <sup>+</sup>                  | 710.6 / <b>264.2</b>           | HexCer 17:0              | HexCer 16:0                    |
| HexCer 20:0                     | 756.6 [M+H] <sup>+</sup>                  | 738.6 / <b>264.2</b>           | HexCer 17:0              | HexCer 16:0                    |
| HexCer 22:0                     | 784.6 [M+H] <sup>+</sup>                  | 766.6 / <b>264.2</b>           | HexCer 17:0              | HexCer 24:1                    |
| HexCer 24:0                     | 812.7 [M+H] <sup>+</sup>                  | 794.7 / <b>264.2</b>           | HexCer 17:0              | HexCer 24:1                    |
| HexCer 24:1                     | 810.7 [M+H] <sup>+</sup>                  | 792.7 / <b>264.2</b>           | HexCer 17:0              | HexCer 24:1                    |
| LacCer 17:0 (ISTD)              | 876.6 [M+H] <sup>+</sup>                  | 534.5 / <b>264.3</b>           | -                        | -                              |
| LacCer 16:0                     | 862.6 [M+H] <sup>+</sup>                  | 520.5 / <b>264.3</b>           | LacCer 17:0              | LacCer 16:0                    |
| LacCer 18:0                     | 890.6 [M+H] <sup>+</sup>                  | 548.5 / <b>264.3</b>           | LacCer 17:0              | LacCer 16:0                    |
| LacCer 20:0                     | 918.6 [M+H] <sup>+</sup>                  | 576.6 / <b>264.3</b>           | LacCer 17:0              | LacCer 16:0                    |
| LacCer 22:0                     | 946.6 [M+H] <sup>+</sup>                  | 604.6 / <b>264.3</b>           | LacCer 17:0              | LacCer 24:1                    |
| LacCer 24:0                     | 974.7 [M+H] <sup>+</sup>                  | 632.6 / <b>264.3</b>           | LacCer 17:0              | LacCer 24:1                    |
| LacCer 24:1                     | 972.7 [M+H] <sup>+</sup>                  | 630.7 / <b>264.3</b>           | LacCer 17:0              | LacCer 24:1                    |

292

<sup>a</sup>Quantifiers are given in bold.

293

Cer, ceramide; dhCer, dihydroceramide; dhSM, dihydrosphingomyelin; dhSph, dihydrosphingosine; HexCer, hexosylceramide;

294

ISTD, internal standard; LacCer, lactosylceramide; S1P, sphingosine 1-phosphate; SM, sphingomyelin; Sph, sphingosine.

295

296

297

298 **Supplementary References**

299

300

301

302

303

304

305

306

307

308

309

310

1. Idkowiak, J., et al., *Best practices and tools in R and Python for statistical processing and visualization of lipidomics and metabolomics data*. Nat Commun, 2025. **16**(1): p. 8714.
2. Wei, R., et al., *GSimp: A Gibbs sampler based left-censored missing value imputation approach for metabolomics studies*. PLOS Computational Biology, 2018. **14**(1): p. e1005973.
3. van den Berg, R.A., et al., *Centering, scaling, and transformations: improving the biological information content of metabolomics data*. BMC Genomics, 2006. **7**(1): p. 142.
4. Do, K.T., et al., *Characterization of missing values in untargeted MS-based metabolomics data and evaluation of missing data handling strategies*. Metabolomics, 2018. **14**(10): p. 128.
5. Wei, R., et al., *Missing Value Imputation Approach for Mass Spectrometry-based Metabolomics Data*. Scientific Reports, 2018. **8**(1): p. 663.
